# Supplementary material for: Development of new thiazolidine-2,4-dione hybrids as aldose reductase inhibitors endowed with antihyperglycaemic activity: design, synthesis, biological investigations, and in silico insights
Source: PubMed Central journal article supplement — J Enzyme Inhib Med Chem. 2023 Jul 20;38(1):2231170. doi: 10.1080/14756366.2023.2231170 (PMC10361003; doi:10.1080/14756366.2023.2231170), 2023-07-20

***Development of new thiazolidine-2,4-dione hybrids as aldose reductase inhibitors endowed with antihyperglycemic activity: design, synthesis, biological investigations and in silico insights.***

**Abdelrahman Hamdi<sup>a,\*</sup>, Muhammad Yaseen<sup>b,\*</sup>, Wafaa A. Ewes<sup>a</sup>, Mashooq Ahmad Bhat<sup>c</sup>, Noha I. Ziedan<sup>d</sup>, Hamed W. El-Shafey<sup>a</sup>, Ahmed A. B. Mohamed<sup>e</sup>, Mohamed R. Elnagar<sup>f,g</sup>, Abdullah Haikal<sup>h</sup>, Dina I. A. Othman<sup>a</sup>, Abdullah A. Elgazar<sup>i</sup>, Ahmed H. A. Abusabaa<sup>j</sup>, Kamal S. Abdelrahman<sup>k</sup>, Osama M. Soltan<sup>k</sup>, Mostafa M. Elbadawi<sup>l</sup>**

<sup>a</sup>*Department of Pharmaceutical Organic Chemistry, Faculty of Pharmacy, Mansoura University, Mansoura, 35516, Egypt*

<sup>b</sup>*Institute of Chemical Sciences, University of Swat. Main campus, Charbagh, 19130, Swat, Pakistan*

<sup>c</sup>*Department of pharmaceutical chemistry, college of pharmacy, King Saud University, Riyadh, Saudi Arabia.*

<sup>d</sup>*University of Chester, Chester, United Kingdom*

<sup>e</sup>*Department of Medicinal Chemistry, Faculty of Pharmacy, Mansoura University, Mansoura, Egypt*

<sup>f</sup>*Pharmacology and Toxicology Department, Faculty of Pharmacy, Al-Azhar University, Cairo, 11823, Egypt*

<sup>g</sup>*Department of Pharmacology, College of Pharmacy, The Islamic University, Najaf, 54001, Iraq*

<sup>h</sup>*Department of Pharmacognosy, Faculty of Pharmacy, Mansoura University, Mansoura, 35516, Egypt*

<sup>i</sup>*Department of Pharmacognosy, Faculty of Pharmacy, Kafrelsheikh University, Kafrelsheikh, Egypt*

<sup>j</sup>*Department of Organic and Medicinal Chemistry, Faculty of Pharmacy, Fayoum University, 63514, Egypt*

<sup>k</sup>*Department of Pharmaceutical Chemistry, Faculty of Pharmacy, Al-Azhar University, Assiut Branch, Assiut, 71524, Egypt*

<sup>l</sup>*Department of Pharmaceutical Chemistry, Faculty of Pharmacy, Kafrelsheikh University, Kafrelsheikh, 33516, Egypt*

\*Corresponding author: Abdelrahman Hamdi (e-mail: [abdelrahmanhamdi2012@yahoo.com](mailto:abdelrahmanhamdi2012@yahoo.com))

Muhammad Yaseen (e-mail: [muhammadyaseen.my907@gmail.com](mailto:muhammadyaseen.my907@gmail.com))

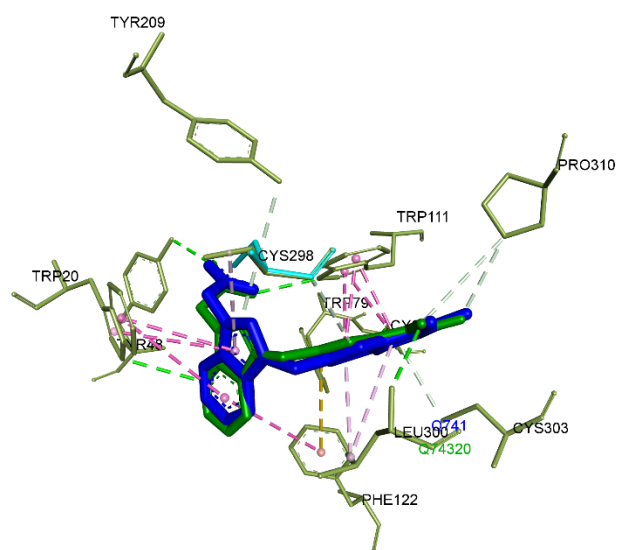

Fig.s1 Redocked co-crystallized ligand (blue) overlaid on the experimental pose (Green) showing RMSD=1.3 Å

Abdelrahman hamdi-AA03-proton-DMSO-D  
Abdelrahman hamdi-AA03-proton-DMSO-D

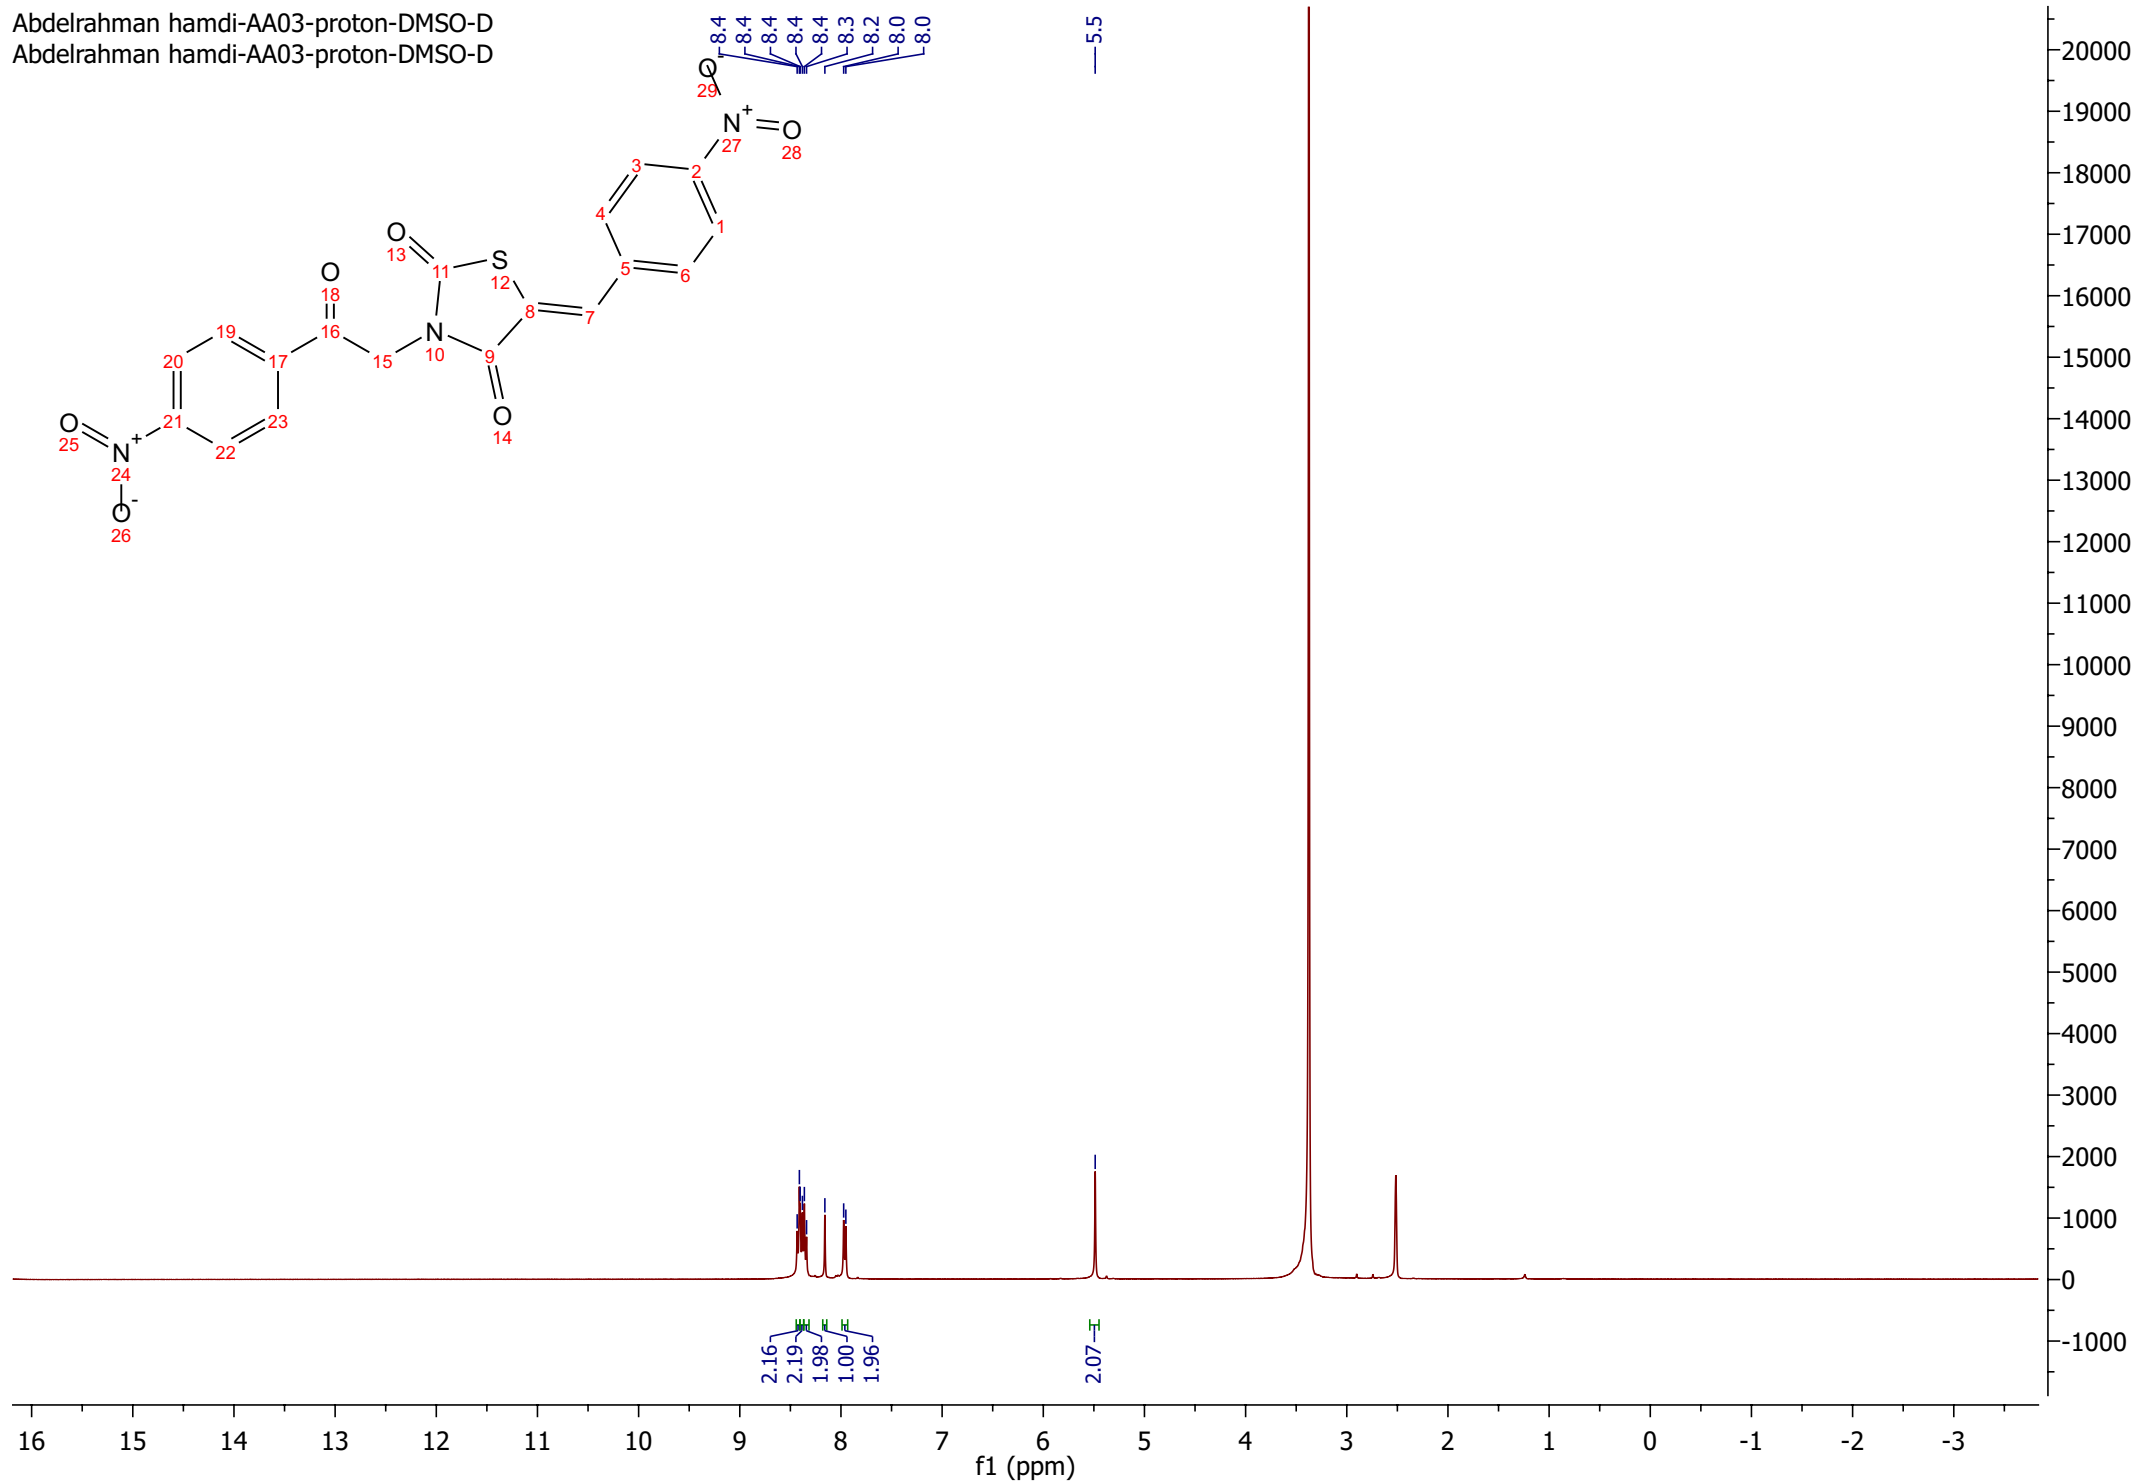

Abdelrahman hamdi-AA05-proton-DMSO-D  
Abdelrahman hamdi-AA05-proton-DMSO-D

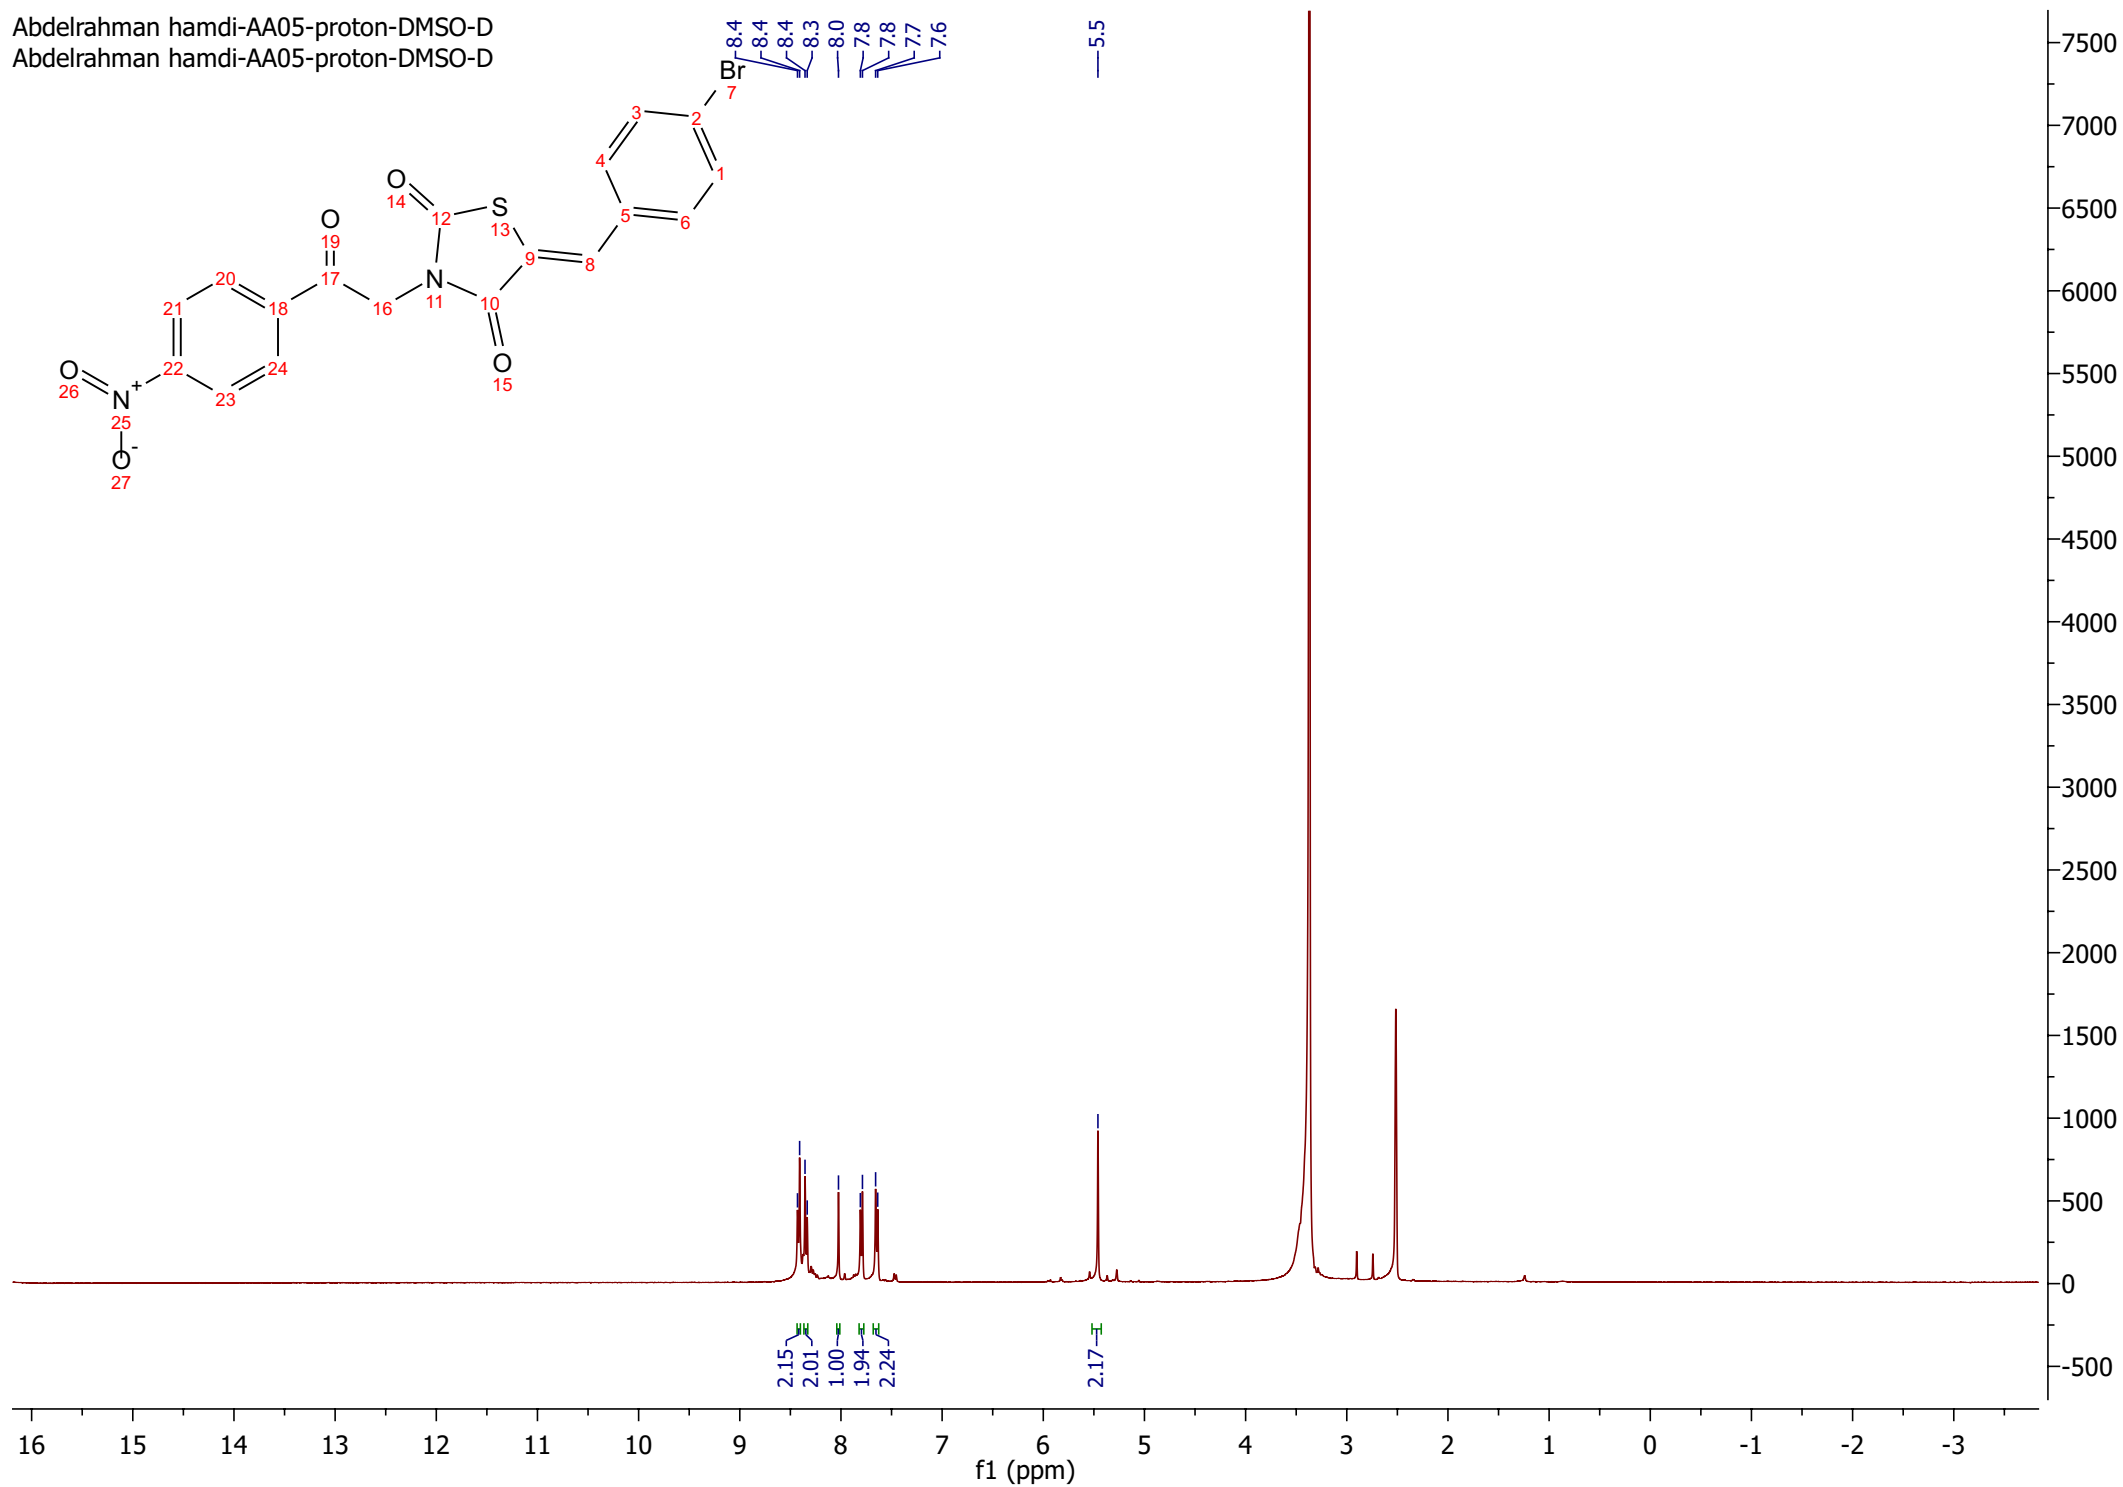

Abdelrahman hamdi-AA06-proton-DMSO-D  
Abdelrahman hamdi-AA06-proton-DMSO-D

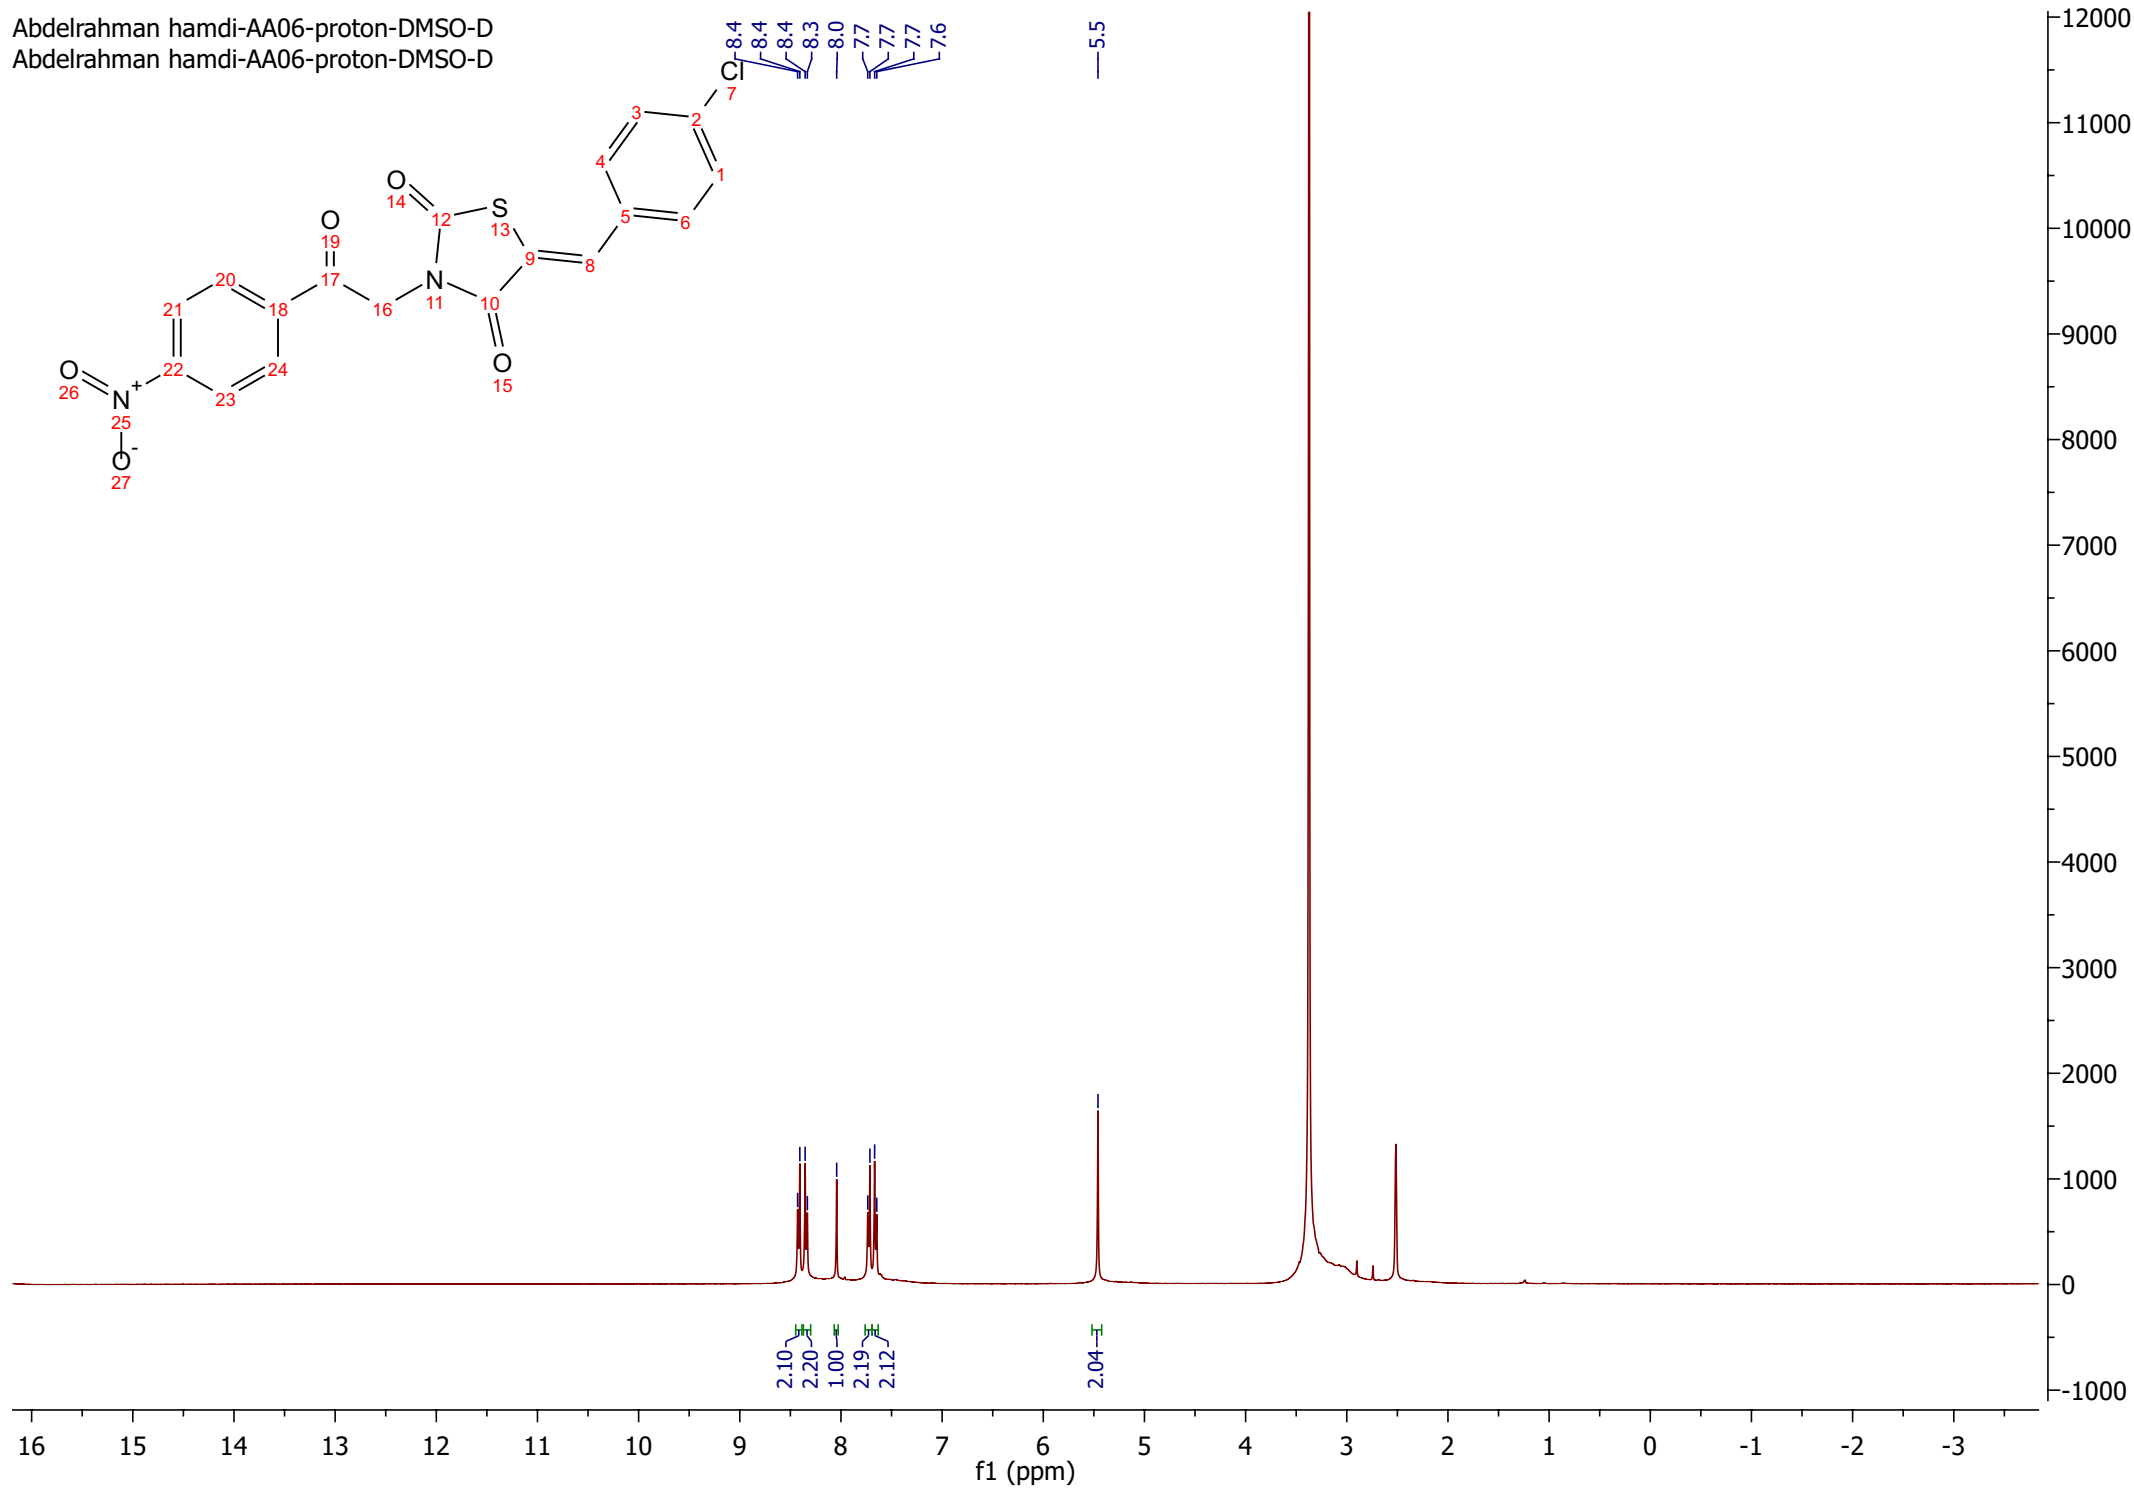

Abdelrahman hamdi-AA07-proton-DMSO-D  
Abdelrahman hamdi-AA07-proton-DMSO-D

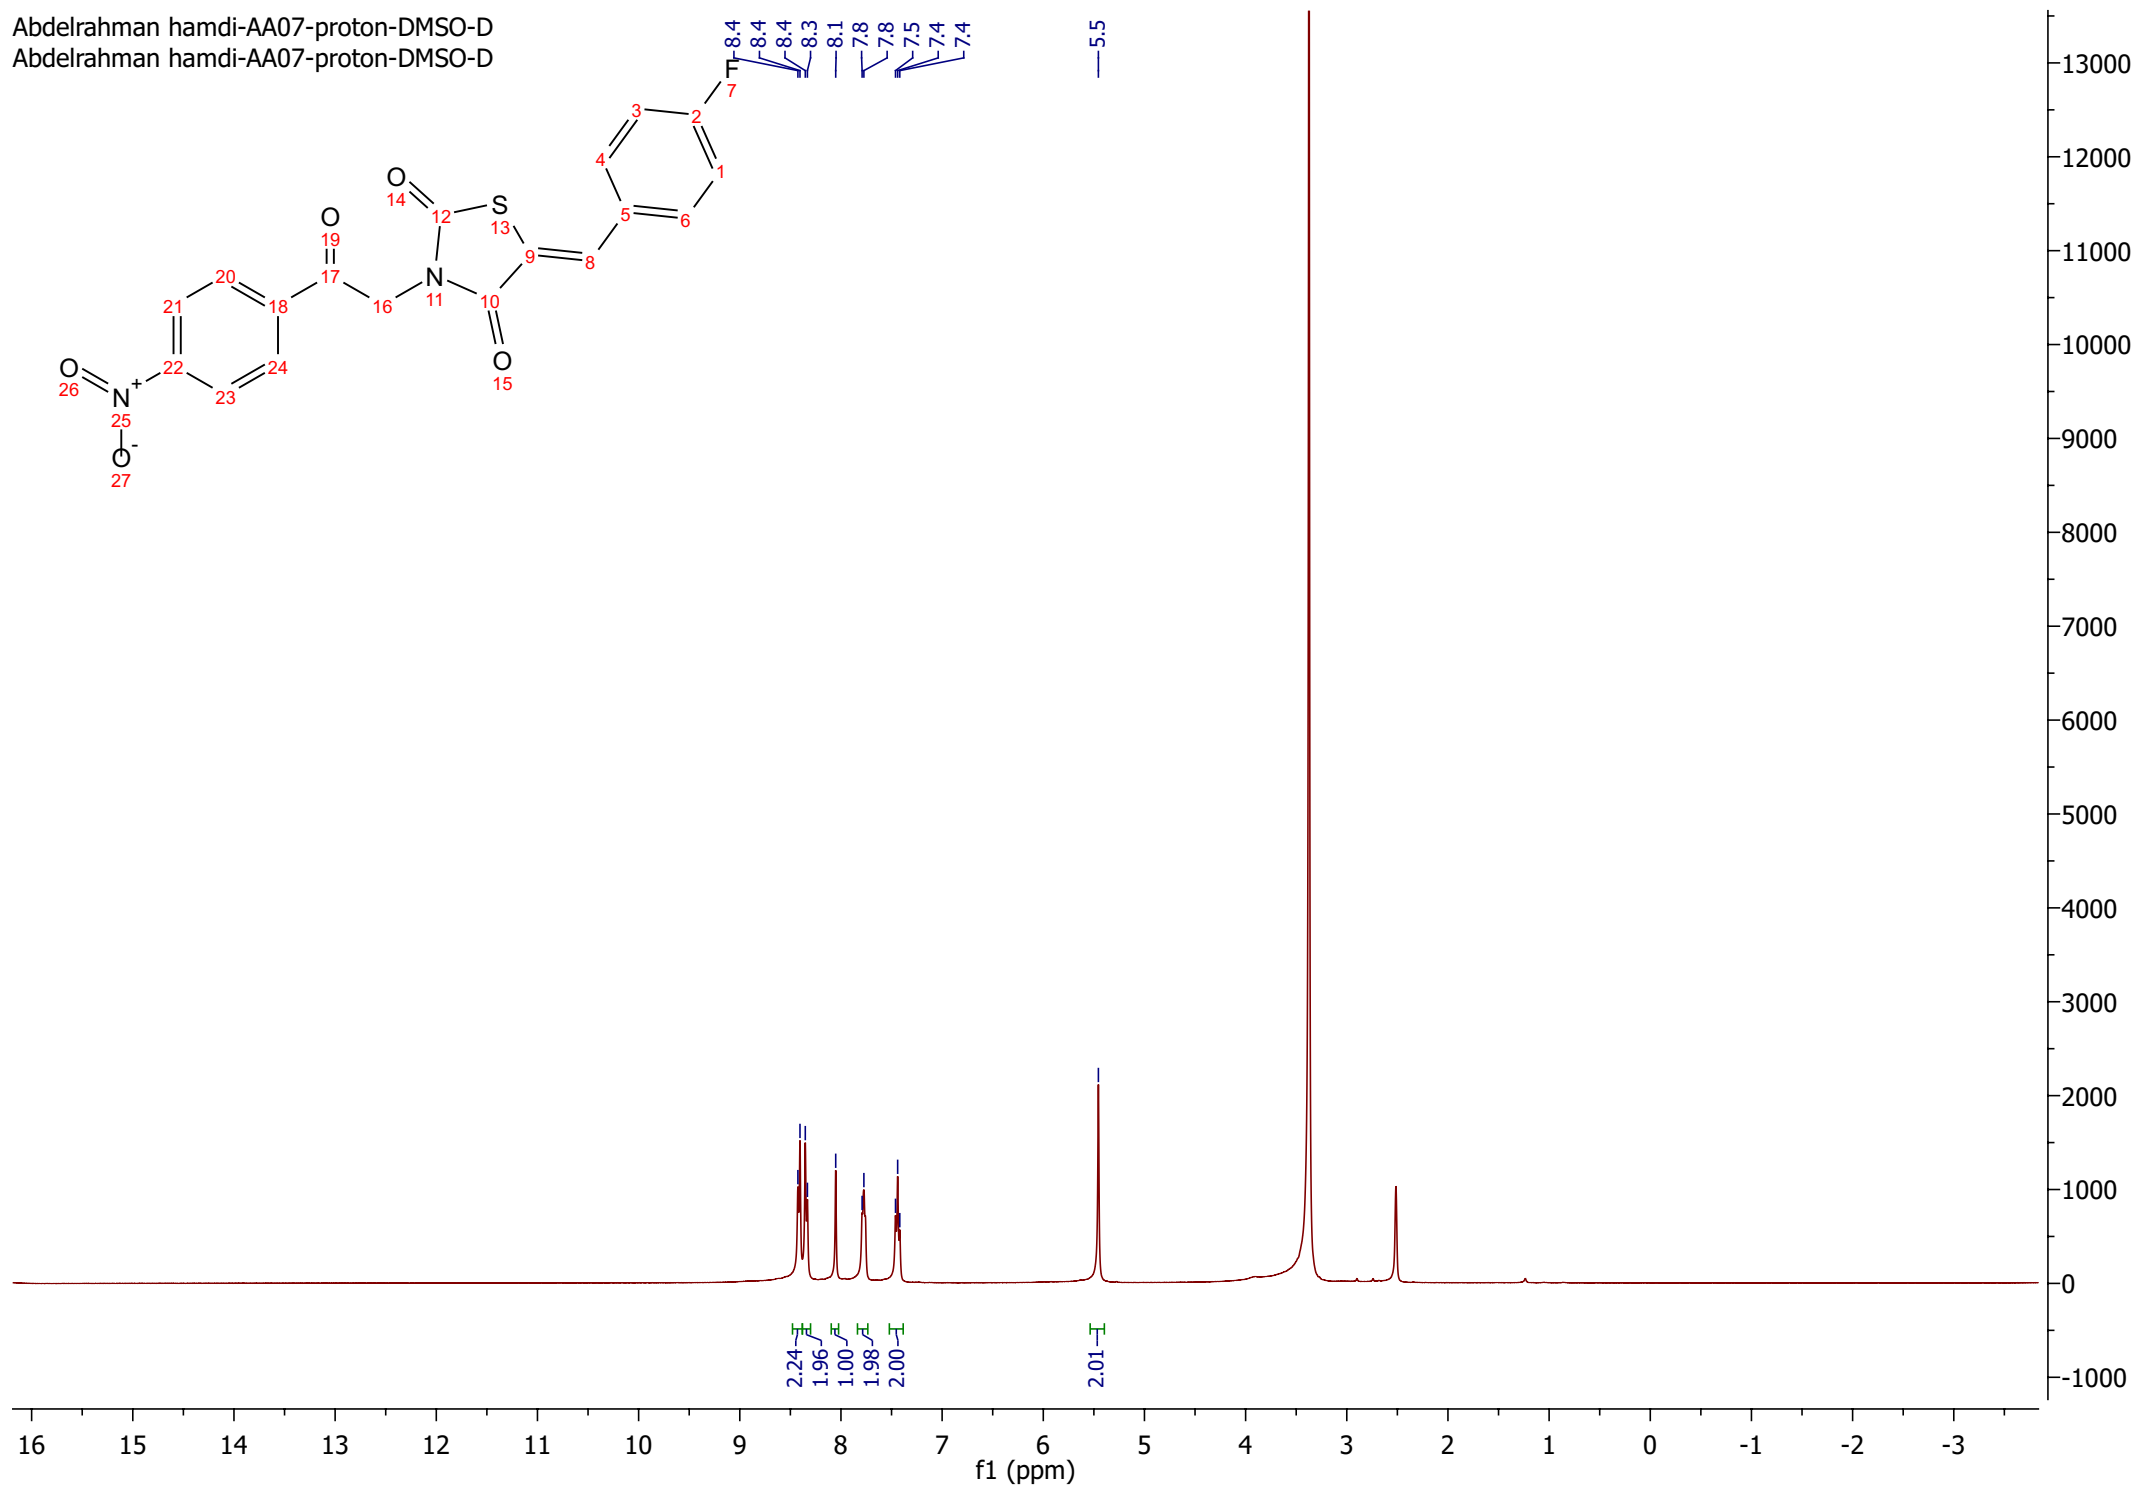

Abdelrhman hamdy-AA08-proton-DMSO-D  
Abdelrhman hamdy-AA08-proton-DMSO-D

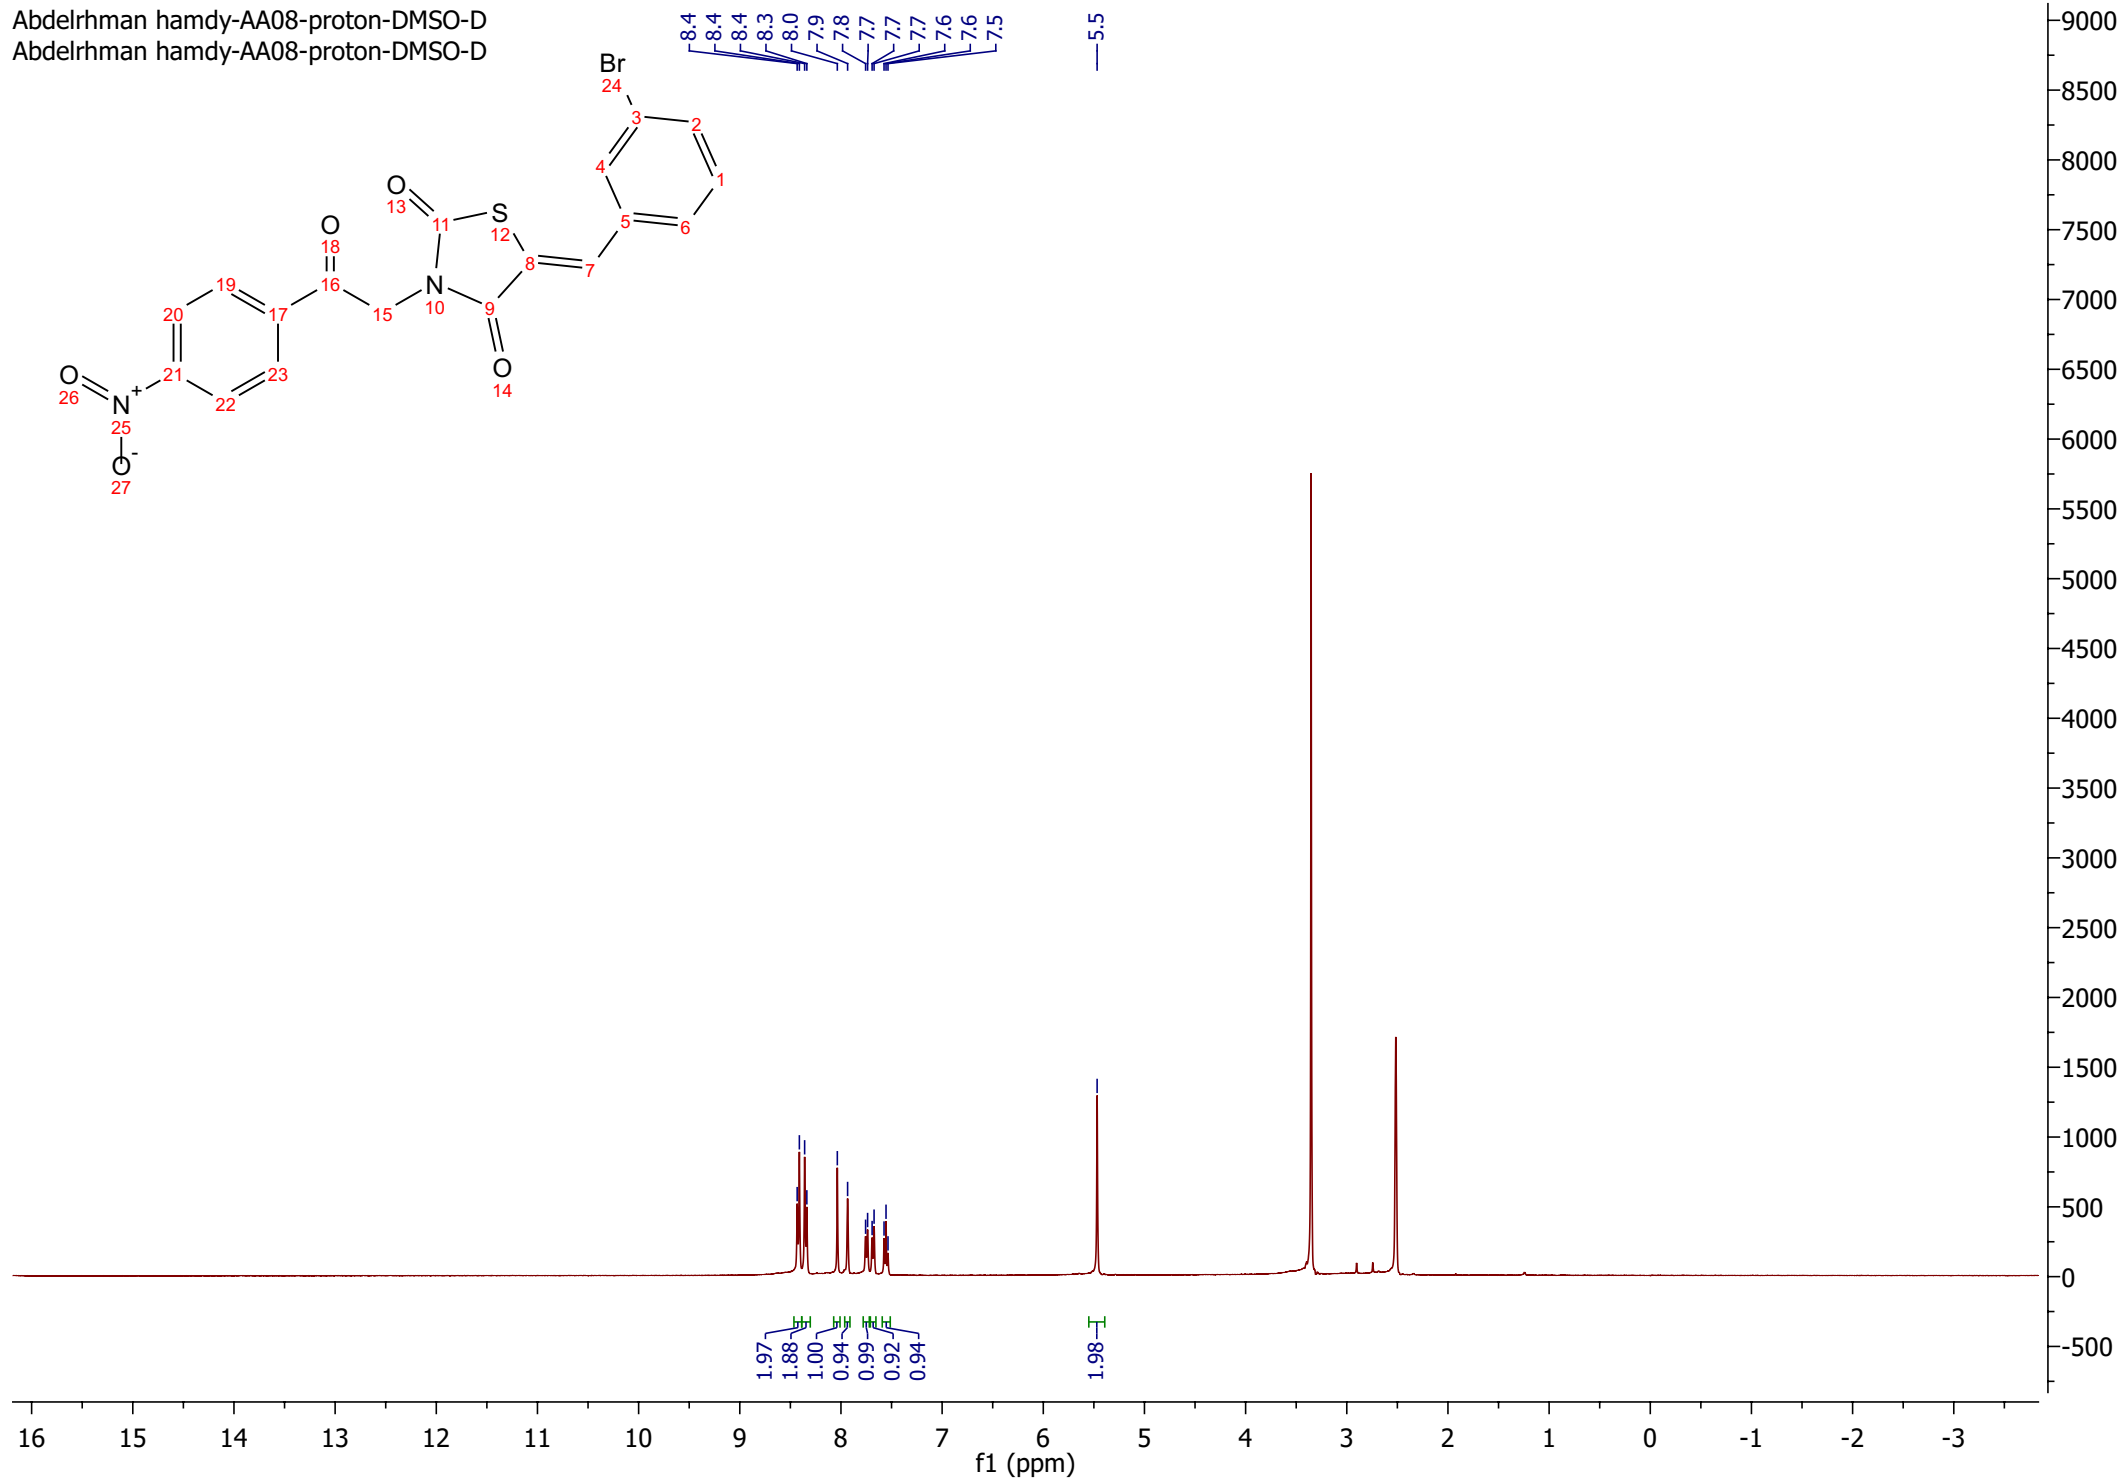

Abdelrhman hamdy-AA09-proton-DMSO-D  
Abdelrhman hamdy-AA09-proton-DMSO-D

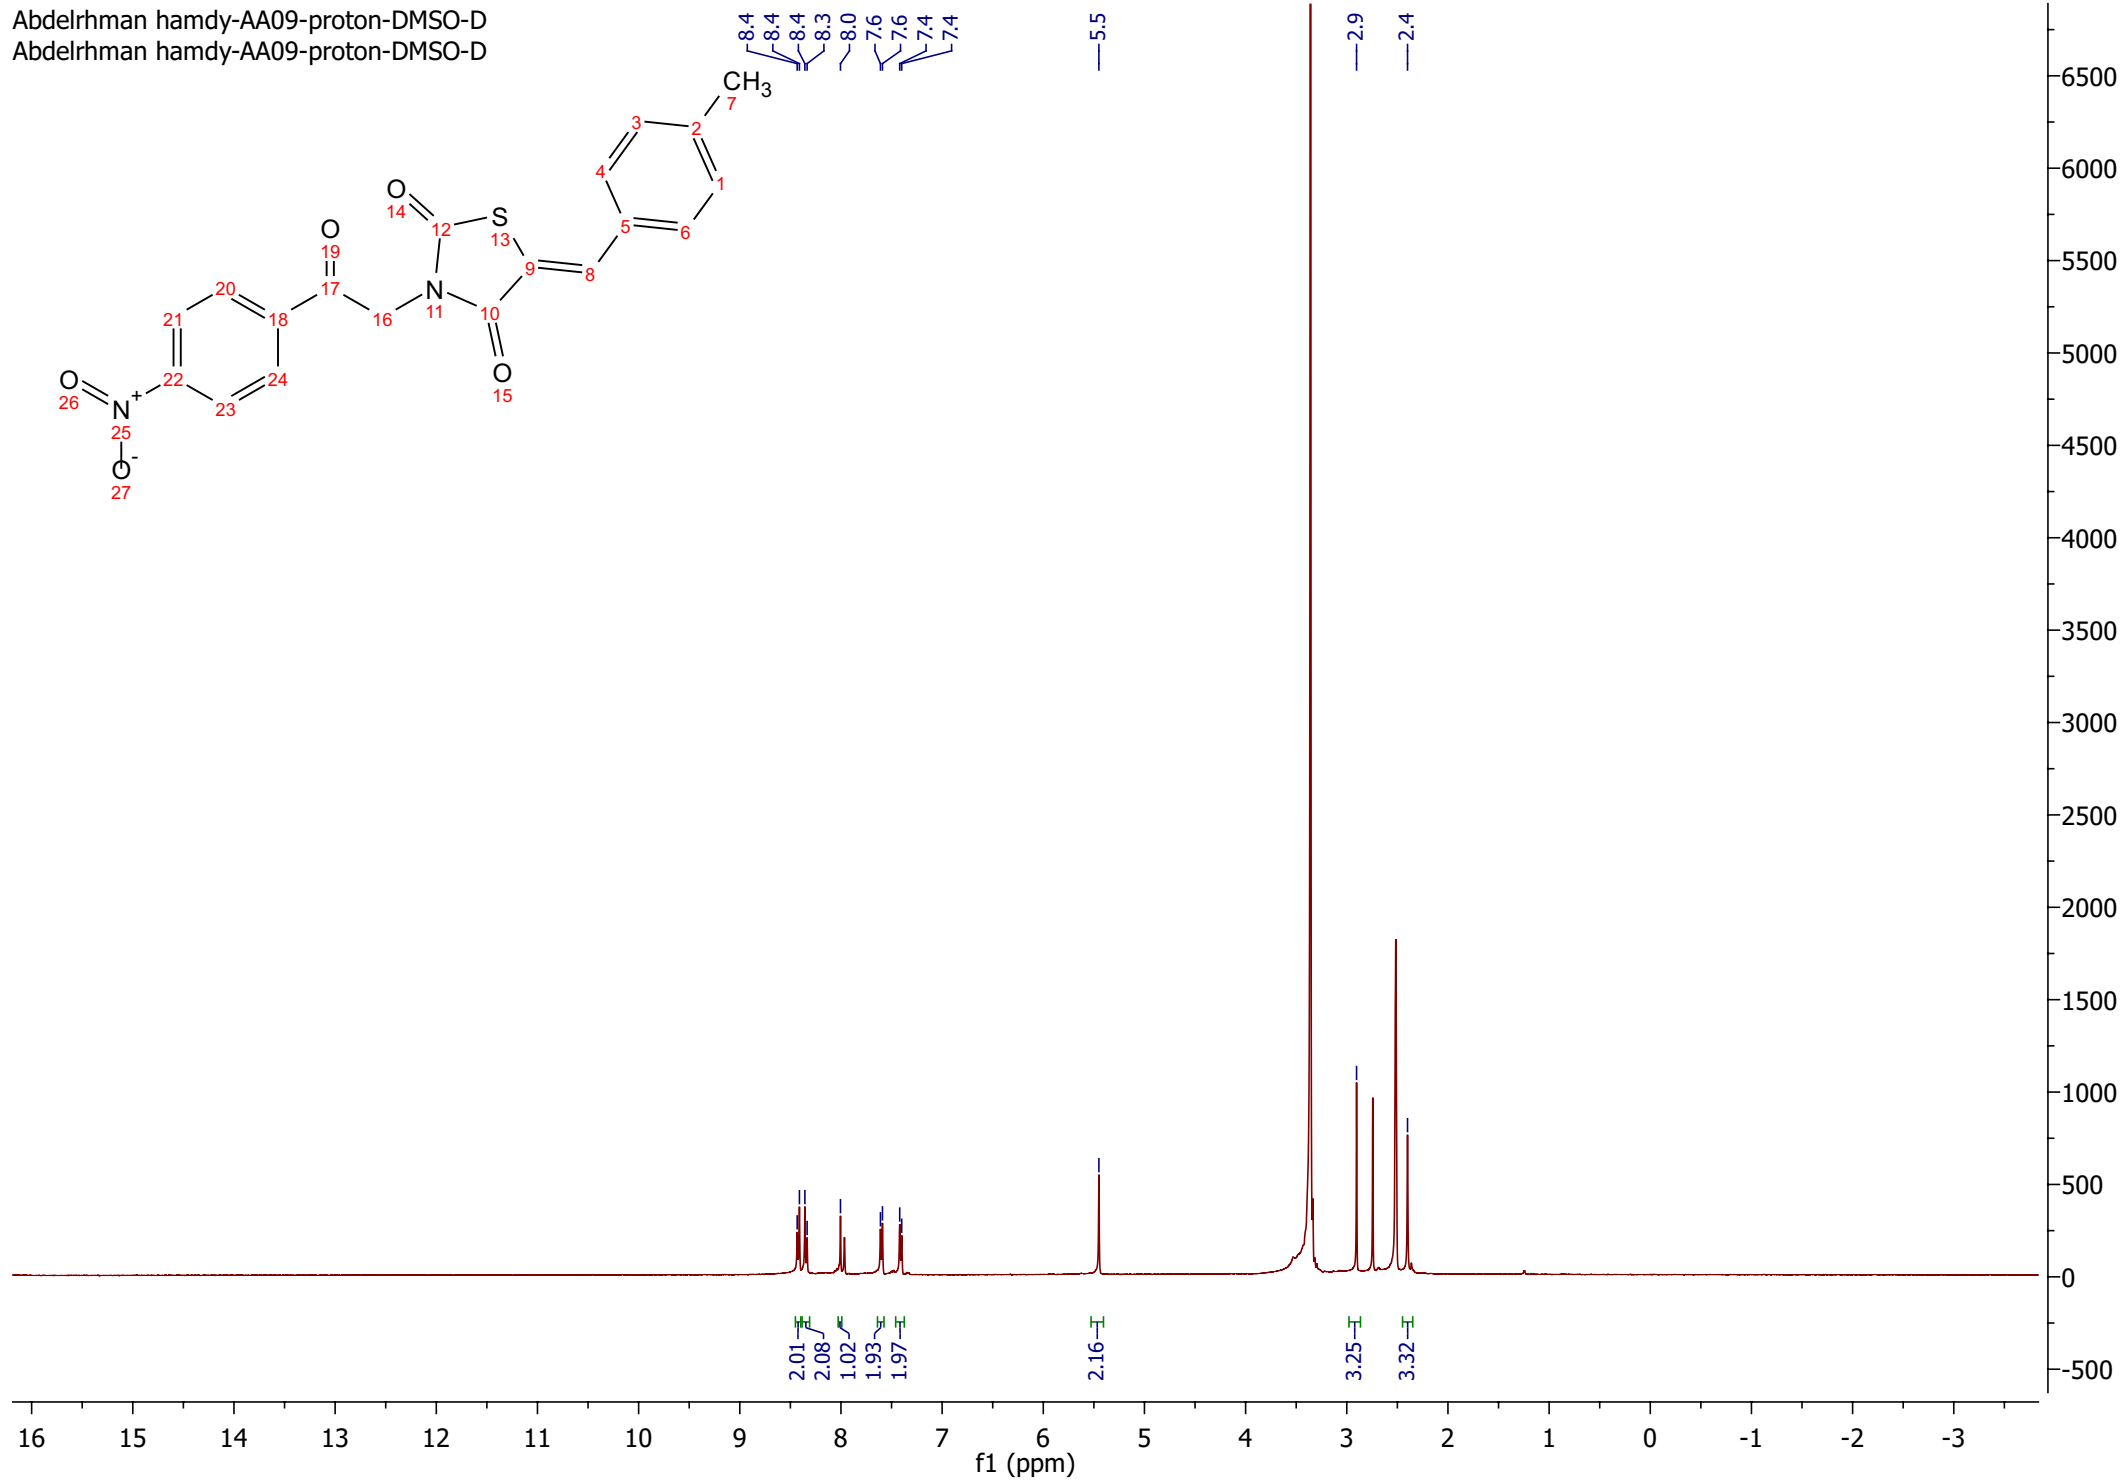



Abdelrhman hamdy-AA10-proton-DMSO-D  
Abdelrhman hamdy-AA10-proton-DMSO-D

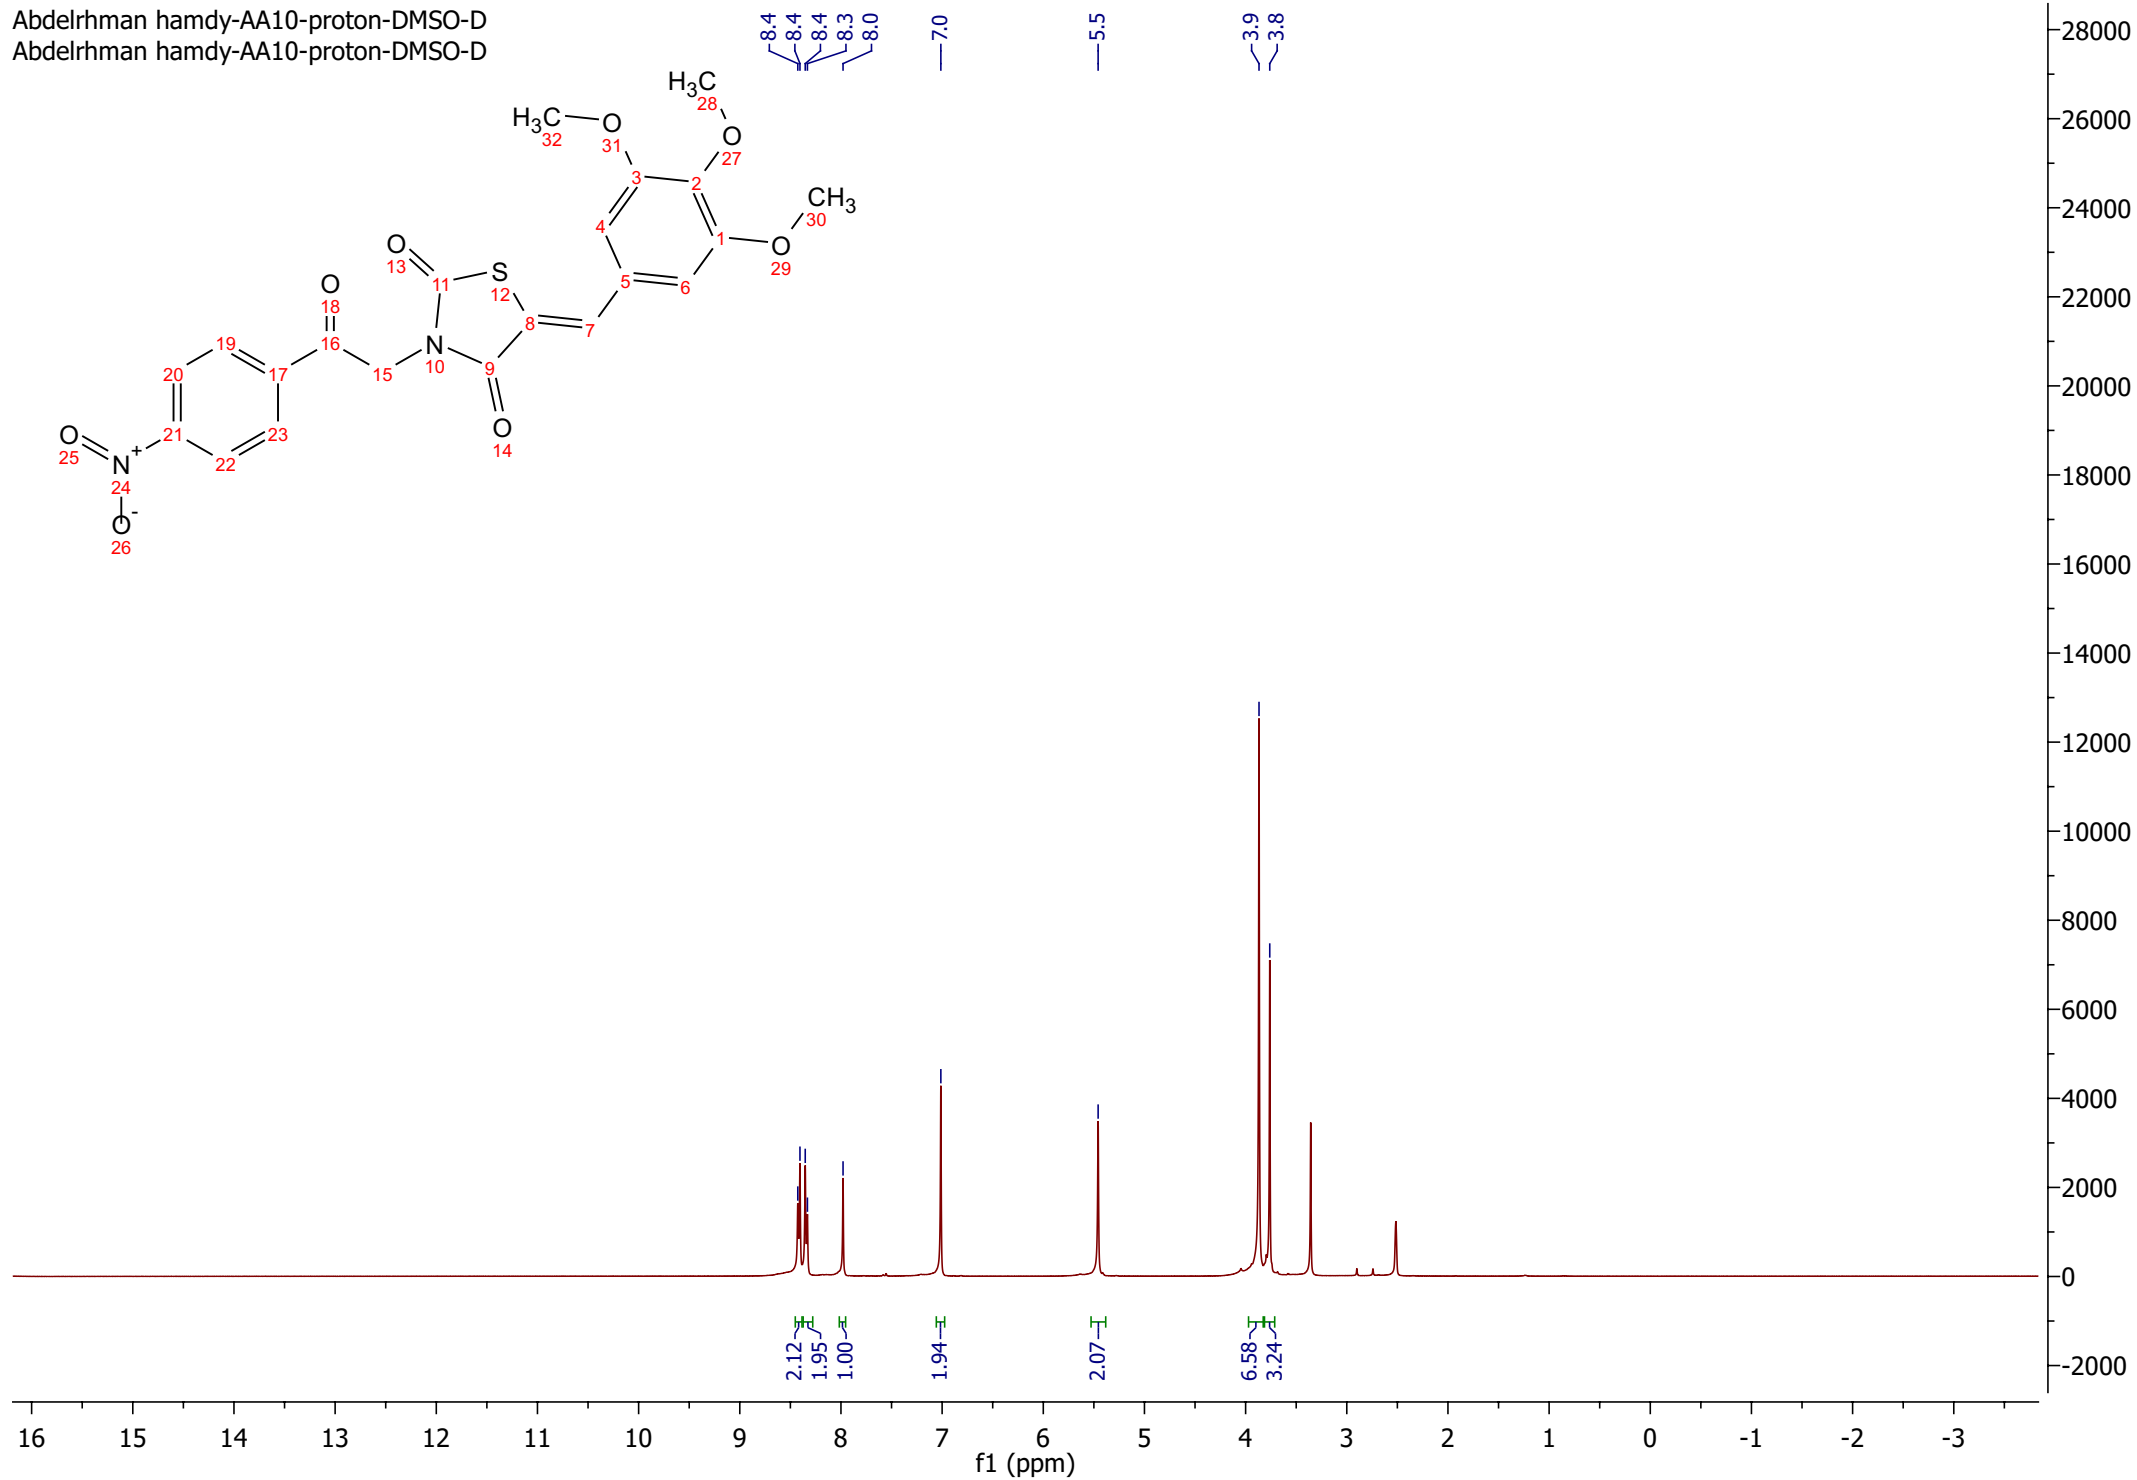

Abdelrahman Hamdy- AA17-proton-DMSO-D  
Abdelrahman Hamdy- AA17-proton-DMSO-D

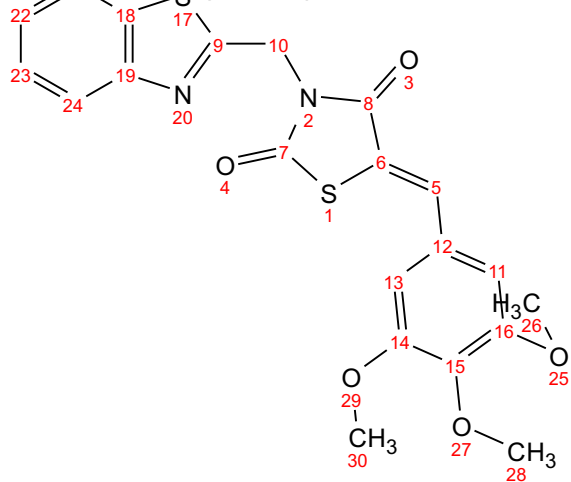

8.1  
8.1  
8.0  
8.0  
8.0  
7.6  
7.5  
7.5  
7.5  
7.5  
7.0

5.3

3.9  
3.8

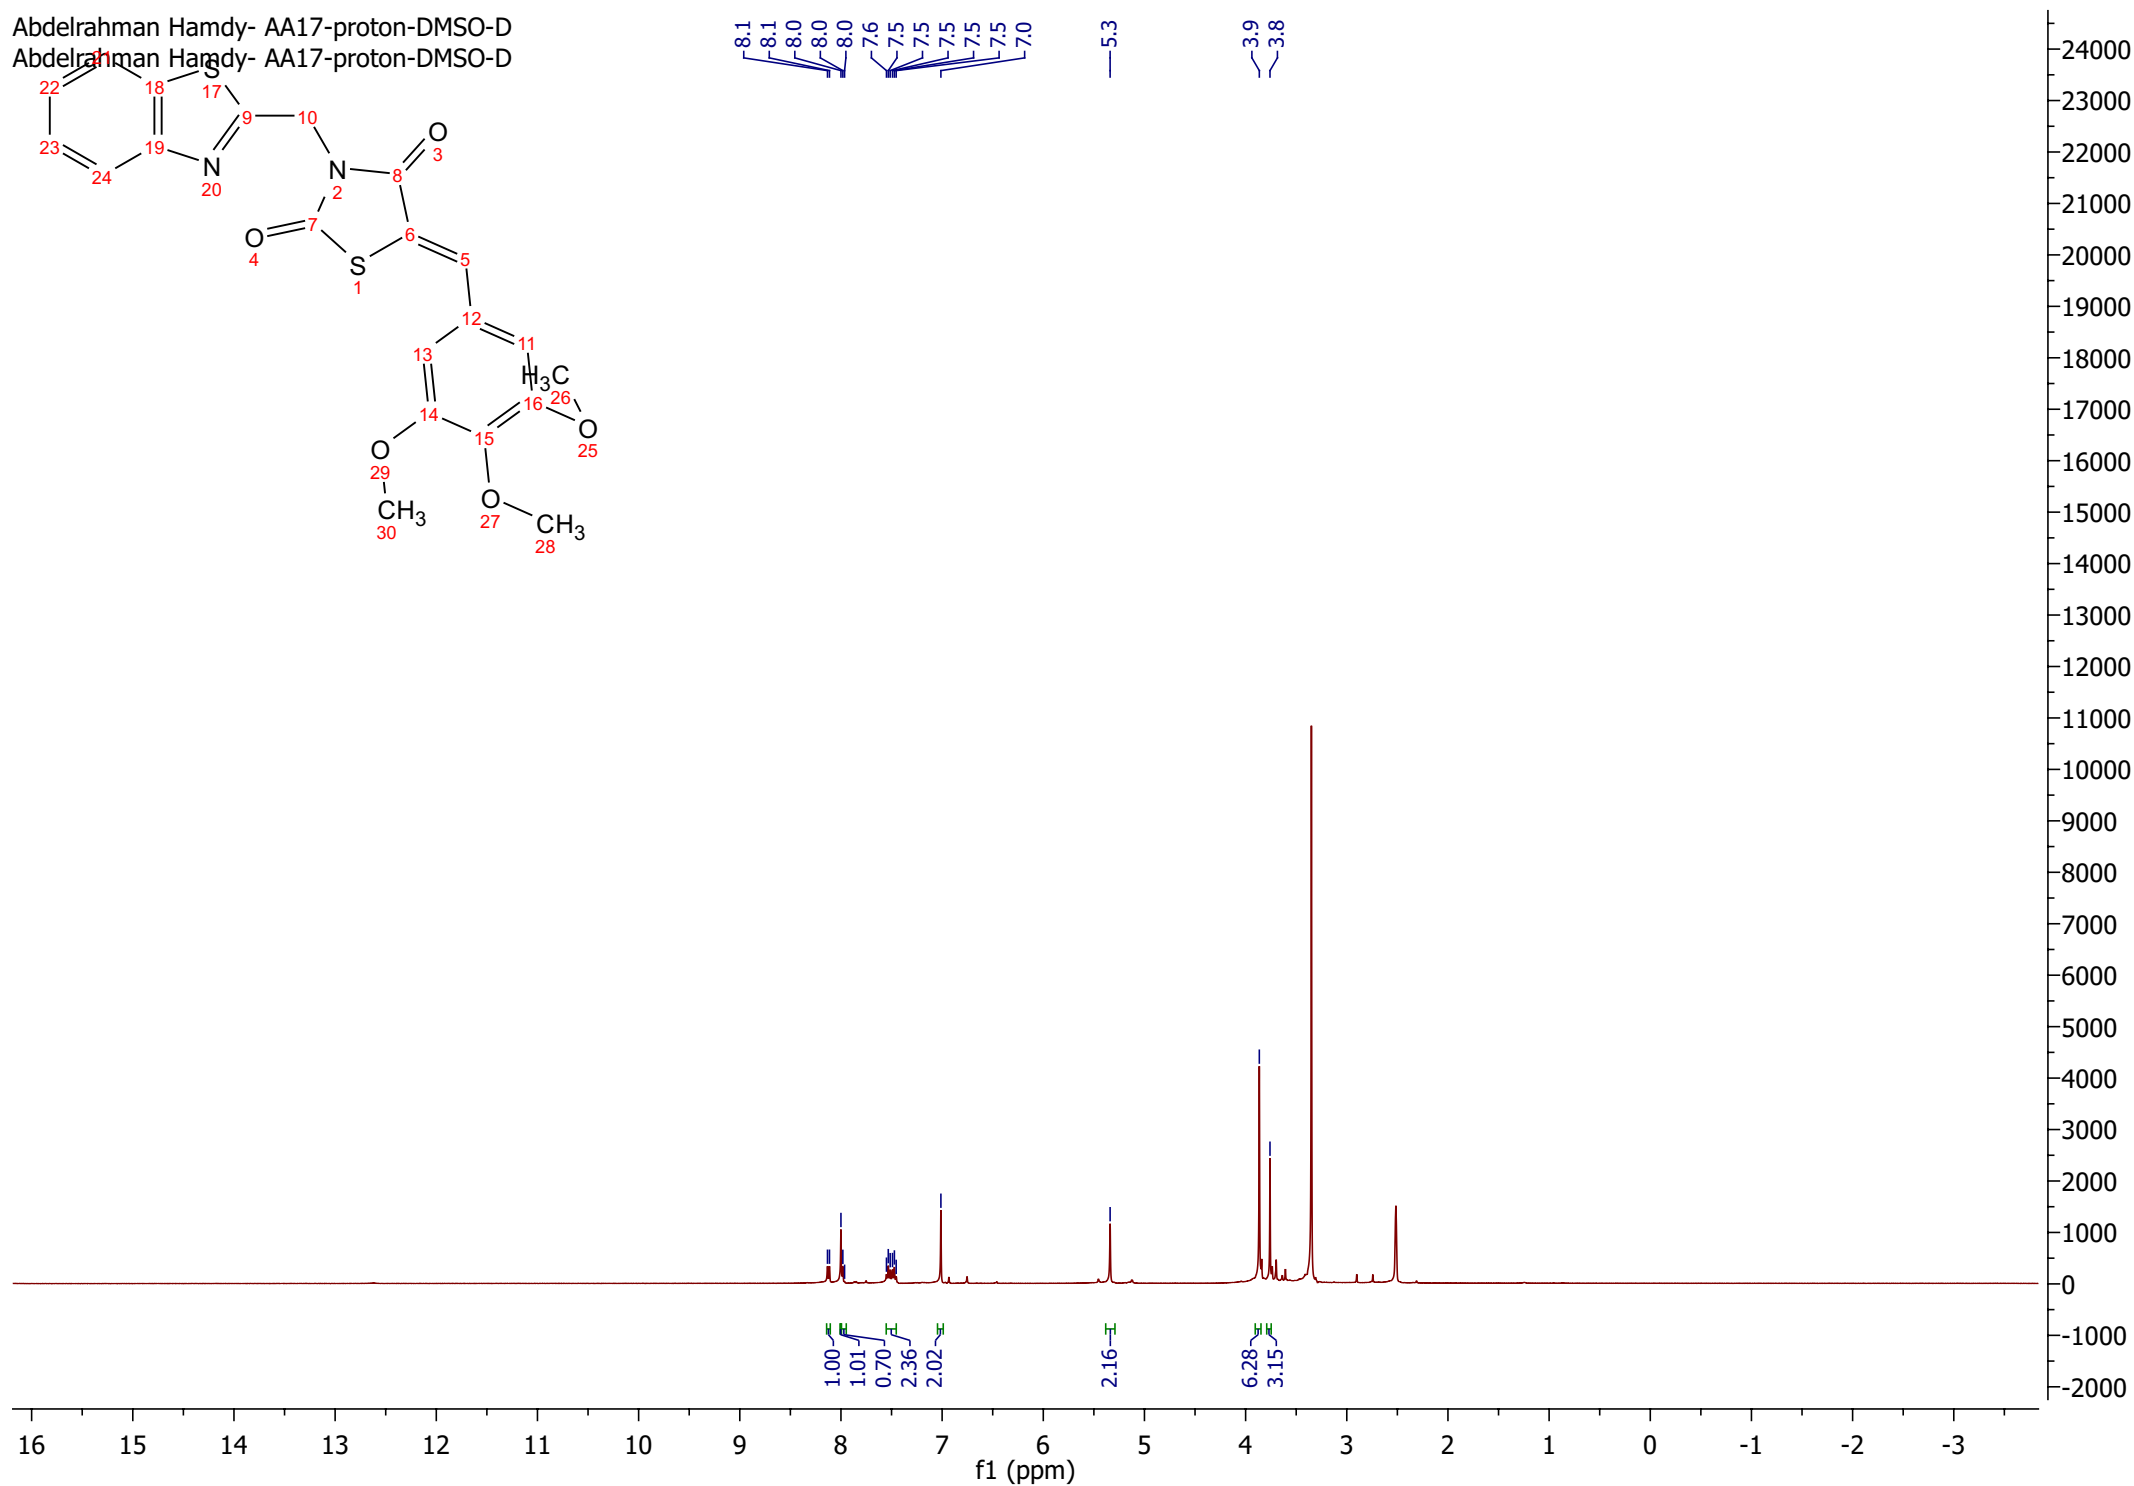

1.00  
1.01  
0.70  
2.36  
2.02

2.16

6.28  
3.15

16 15 14 13 12 11 10 9 8 7 6 5 4 3 2 1 0 -1 -2 -3

f1 (ppm)



Abdelrahman Hamdy- AA19-proton-DMSO-D  
Abdelrahman Hamdy- AA19-proton-DMSO-D

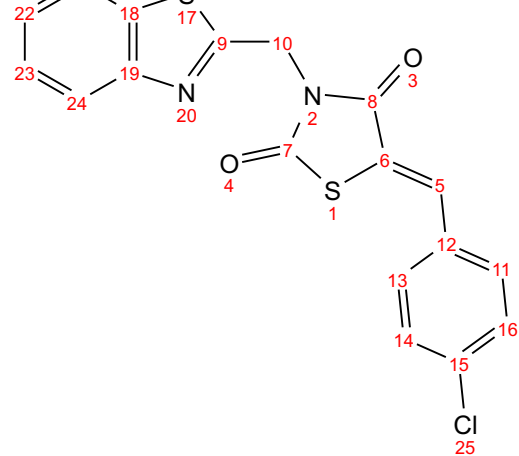

8.1  
8.1  
8.0  
8.0  
7.7  
7.7  
7.7  
7.6  
7.5  
7.5  
7.5  
7.5  
7.4

5.3

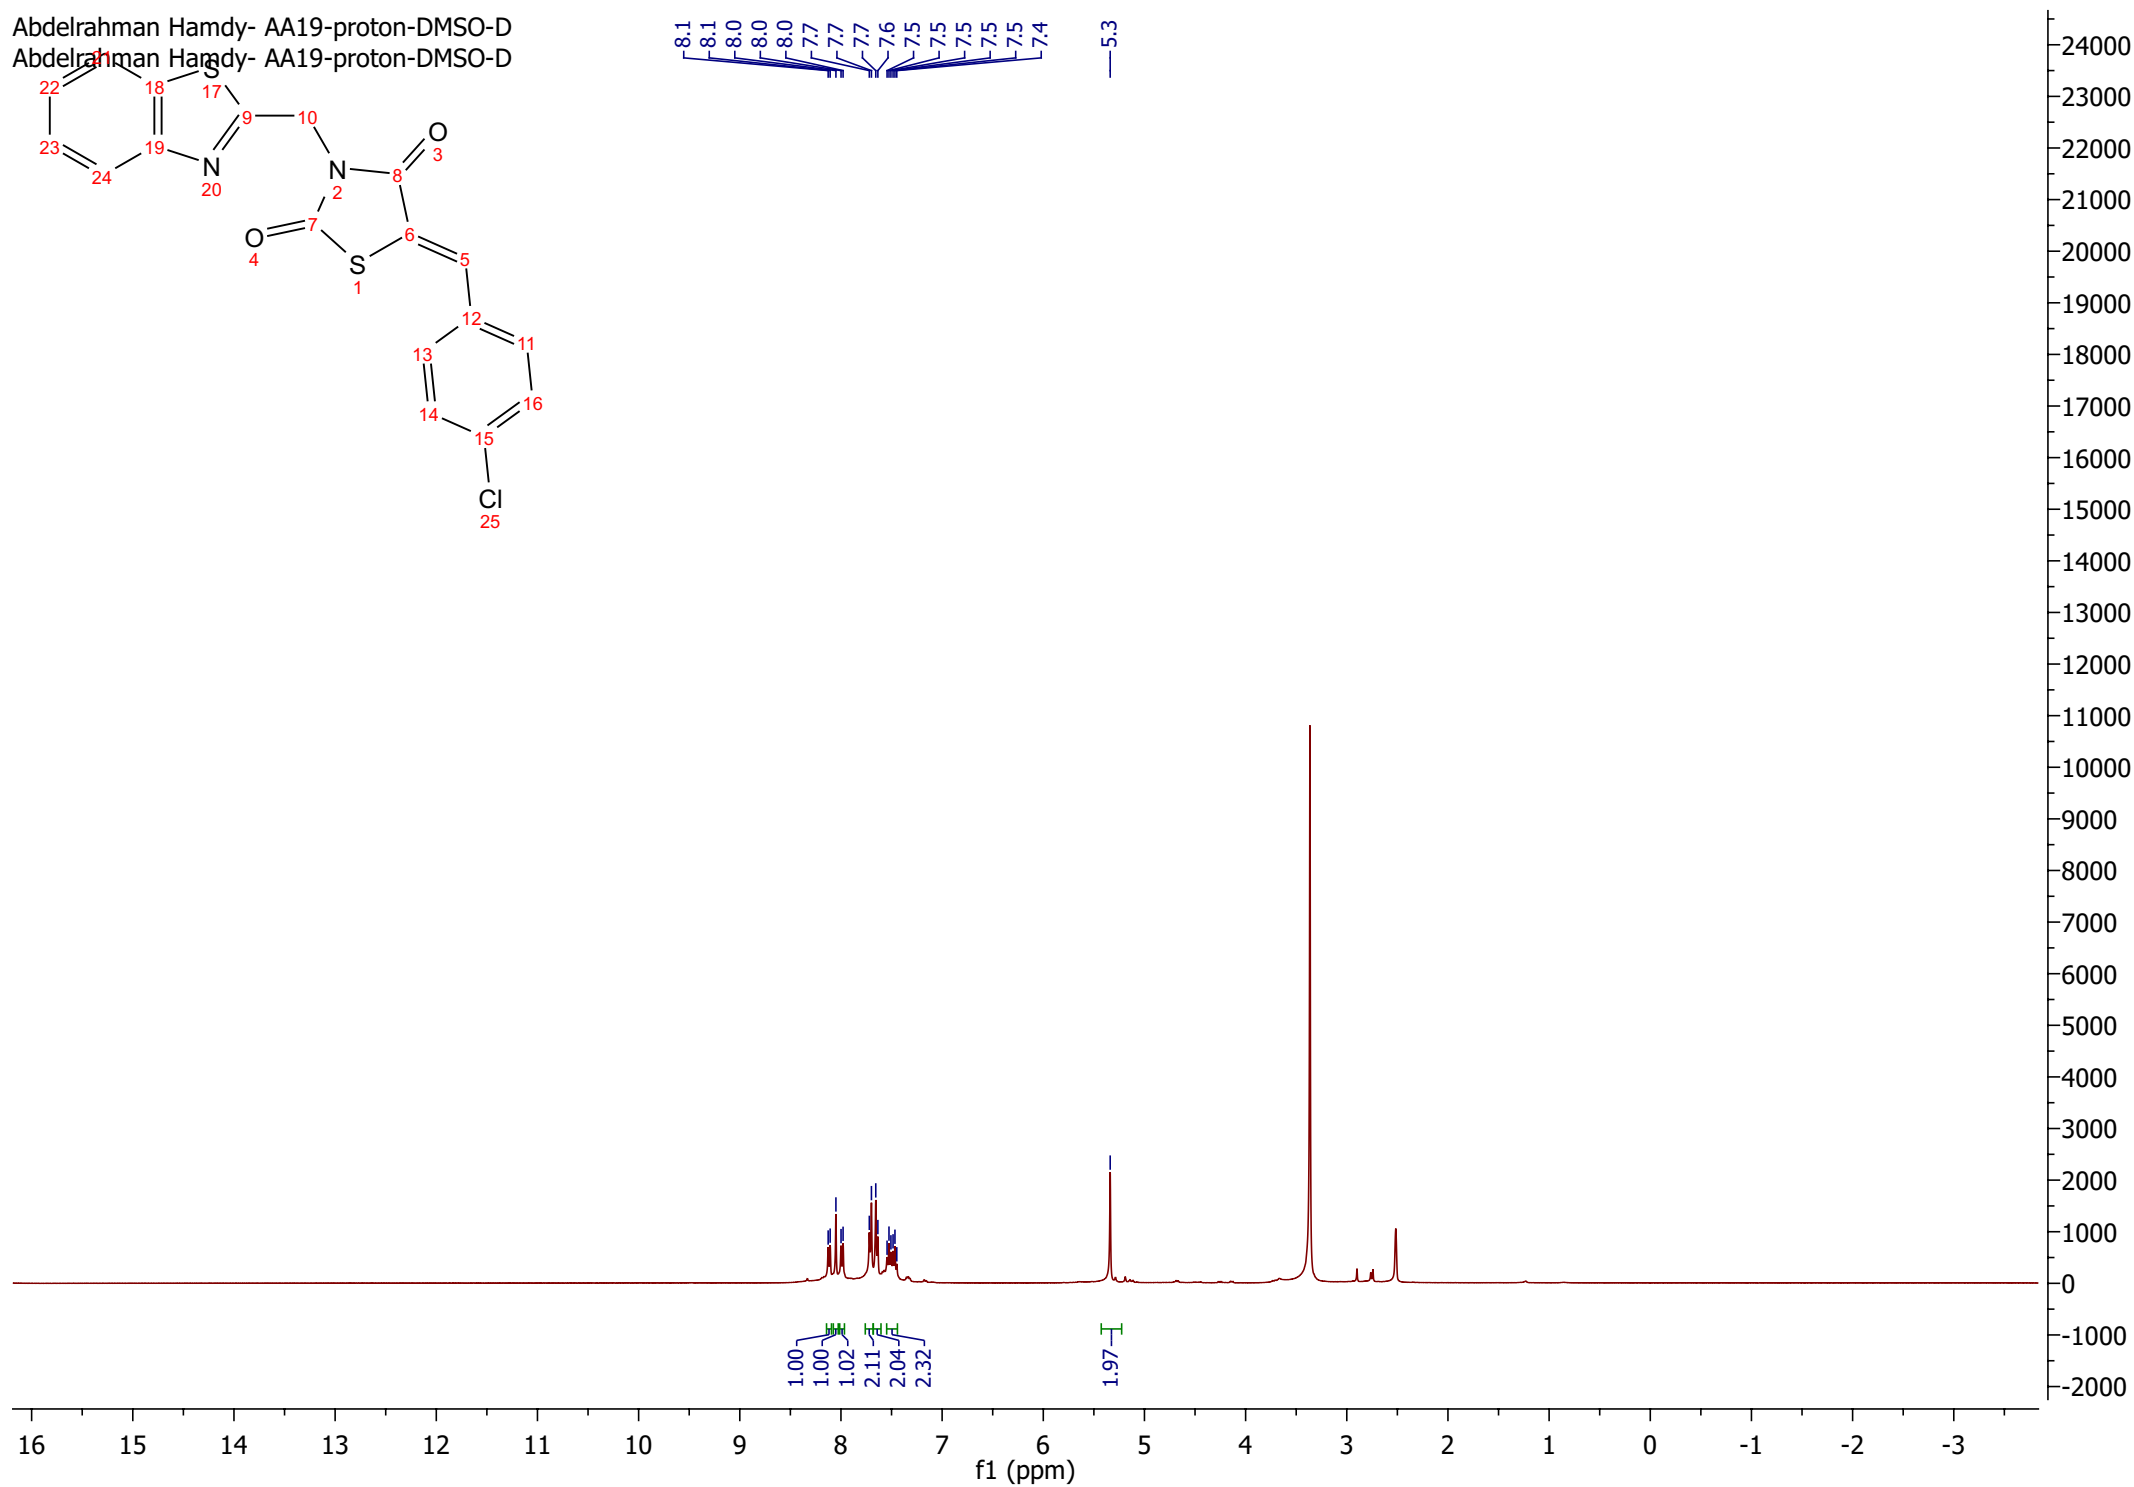

Abdelrahman Hamdy- AA20-proton-DMSO-D  
Abdelrahman Hamdy- AA20-proton-DMSO-D

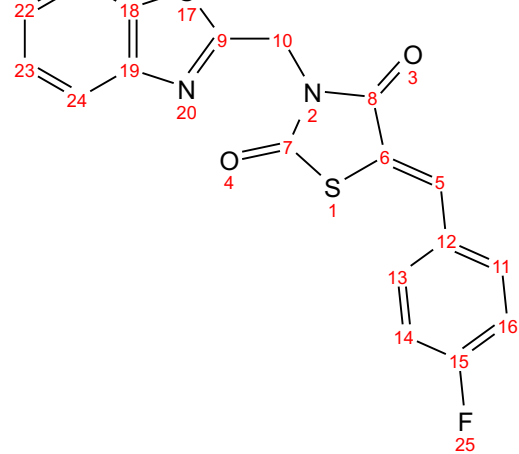

8.1  
8.1  
8.1  
8.0  
8.0  
7.8  
7.8  
7.8  
7.5  
7.5  
7.5  
7.5  
7.5  
7.4  
7.4  
5.3

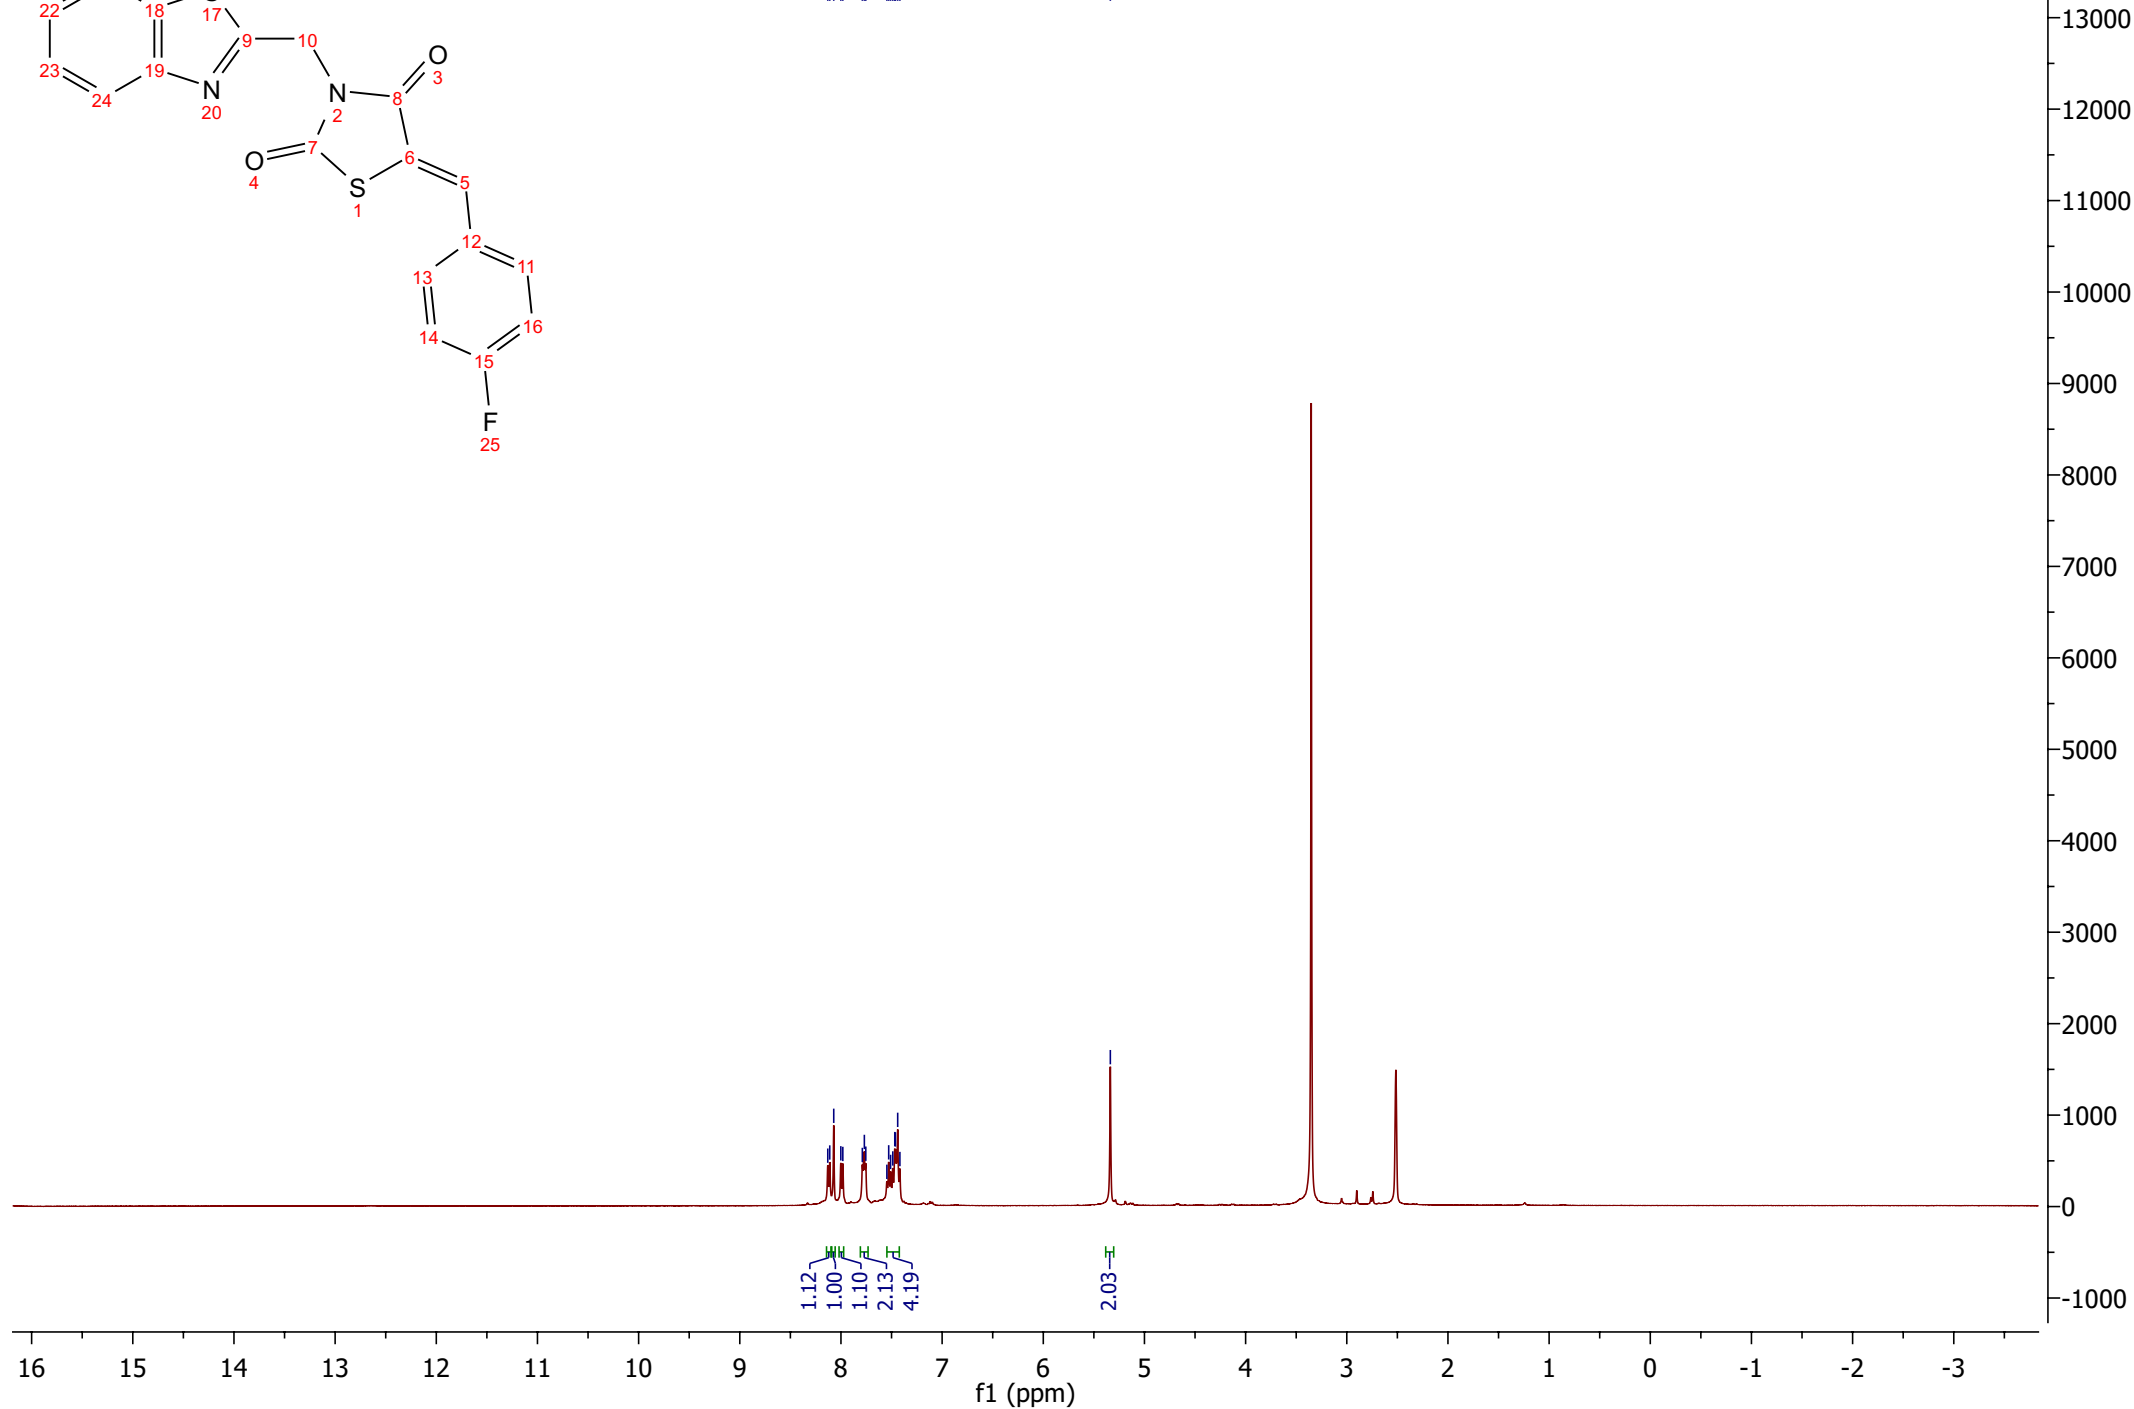

Dina Othman-Benzothiazole Br-proton-CdCl3-D  
Dina Othman-Benzothiazole Br-proton-CdCl3-D

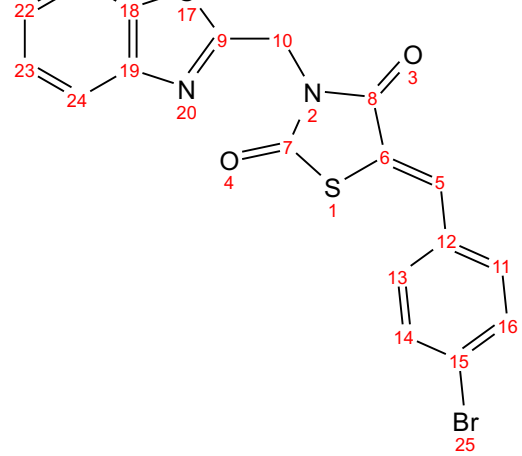

8.1  
8.1  
7.9  
7.9  
7.9  
7.7  
7.6  
7.5  
7.5  
7.5  
7.4  
7.4  
7.4  
7.4  
5.4

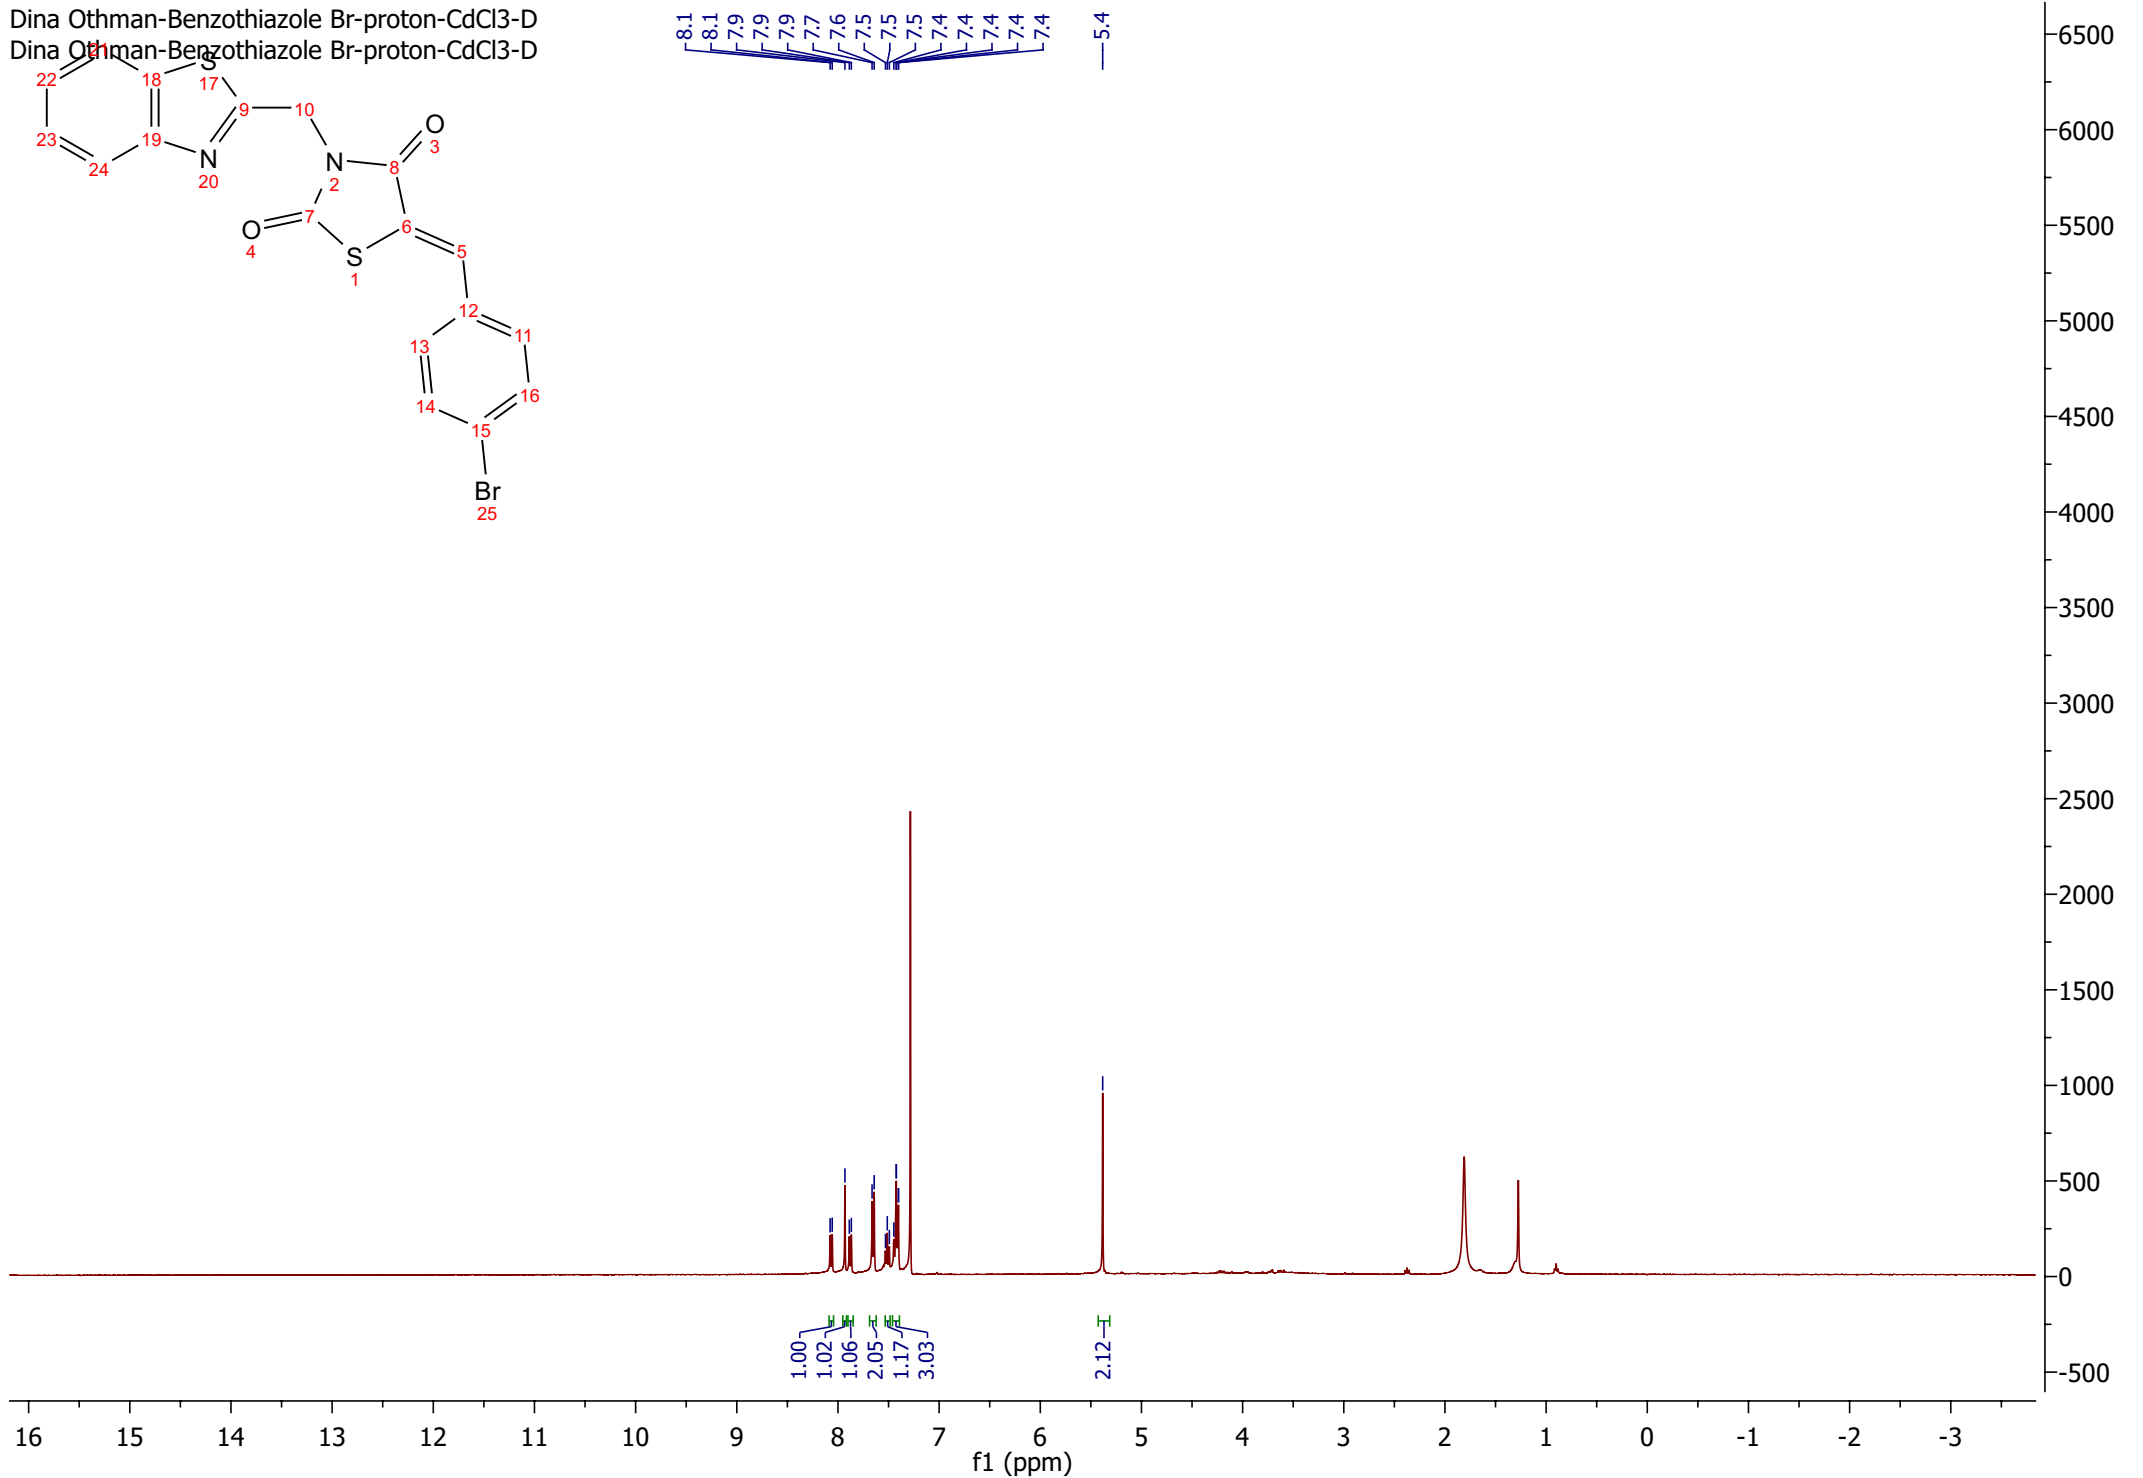

Abdelrahman hamdy- AA25-Hnmr-ow  
Abdelrahman hamdy- AA25-Hnmr

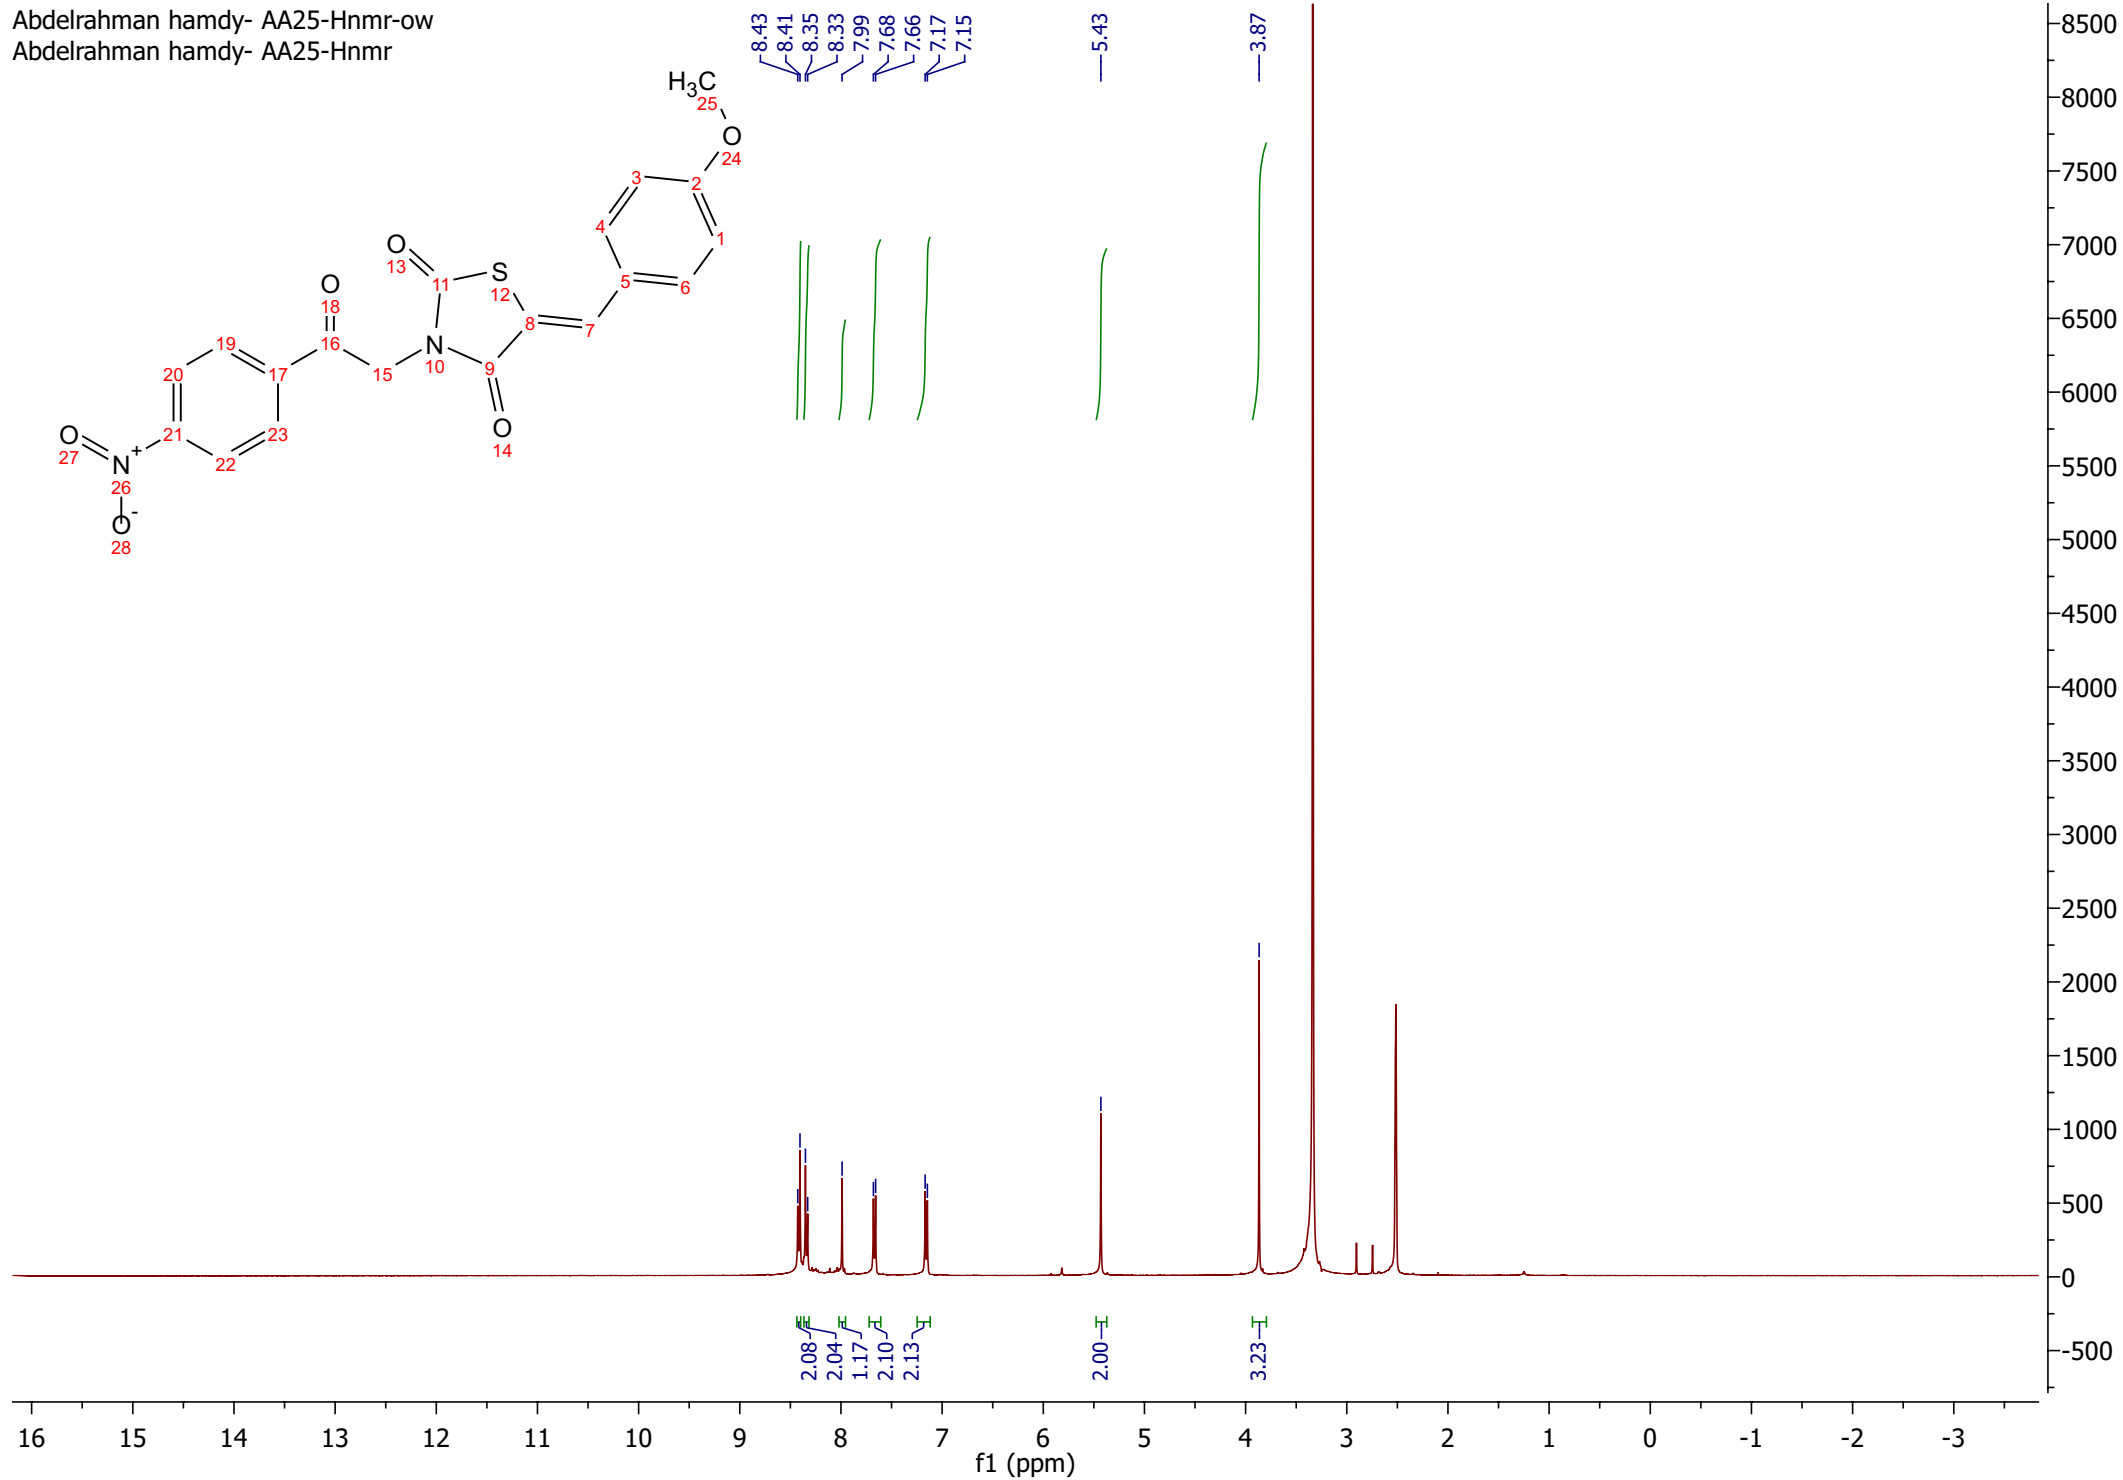

Abdelrhman hamdy-AA03-carbon-ES  
Abdelrhman hamdy-AA03-carbon-ES

151.1  
148.3

139.5  
138.7  
132.0  
131.7  
130.4

125.5  
124.8  
124.5

48.9

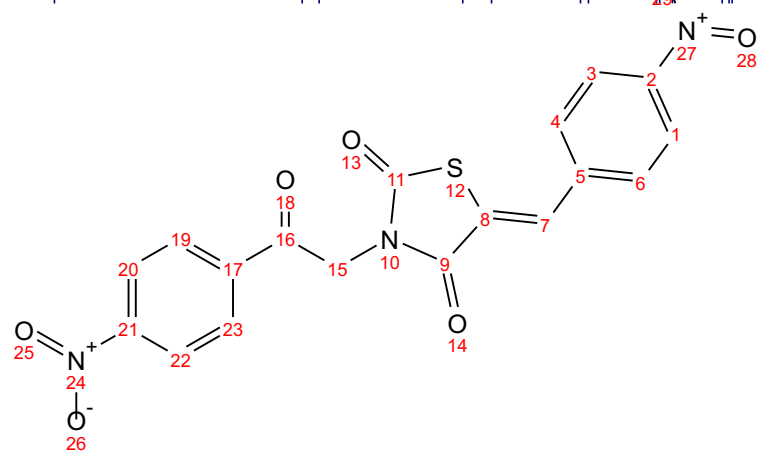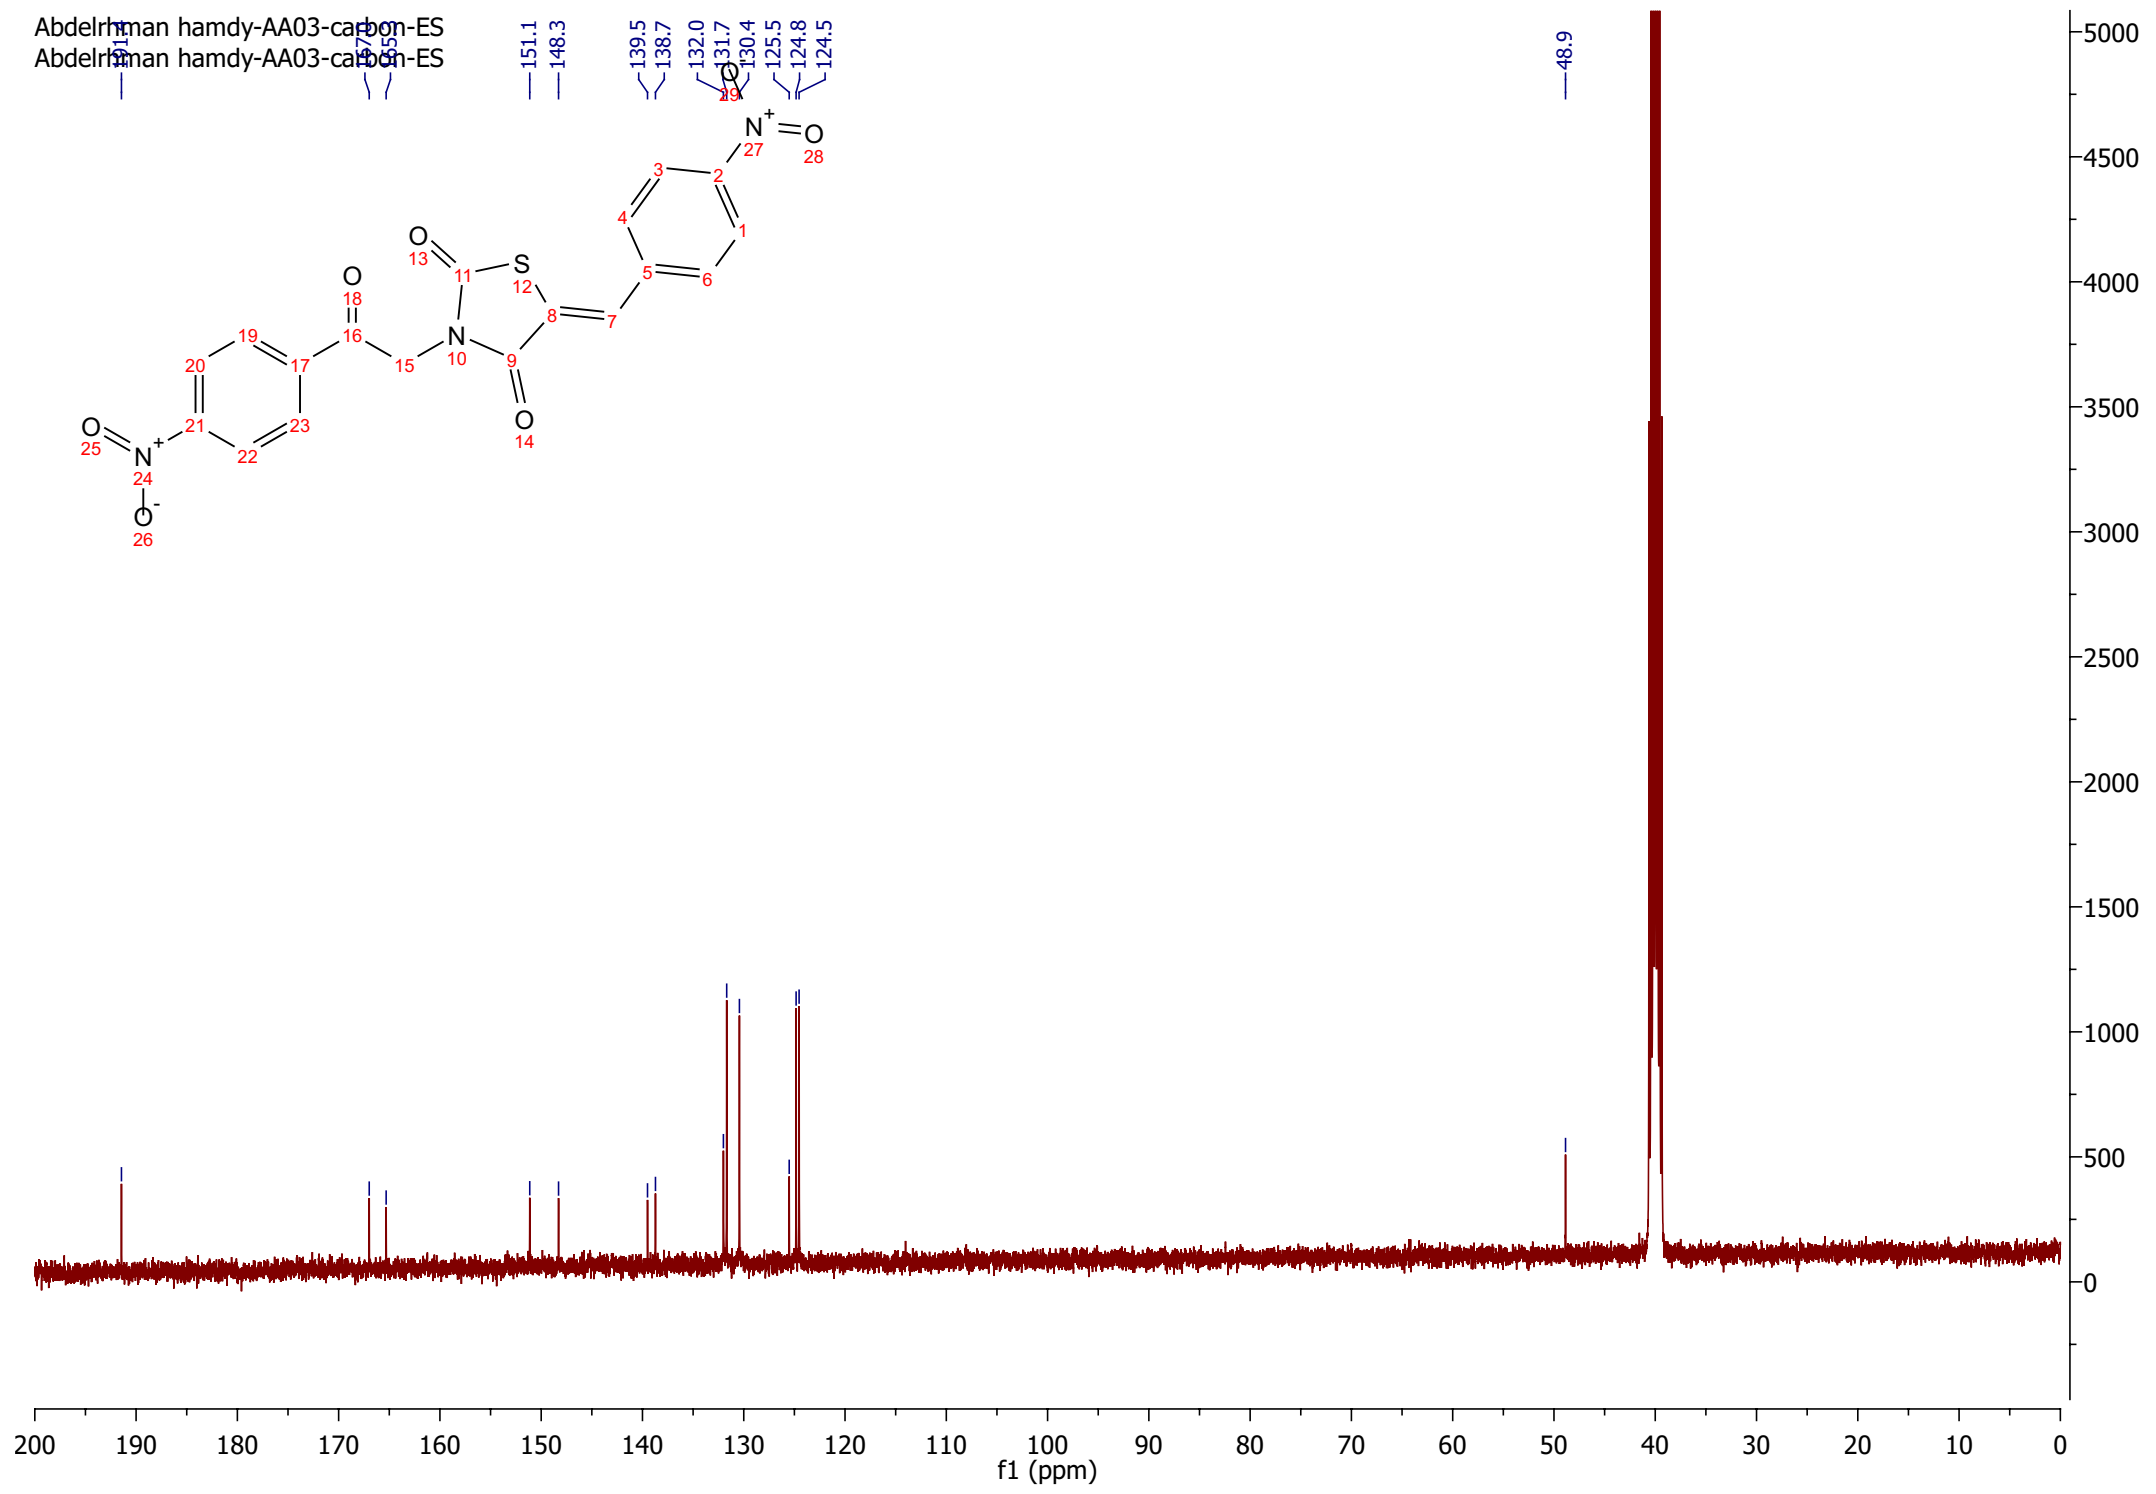



Abdelrhman hamdy-AA07-carbon-ES  
Abdelrhman hamdy-AA07-carbon-ES

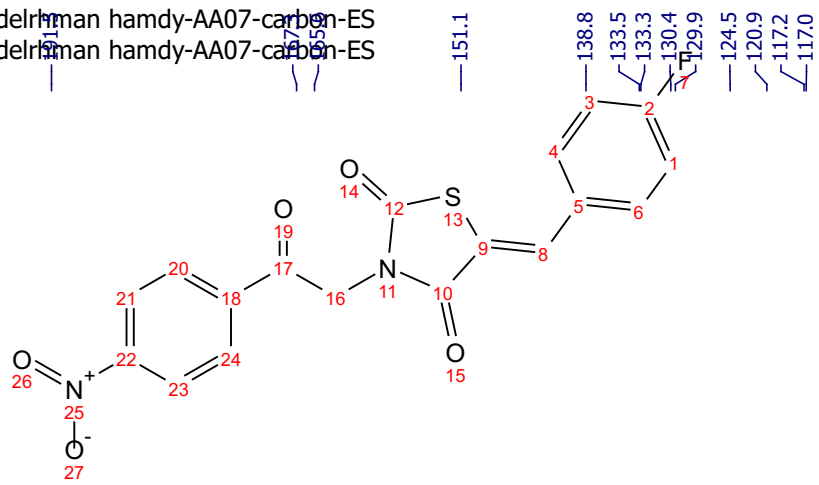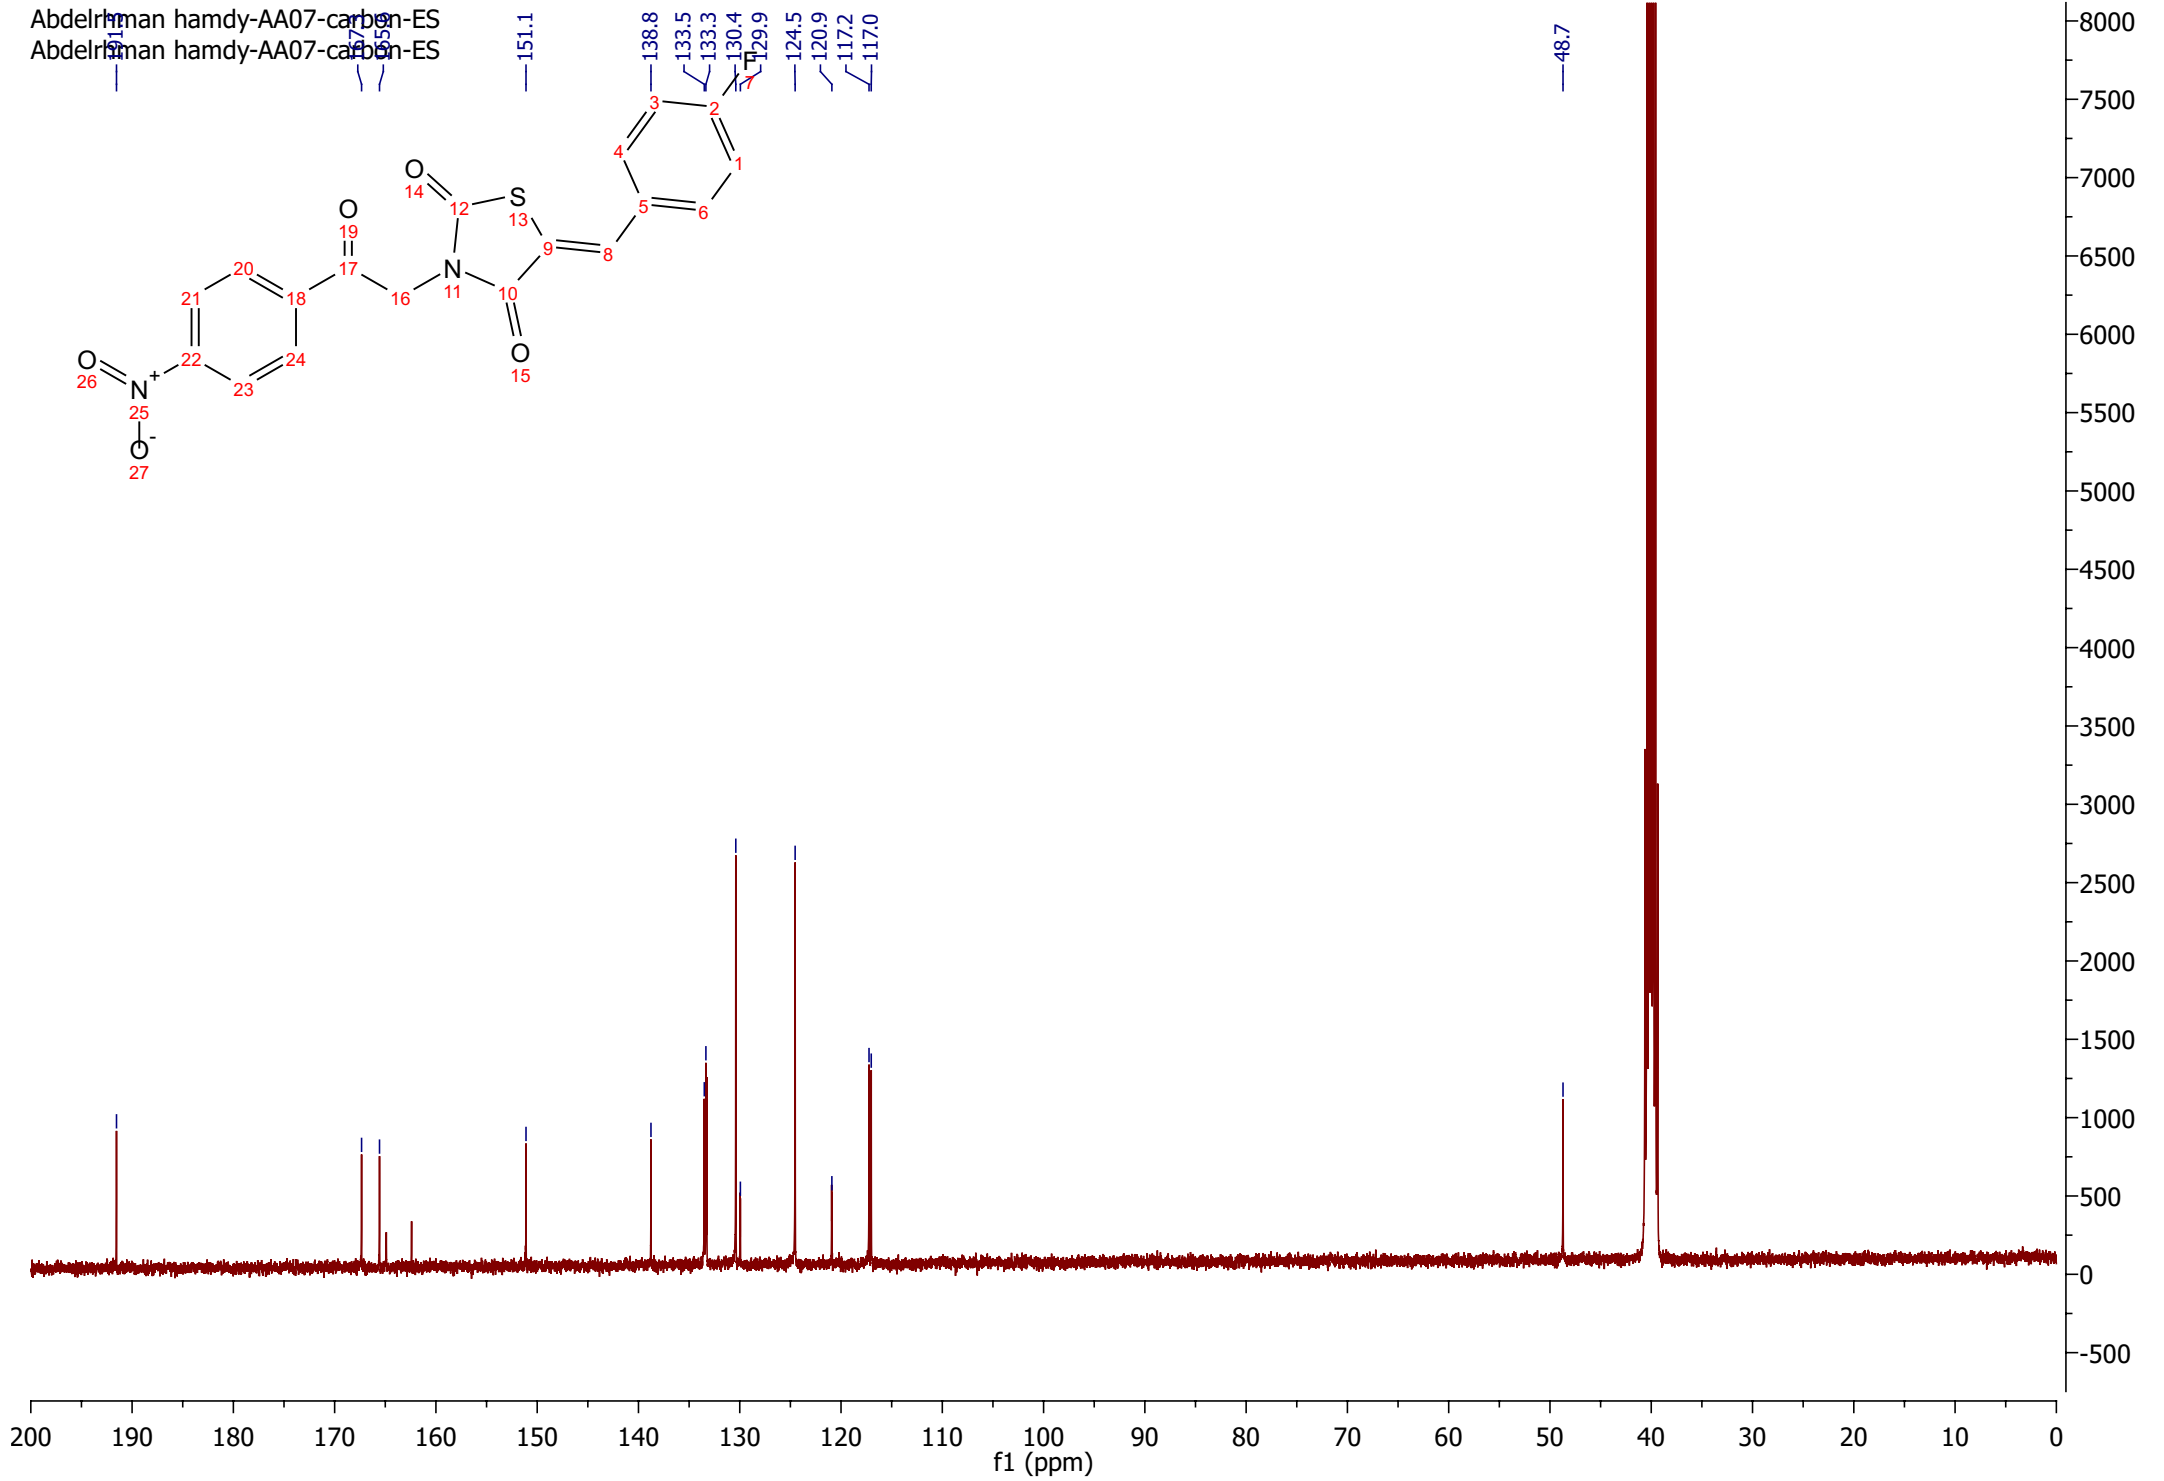

abdelrahman hamdi-AA08-carbon-SA  
abdelrahman hamdi-AA08-carbon-SA

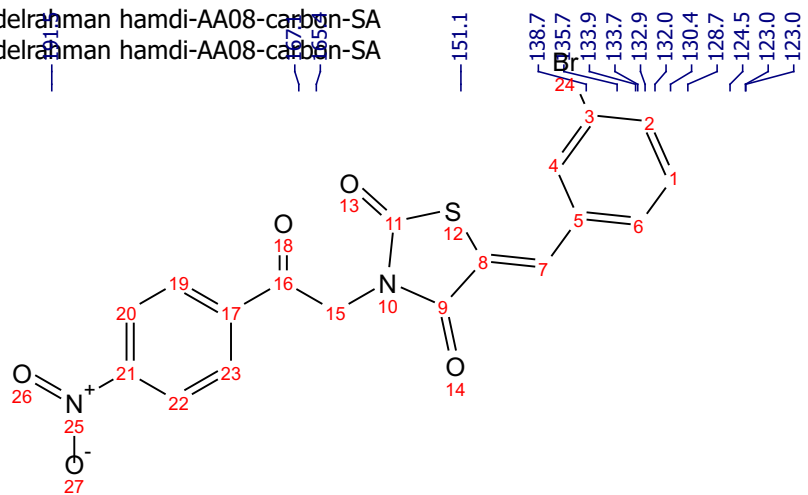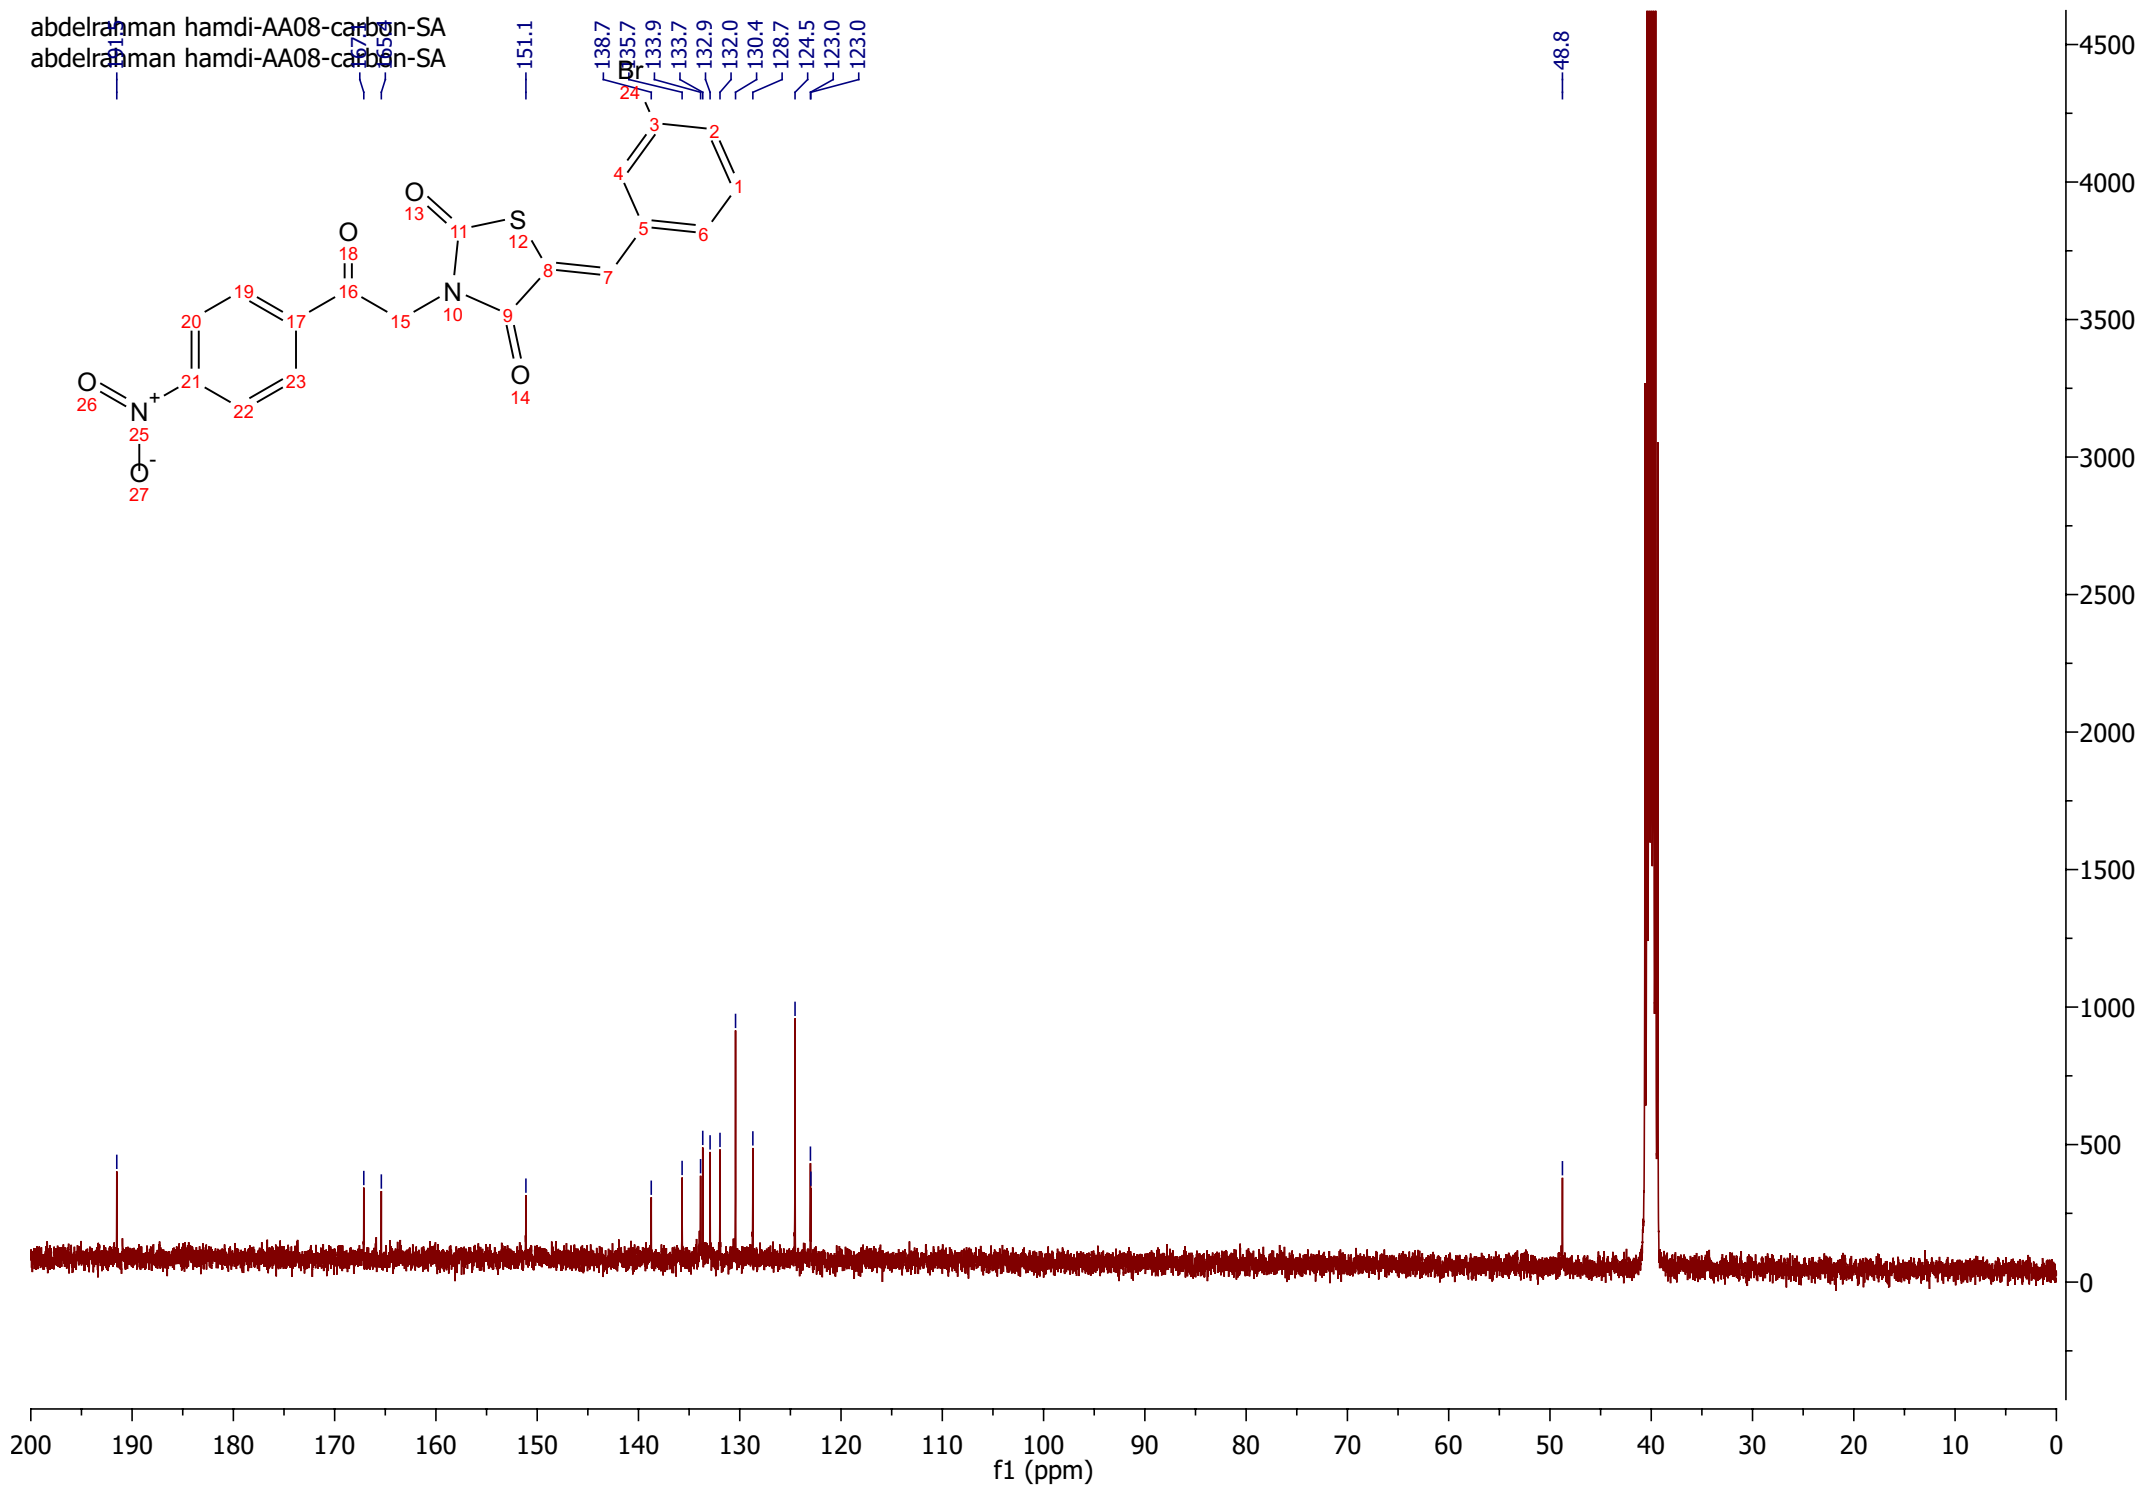

abdelrahman hamdi-AA-10-carbon-SA  
abdelrahman hamdi-AA-10-carbon-SA

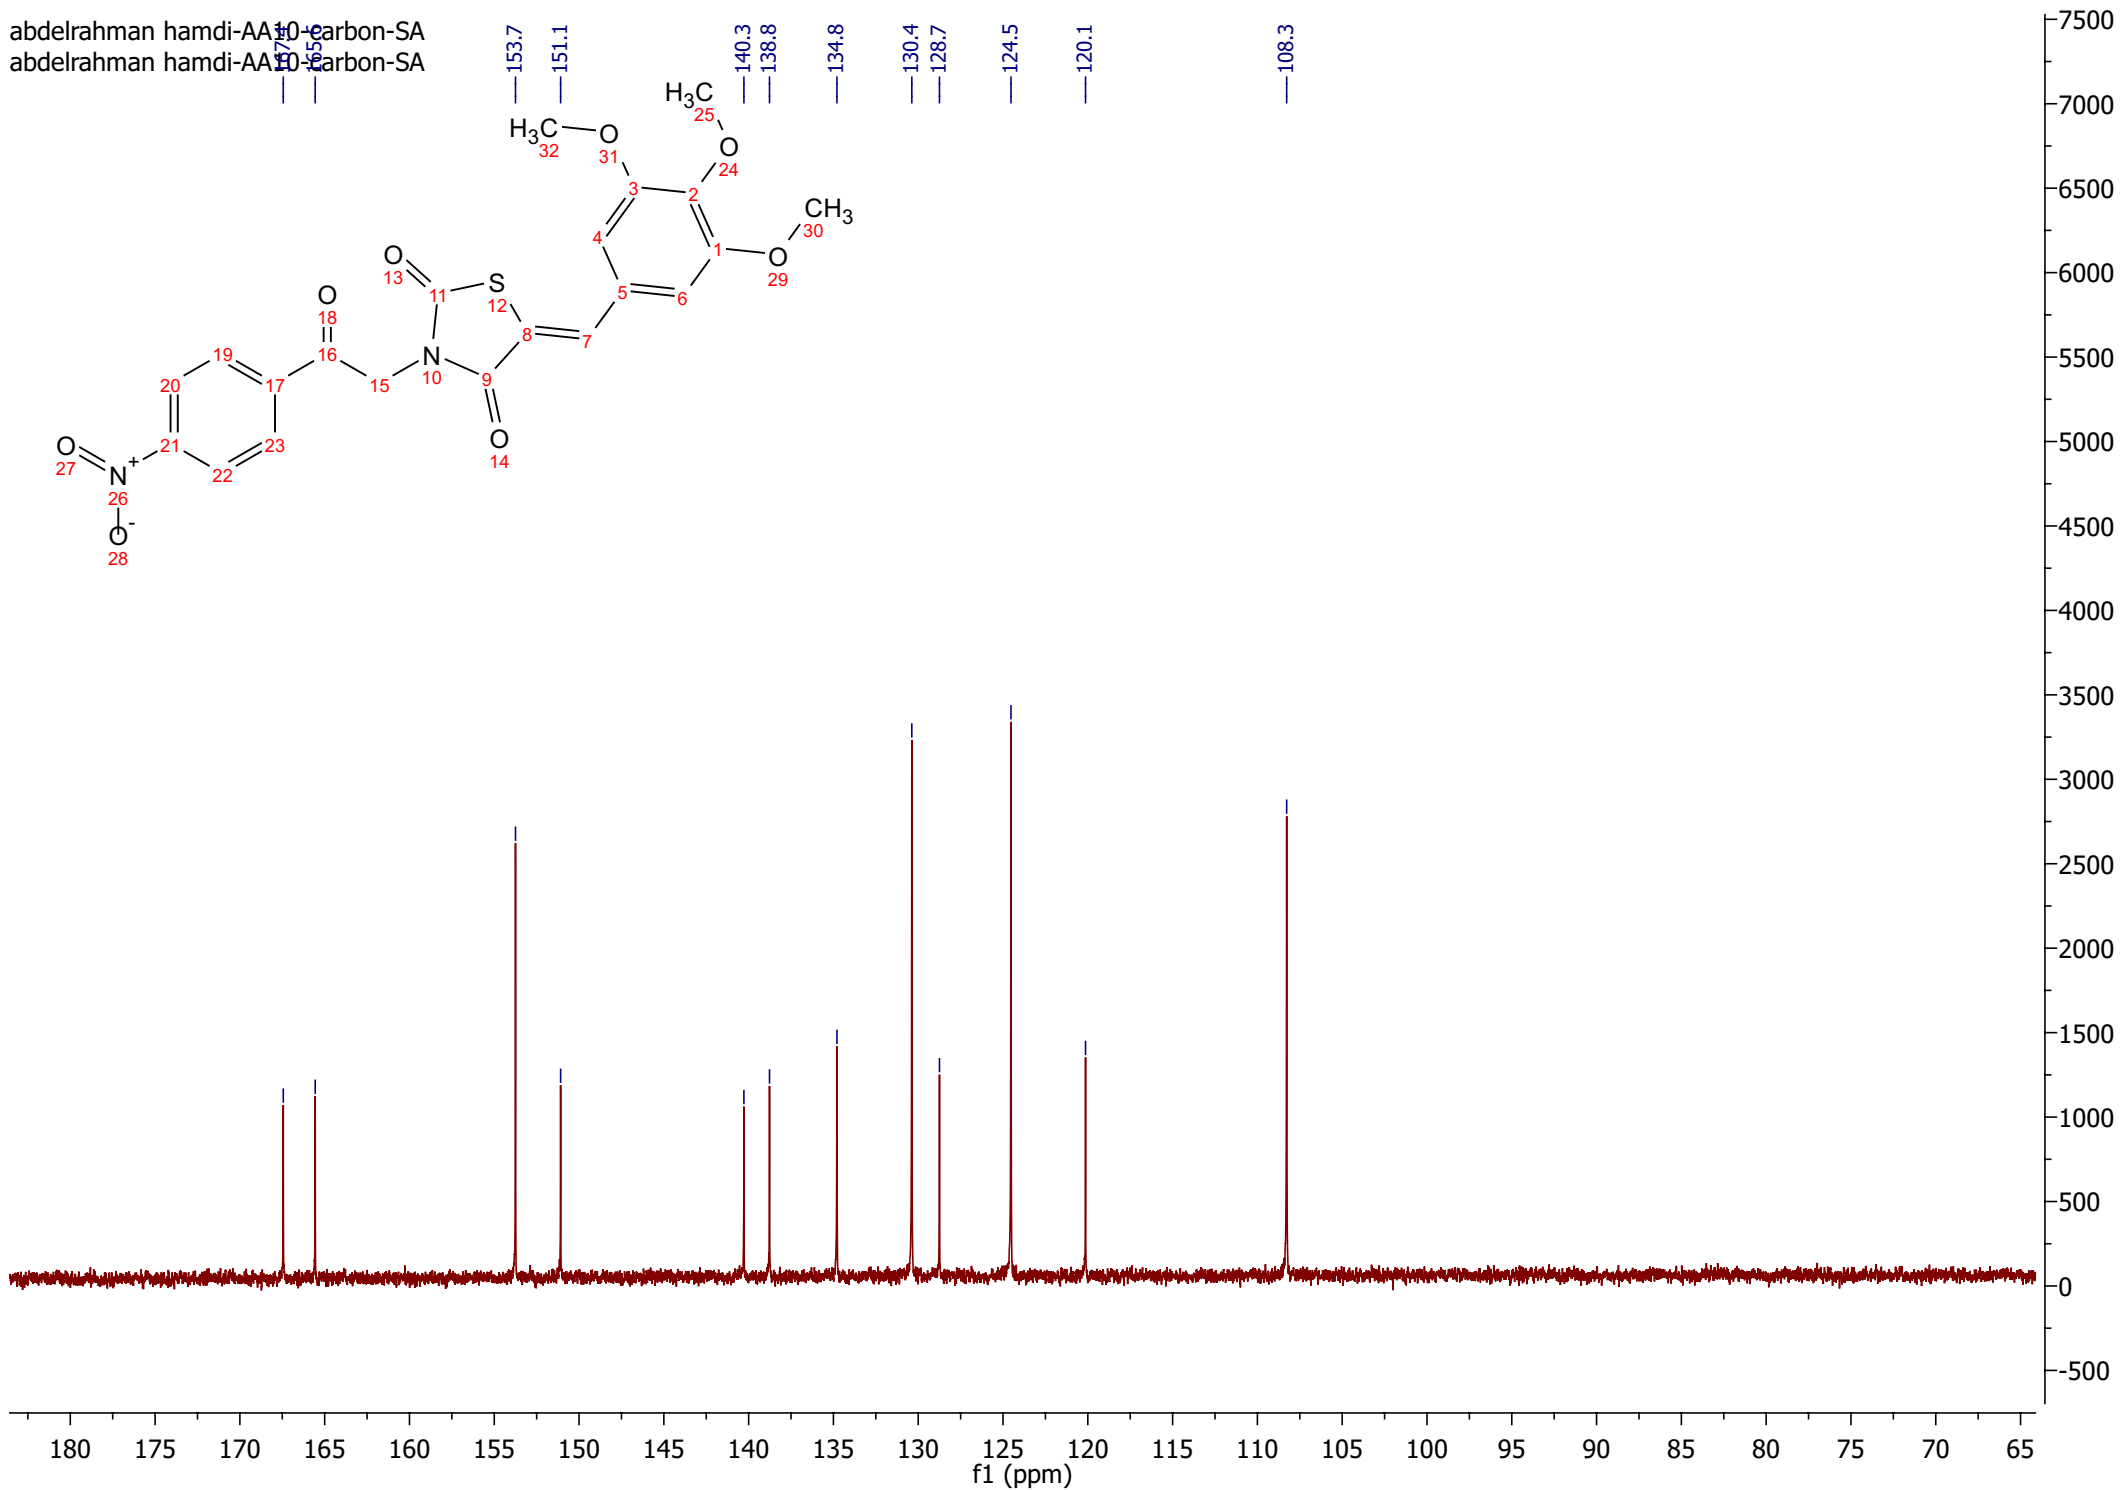

abdelrahman hamdy-AA18-Orinow  
abdelrahman hamdy-AA18-Orinow

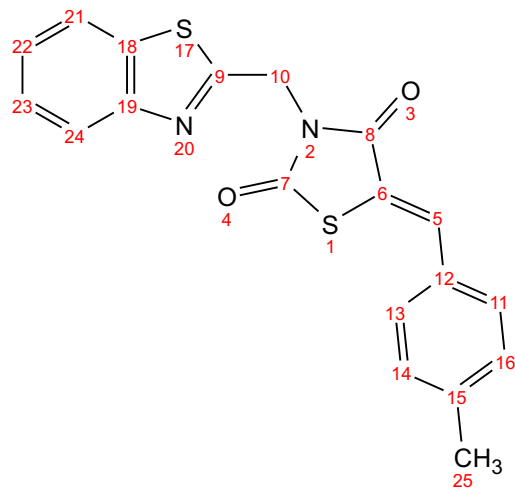

152.5  
141.8  
135.3  
134.7  
130.8  
130.7  
130.6  
126.9  
126.0  
123.2  
122.9  
120.0

43.3  
21.6

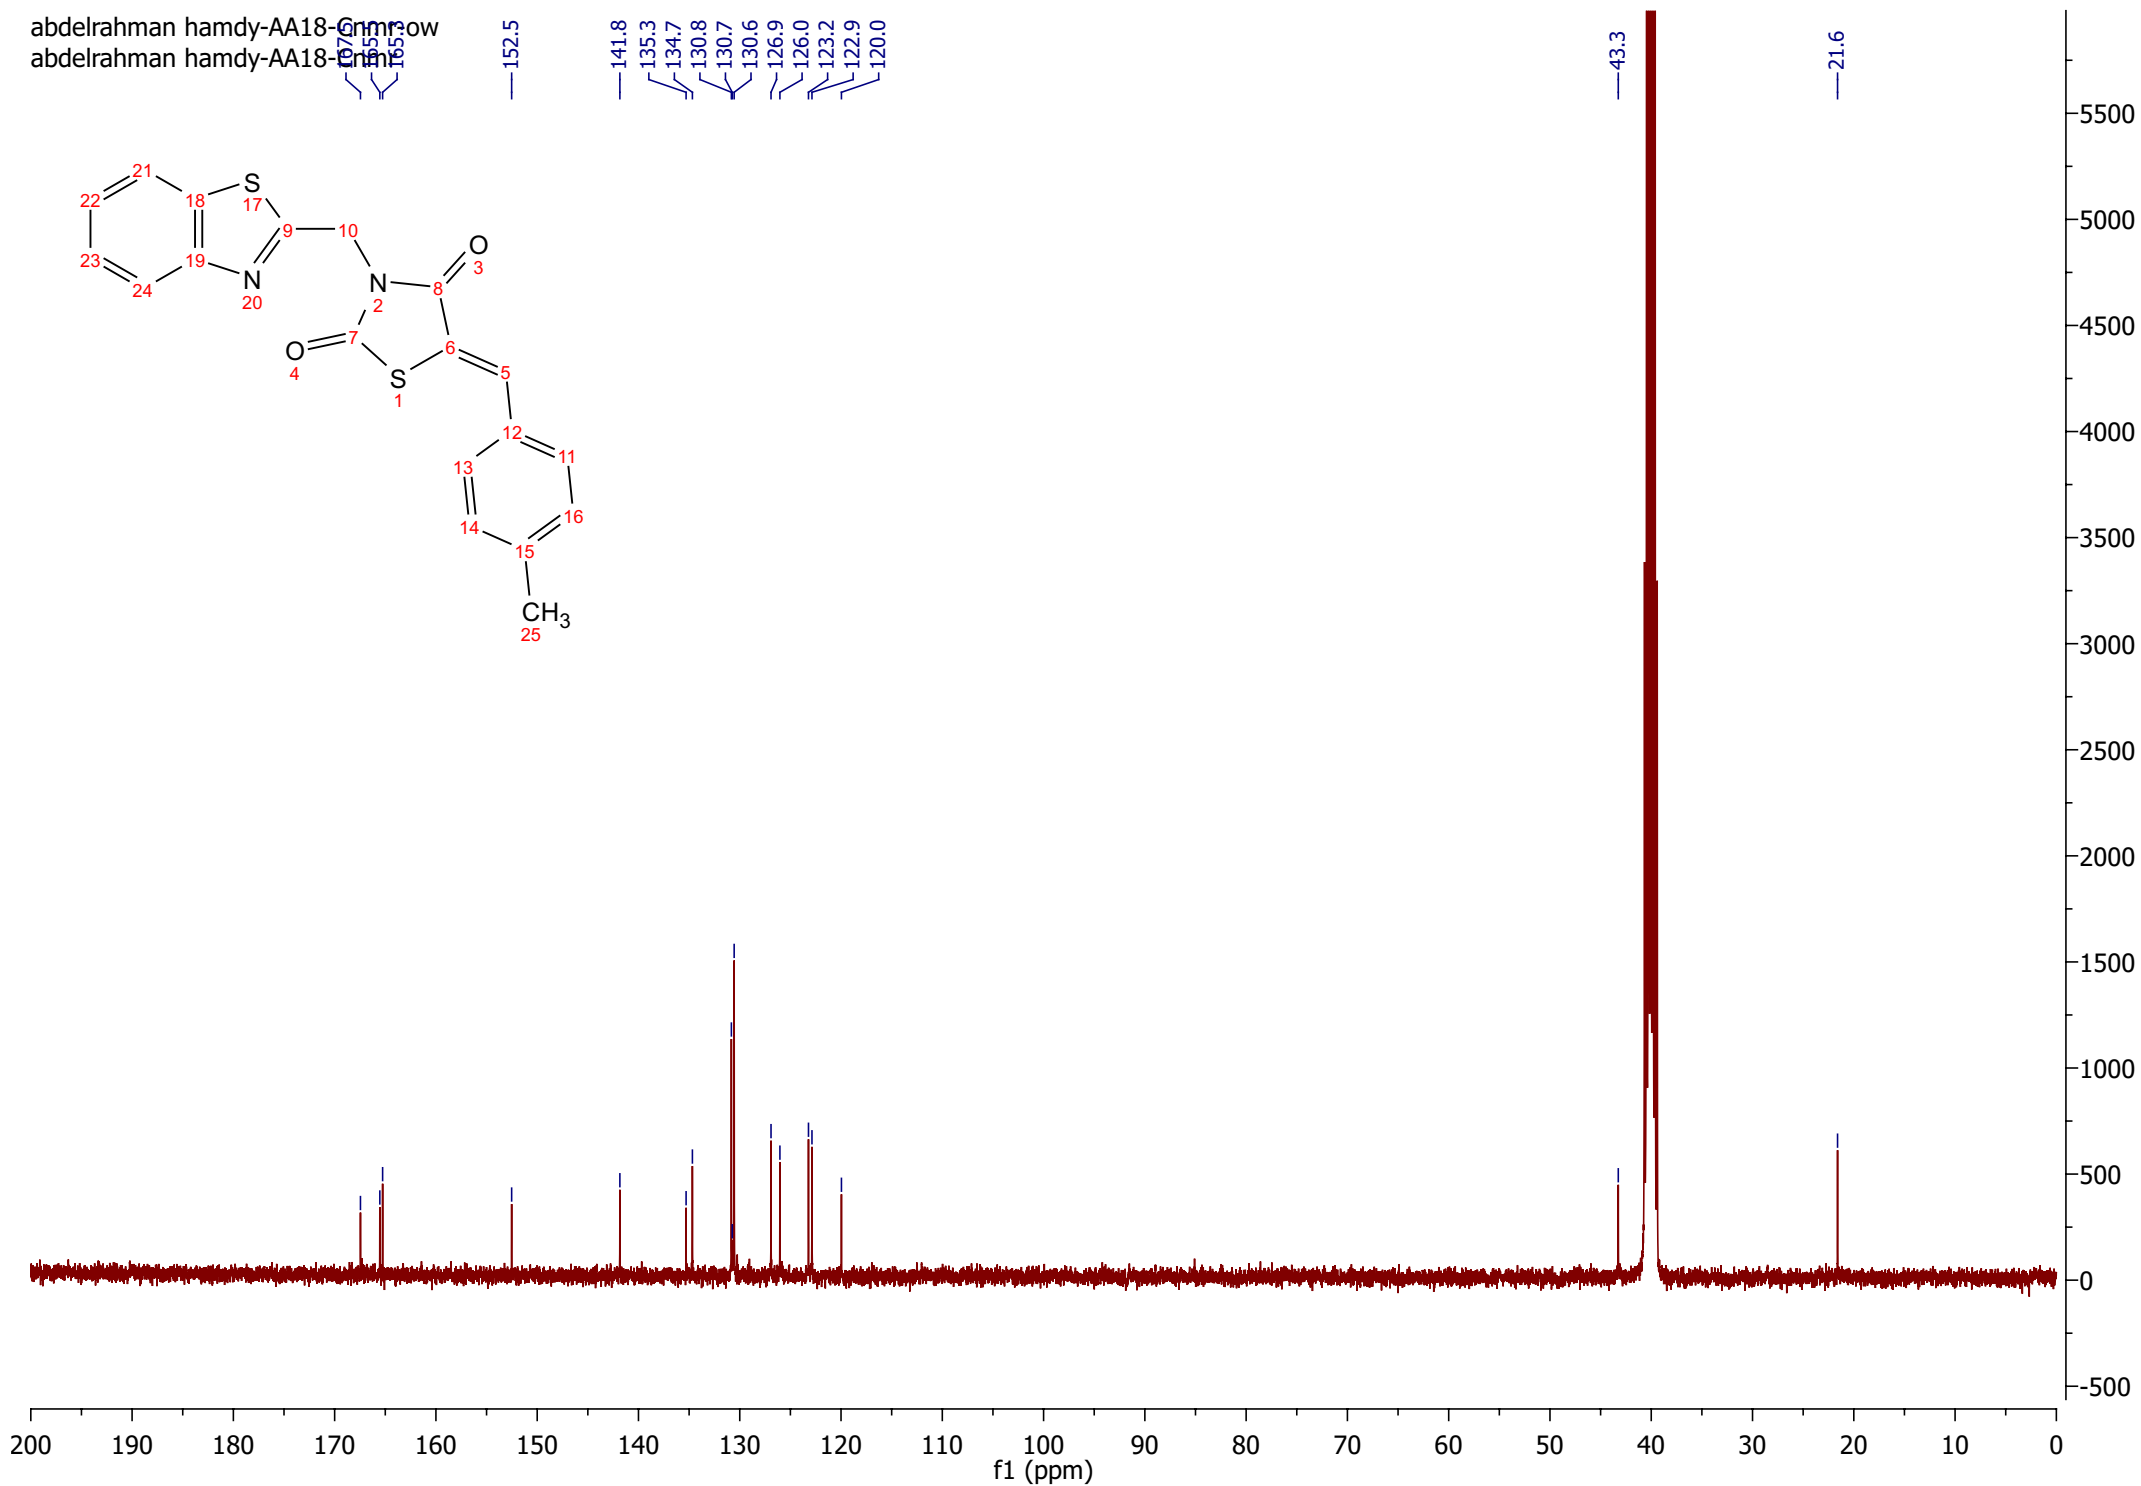

abdelrahman hamdy-AA19-Ornlow  
abdelrahman hamdy-AA19-Ornlow

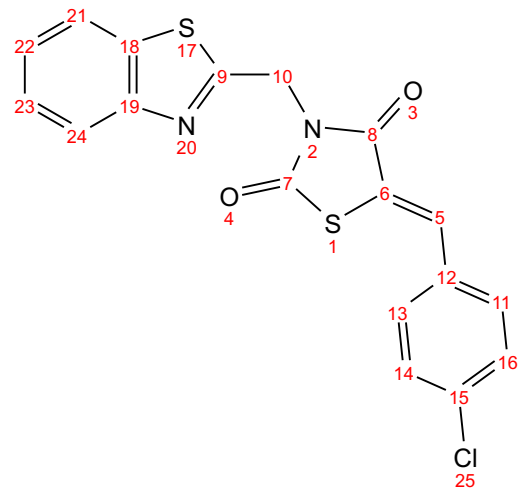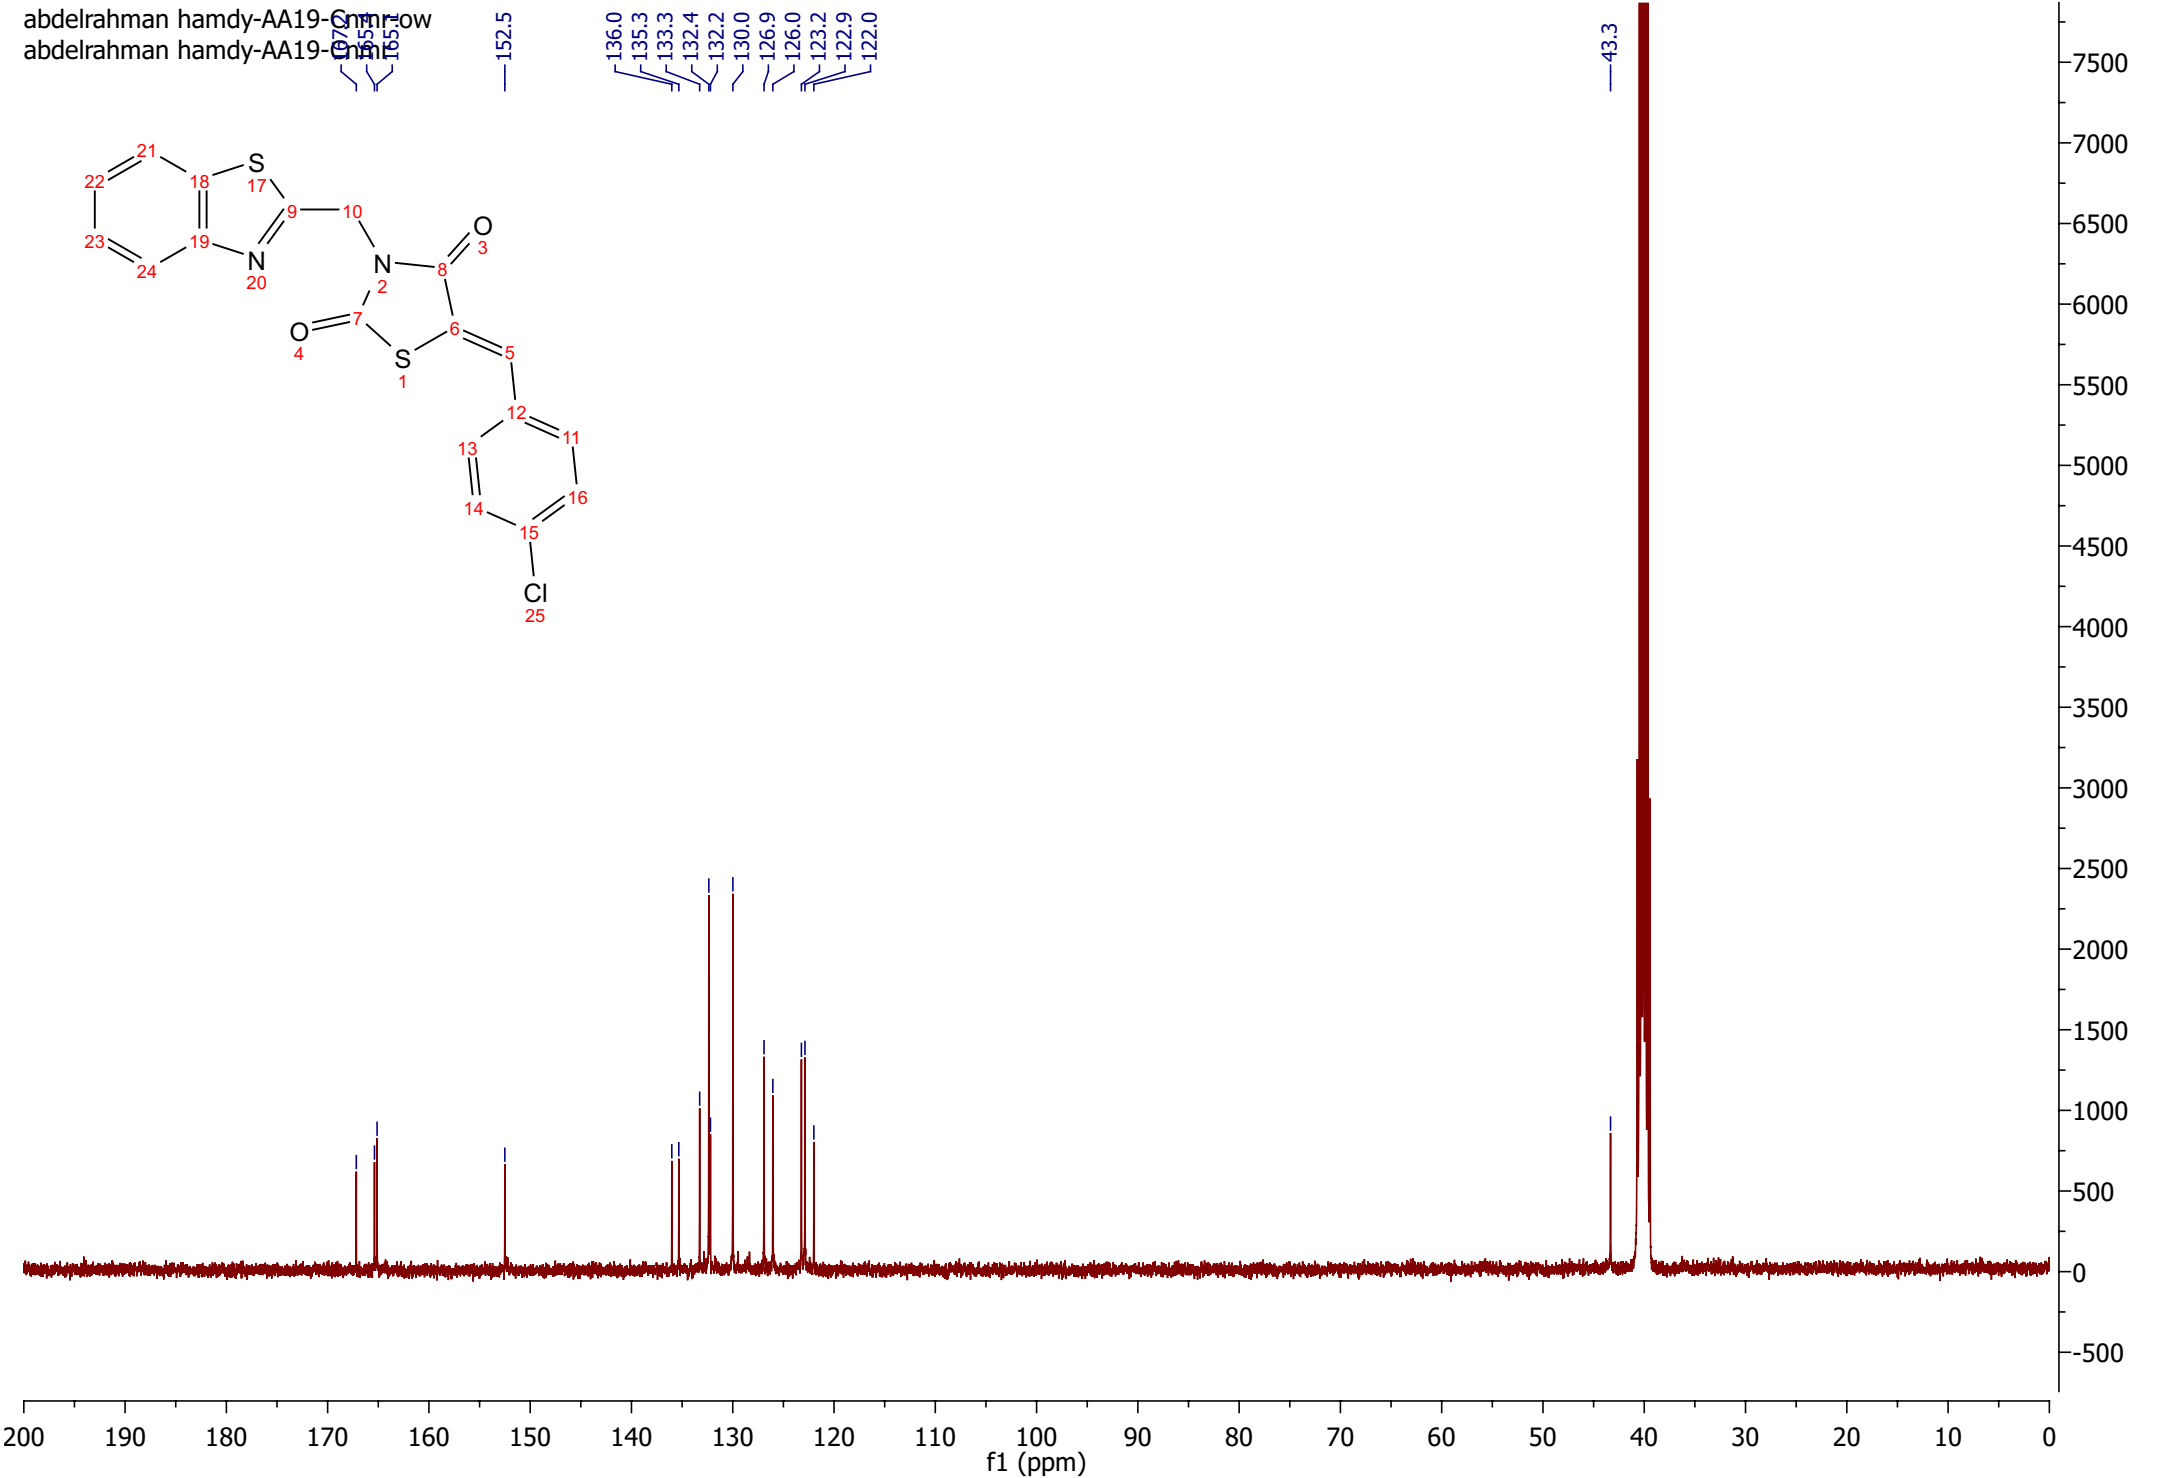

abdelrahman hamdy-AA20-Orinlow  
abdelrahman hamdy-AA20-Orinlow

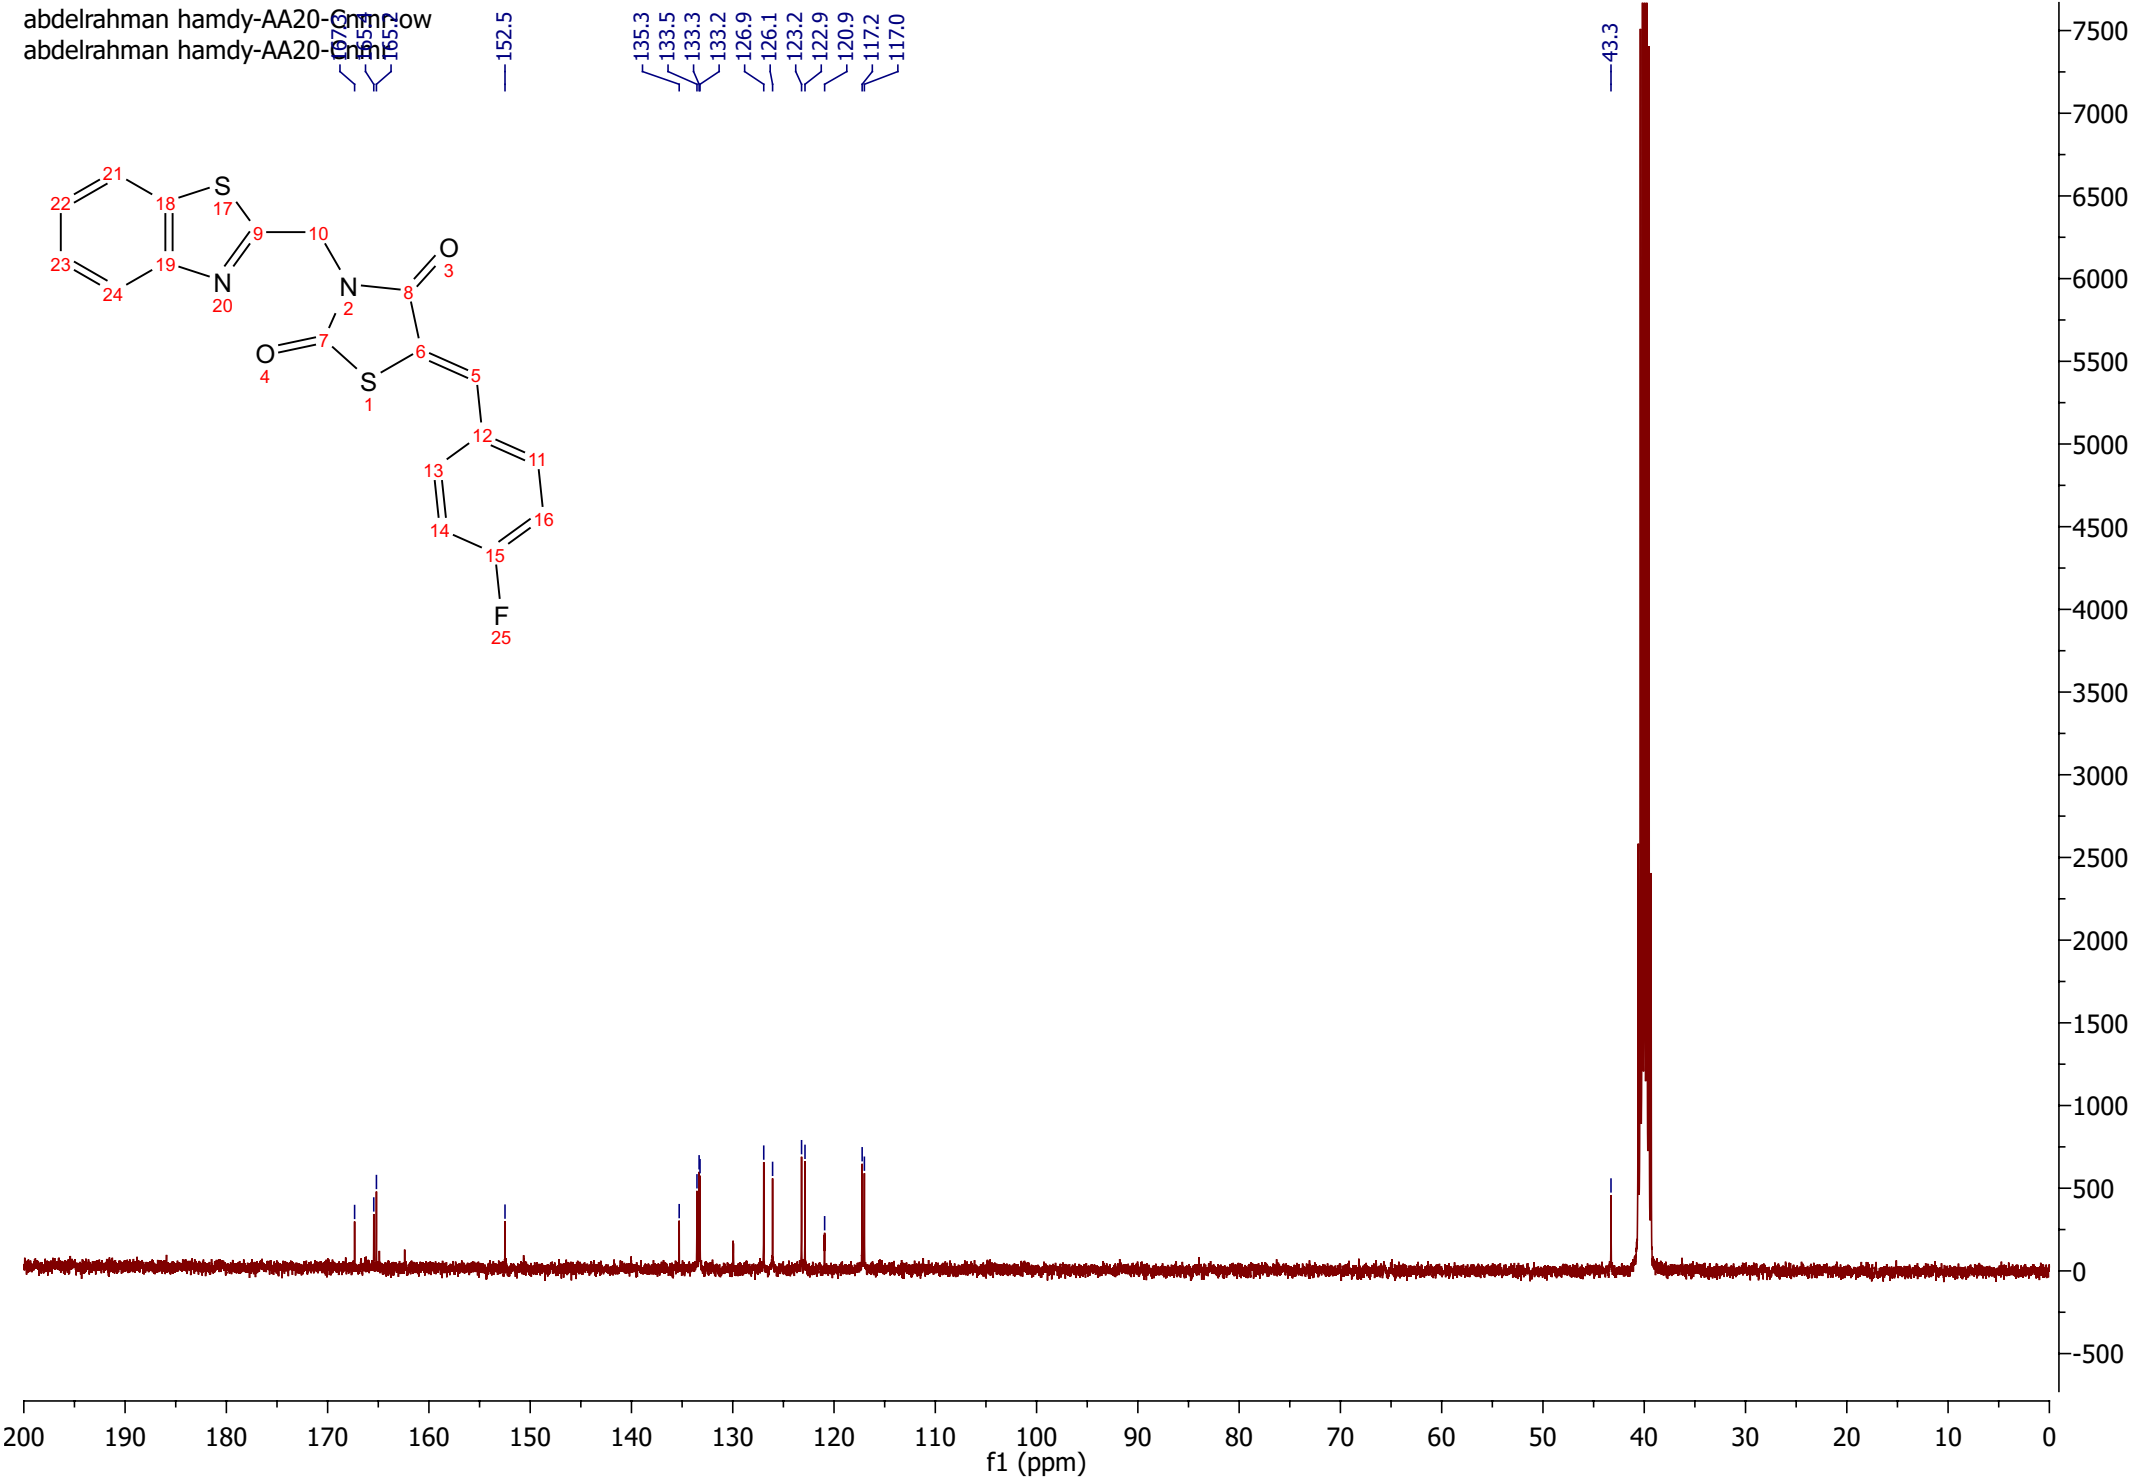

Abdelrahman Hamdi- AA05 carbon-DMSO-D  
Abdelrahman Hamdi- AA05 carbon-DMSO-D

138.76  
136.03  
133.26  
132.39  
132.19  
130.40  
130.00  
124.53  
121.98

48.75

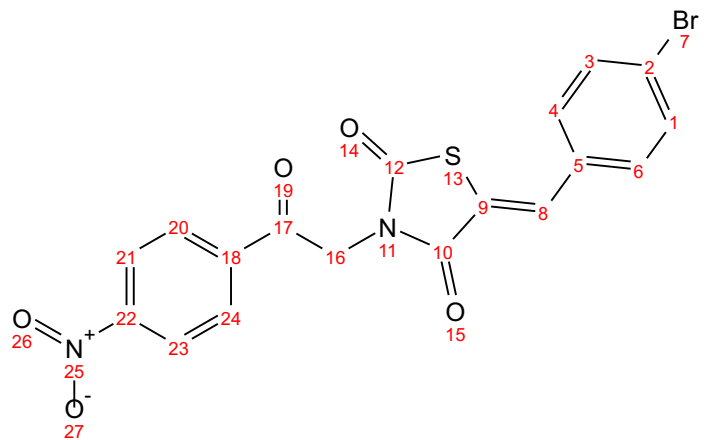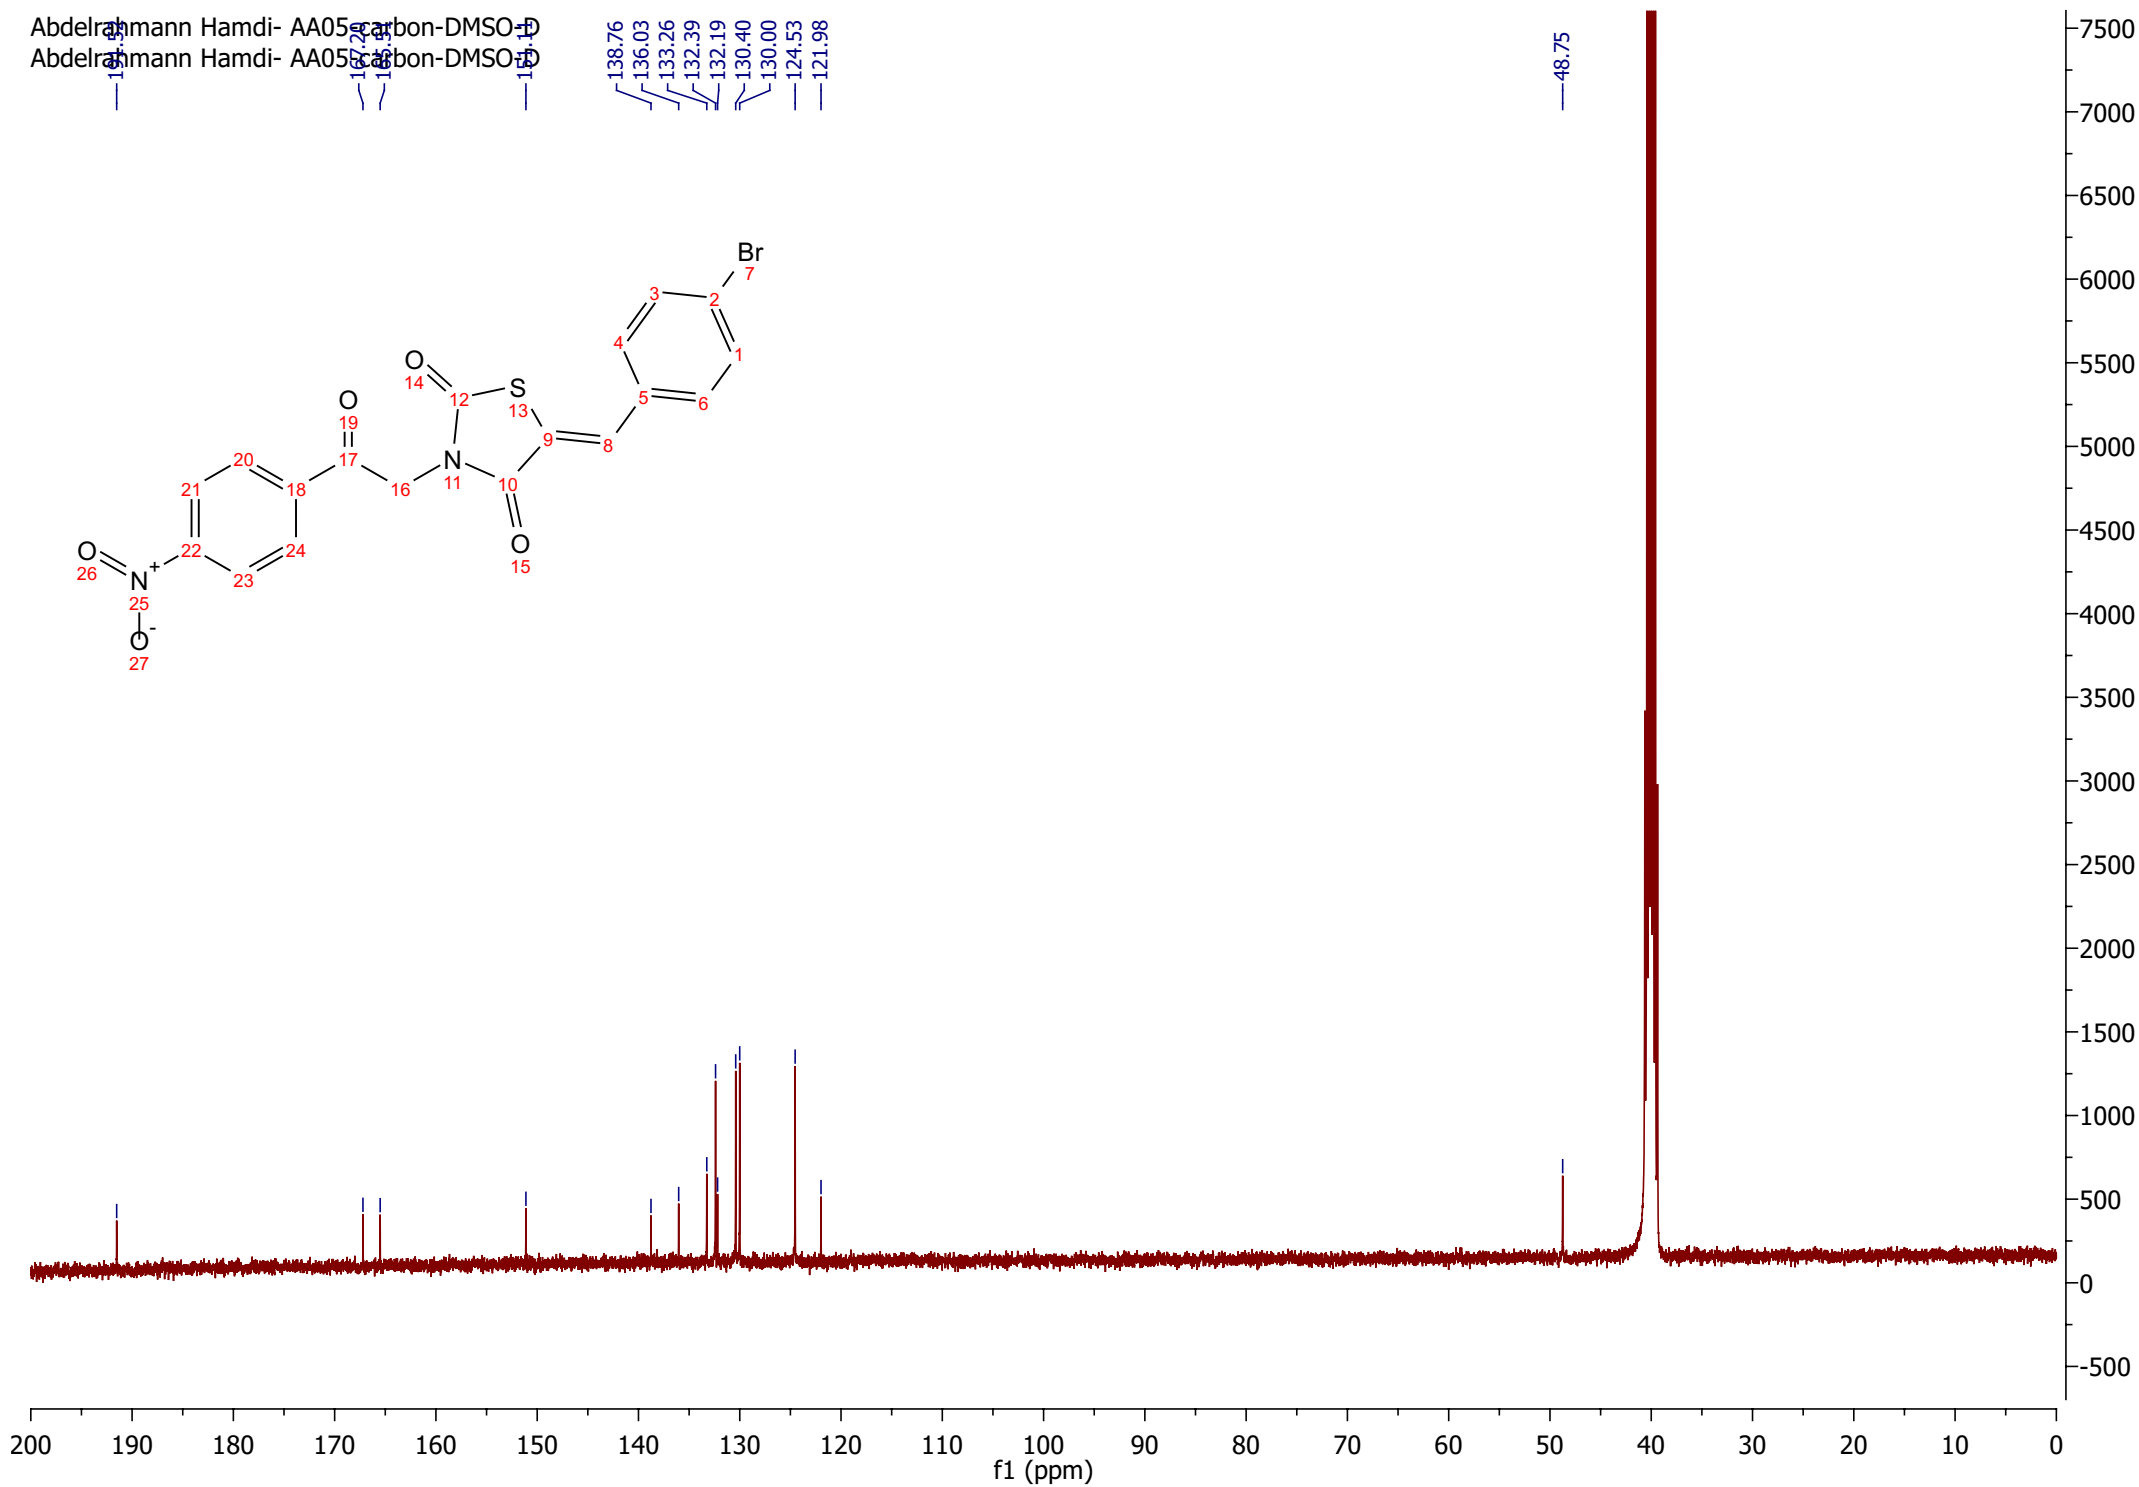

Abdelrahmann Hamdi- AA21 Carbon-DMSO-D  
Abdelrahmann Hamdi- AA21 Carbon-DMSO-D

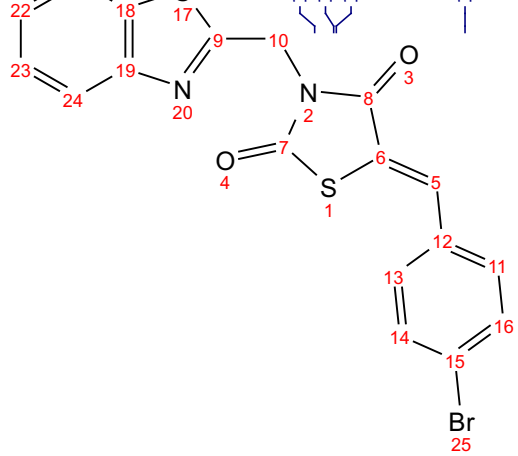

135.31  
133.53  
133.34  
133.25  
129.99  
126.92  
126.05  
123.21  
122.89  
120.91  
117.24  
117.02

43.29

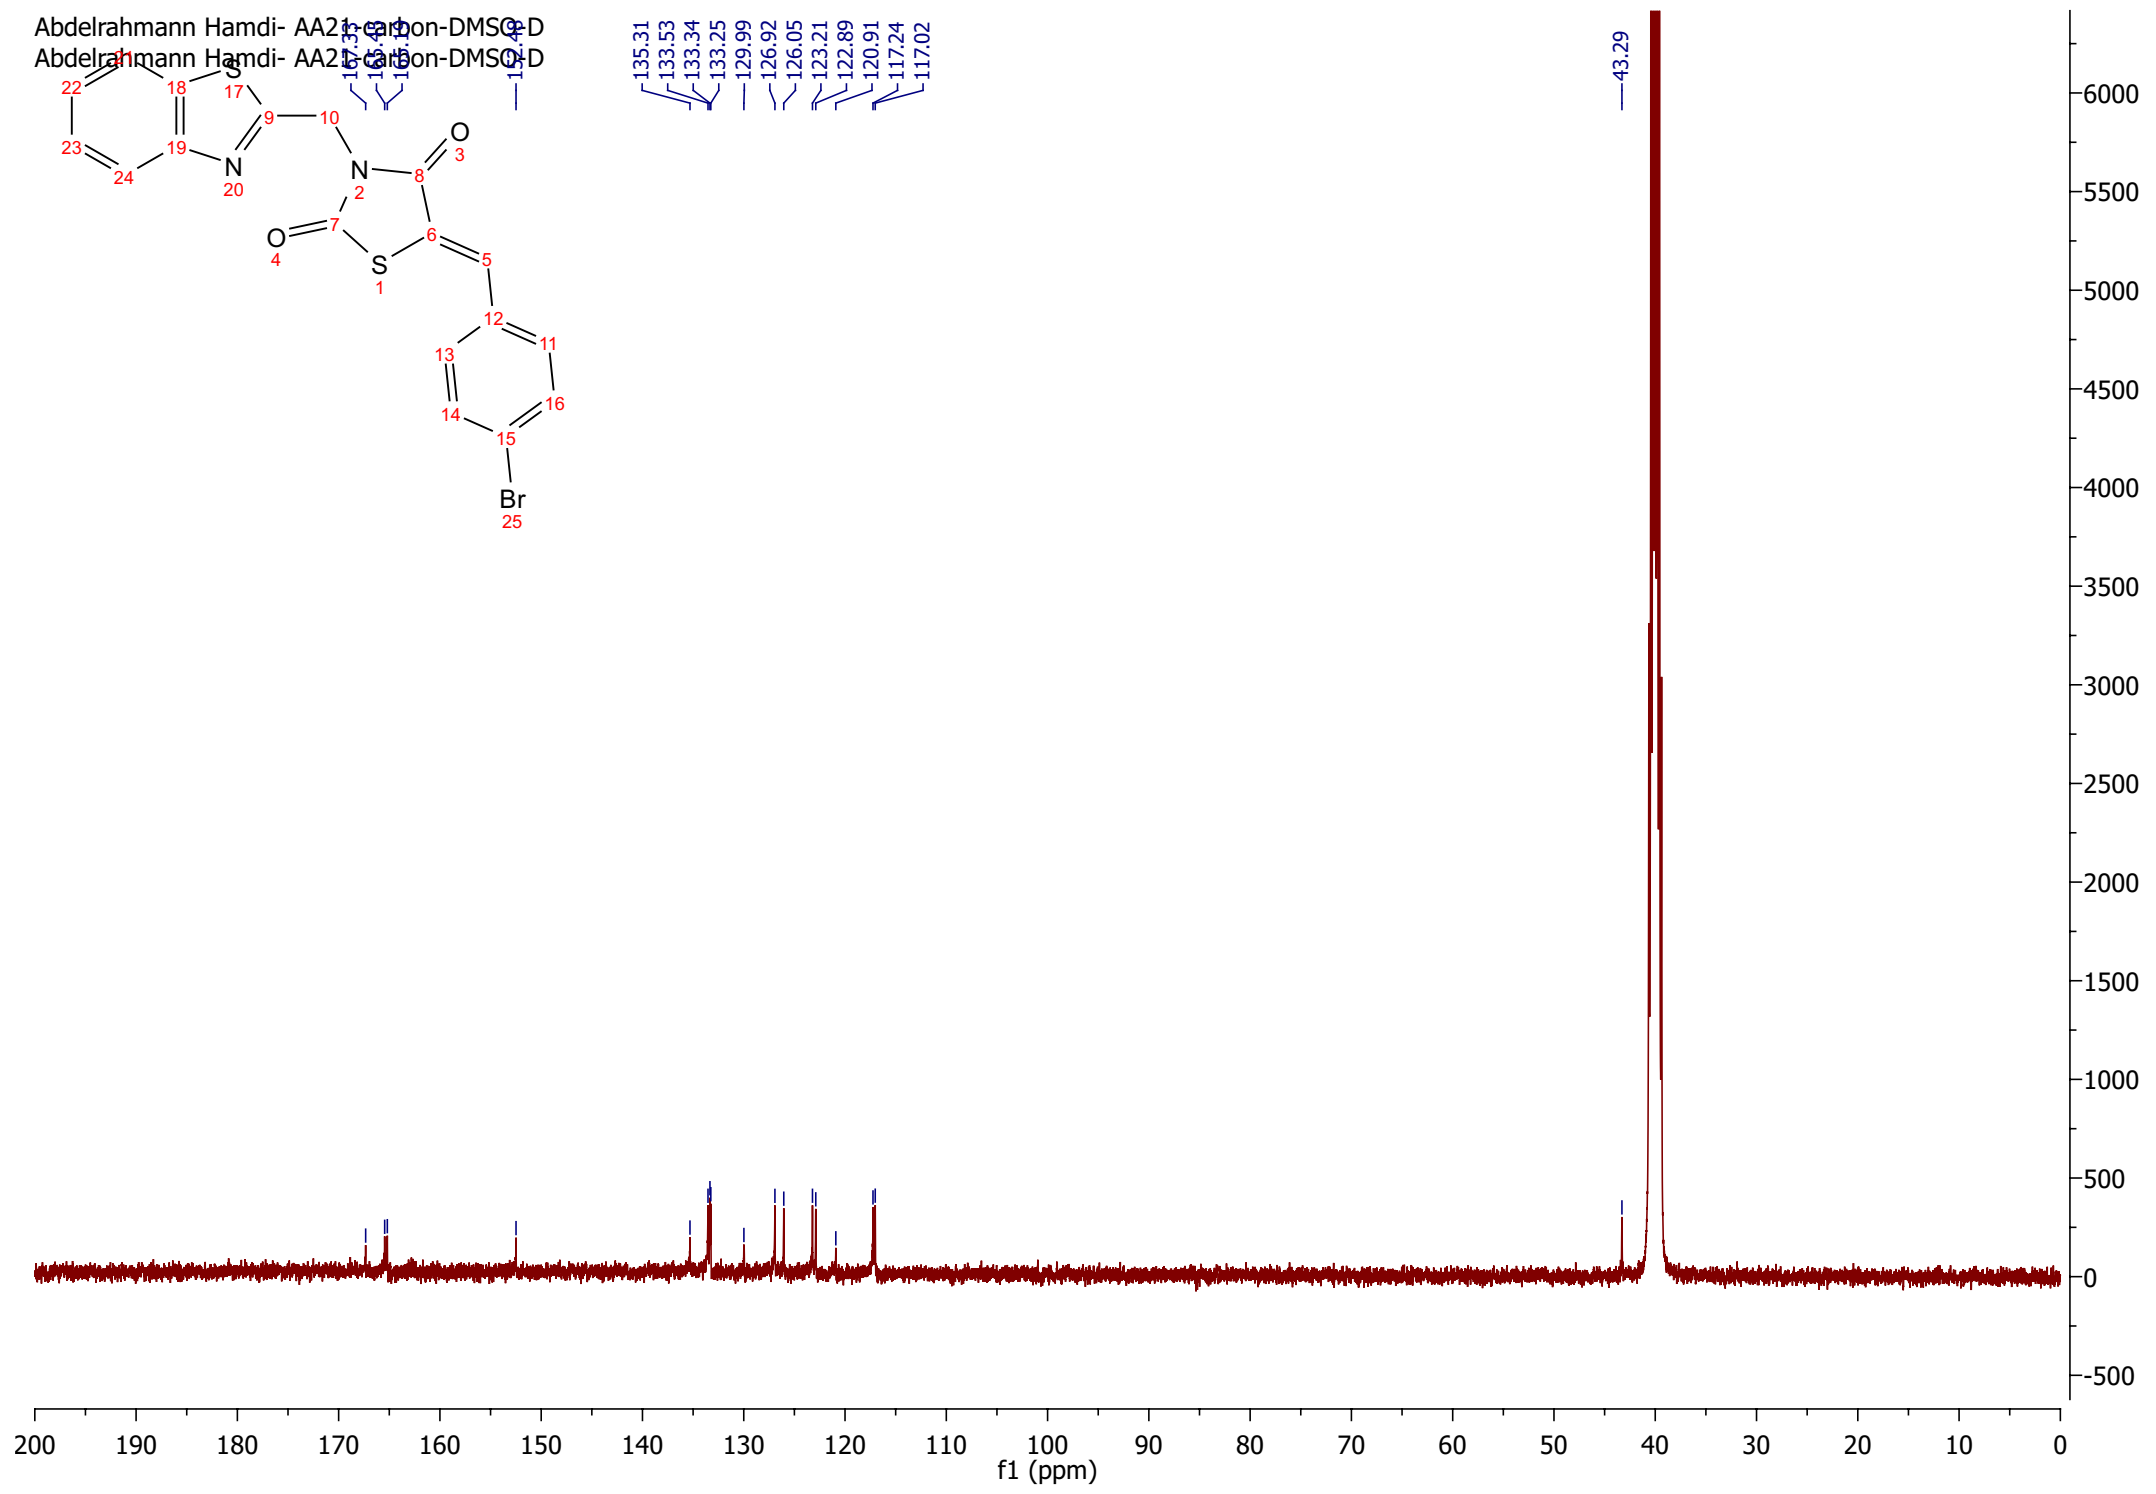



Abdelrahman Hamdy-AA23-013-9R  
Abdelrahman Hamdy-AA23-013-9R

152.45  
148.25  
139.49  
135.36  
131.97  
131.65  
131.12  
126.92  
126.06  
124.80  
123.22  
122.88  
43.41

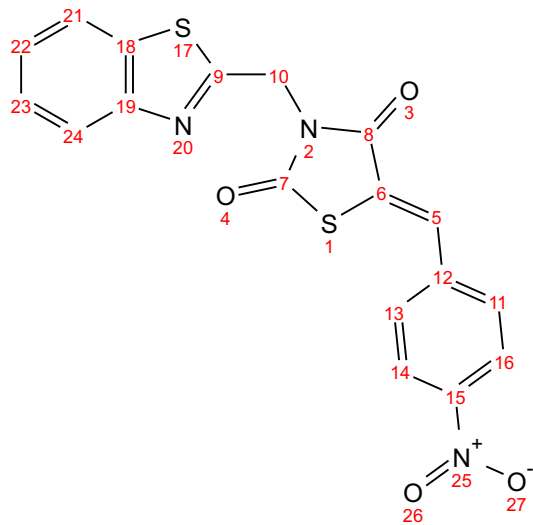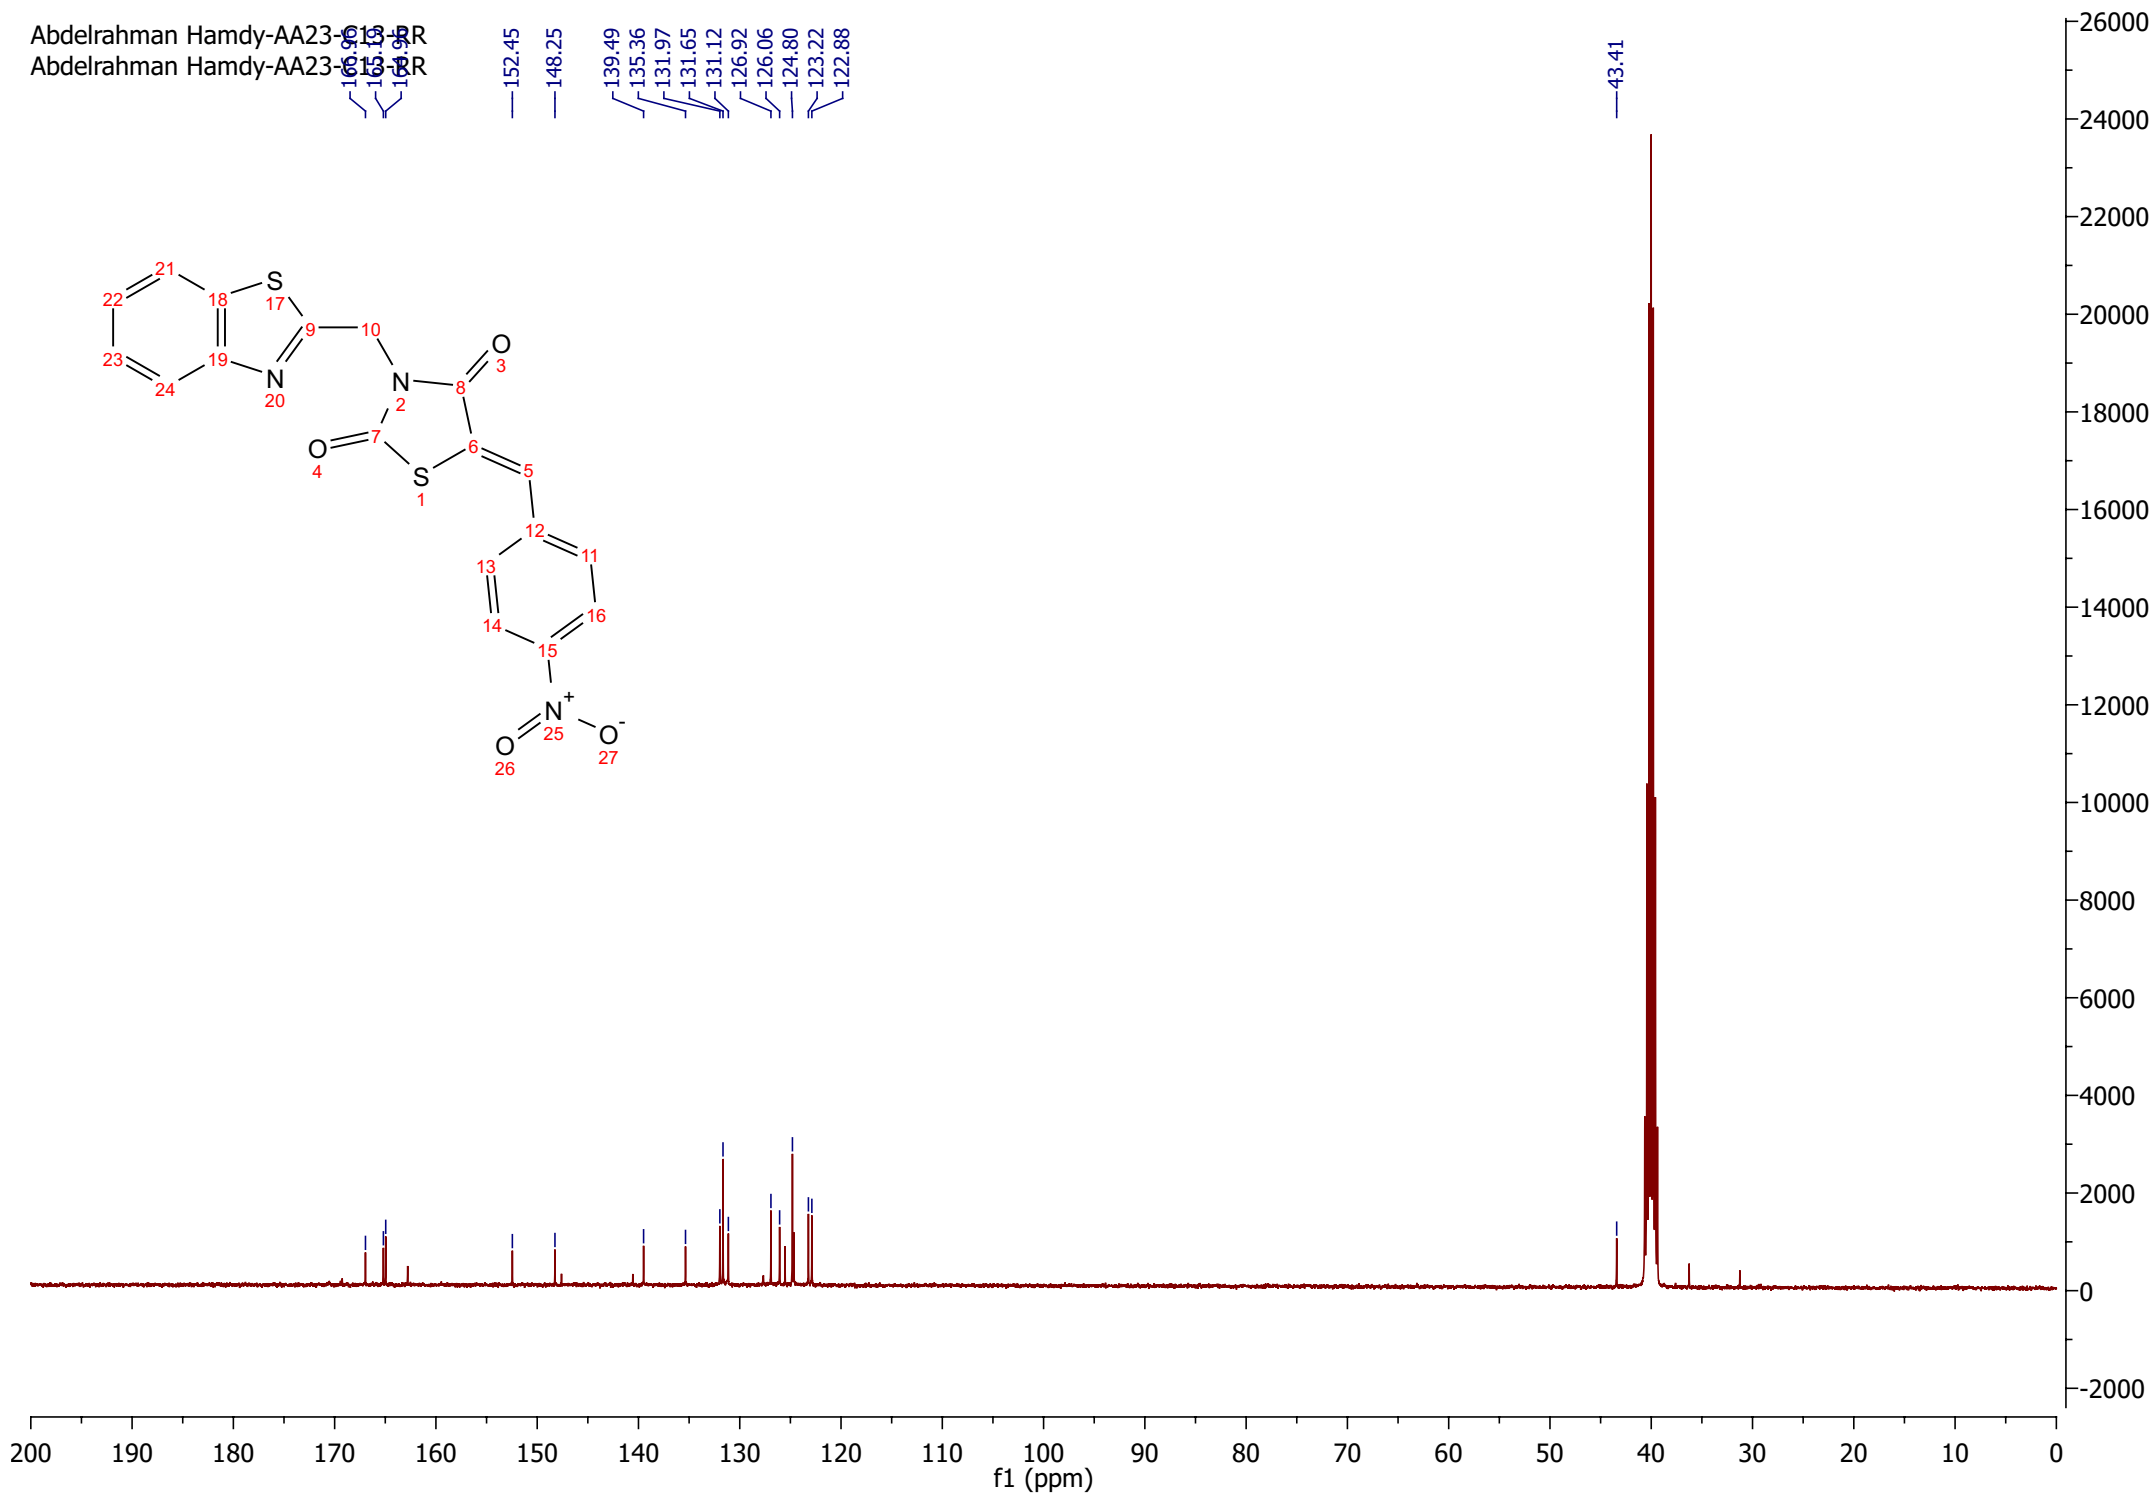

Abd rahman hamdy  
Abd rahman hamdy

25 -M c13  
25 -M c13

167.54  
165.73  
161.92  
151.10  
138.82  
134.56  
132.96  
130.37  
125.74  
124.54  
117.87  
115.56

56.05  
48.63

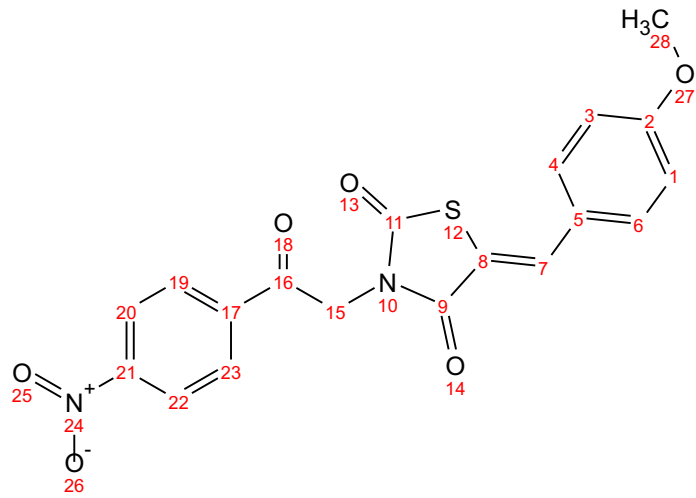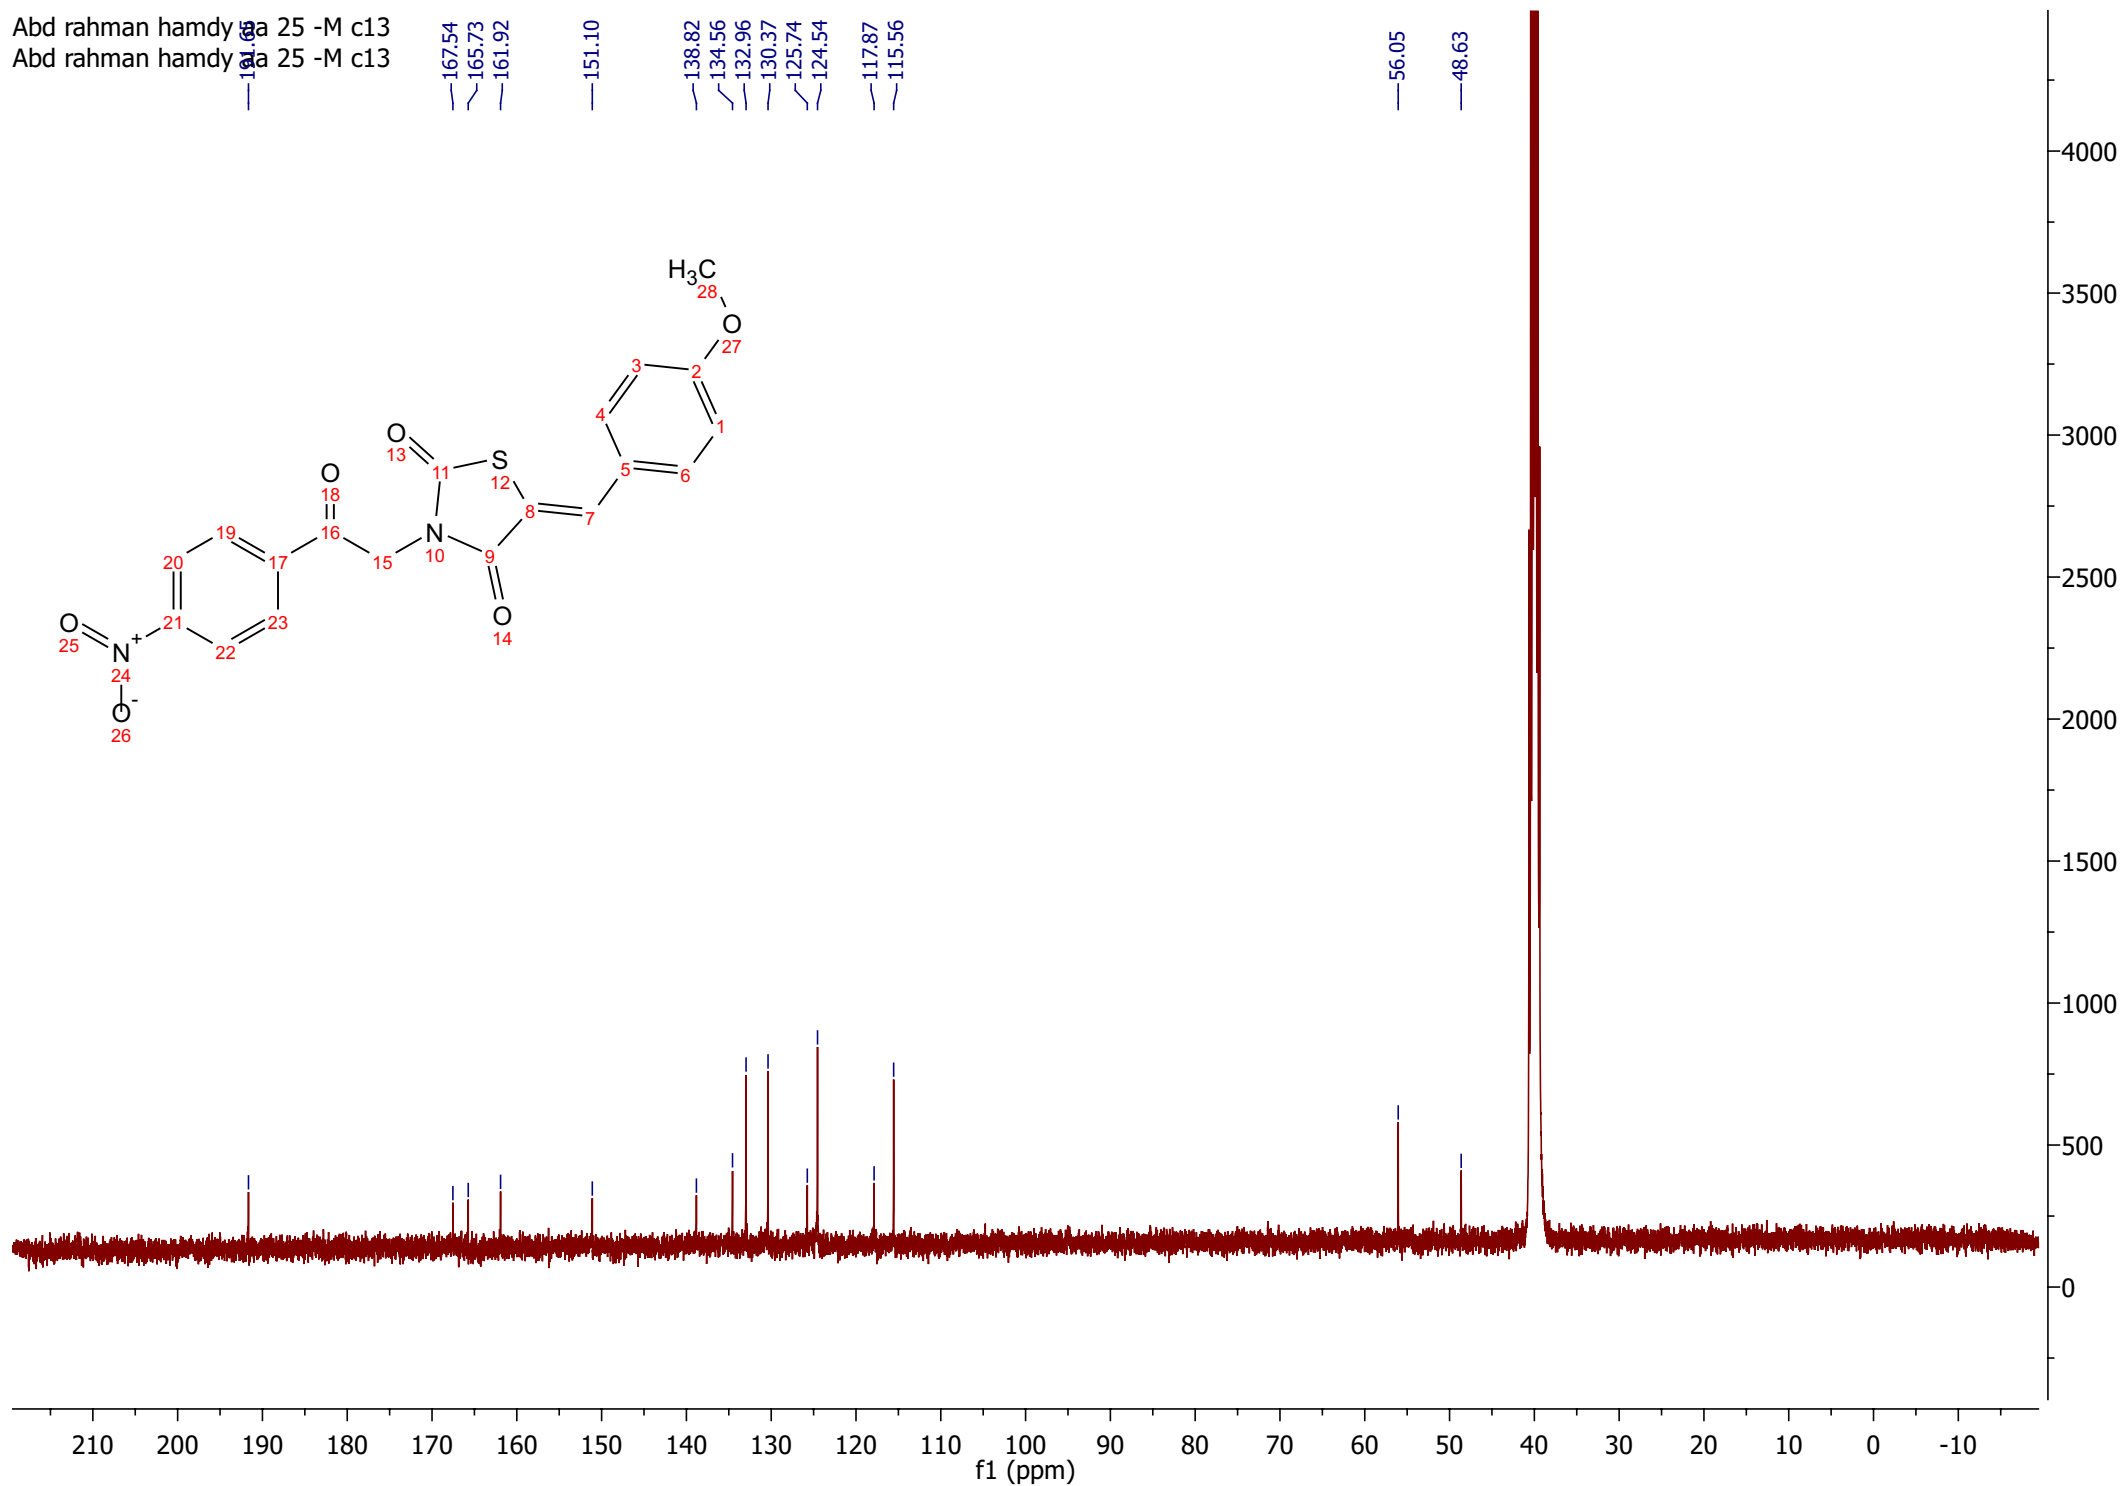

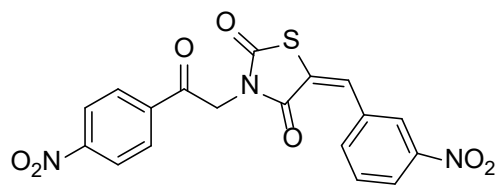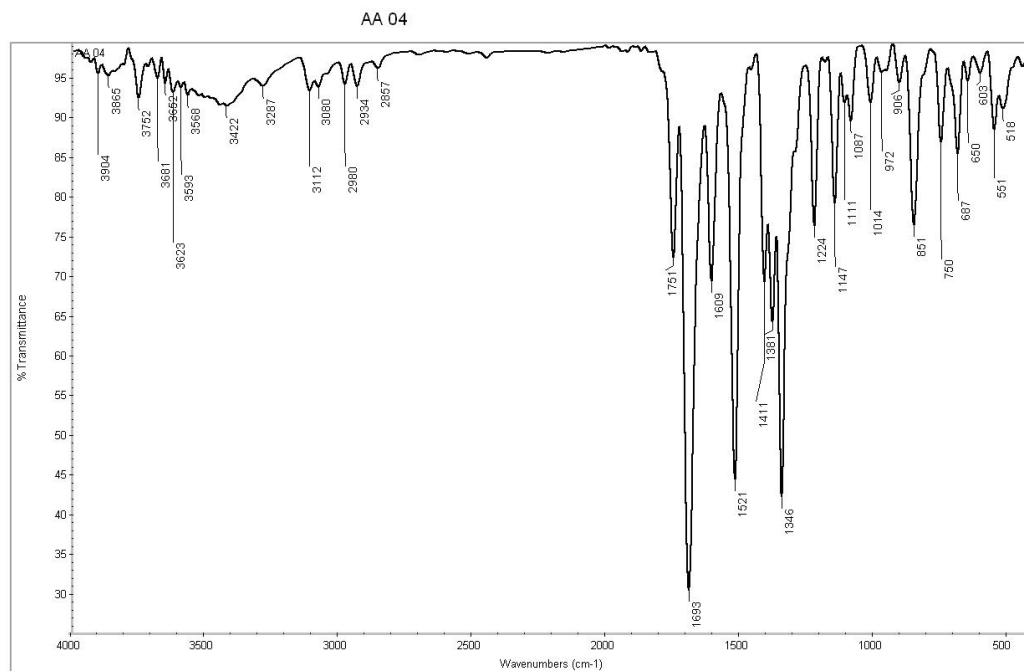

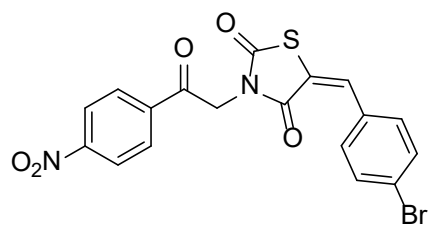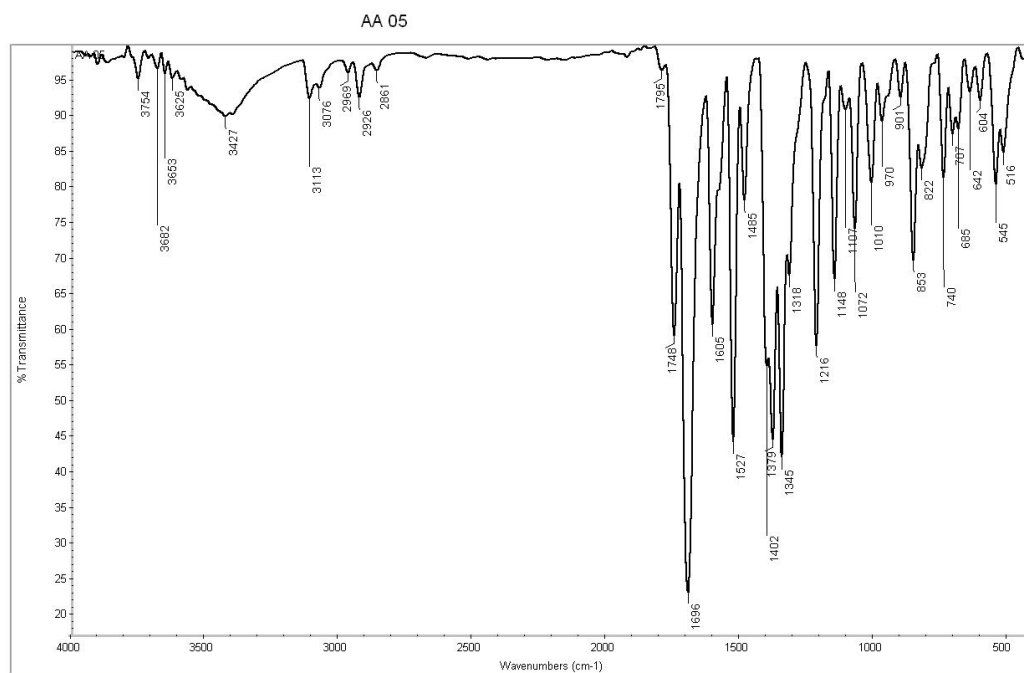

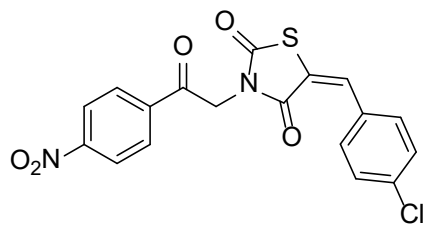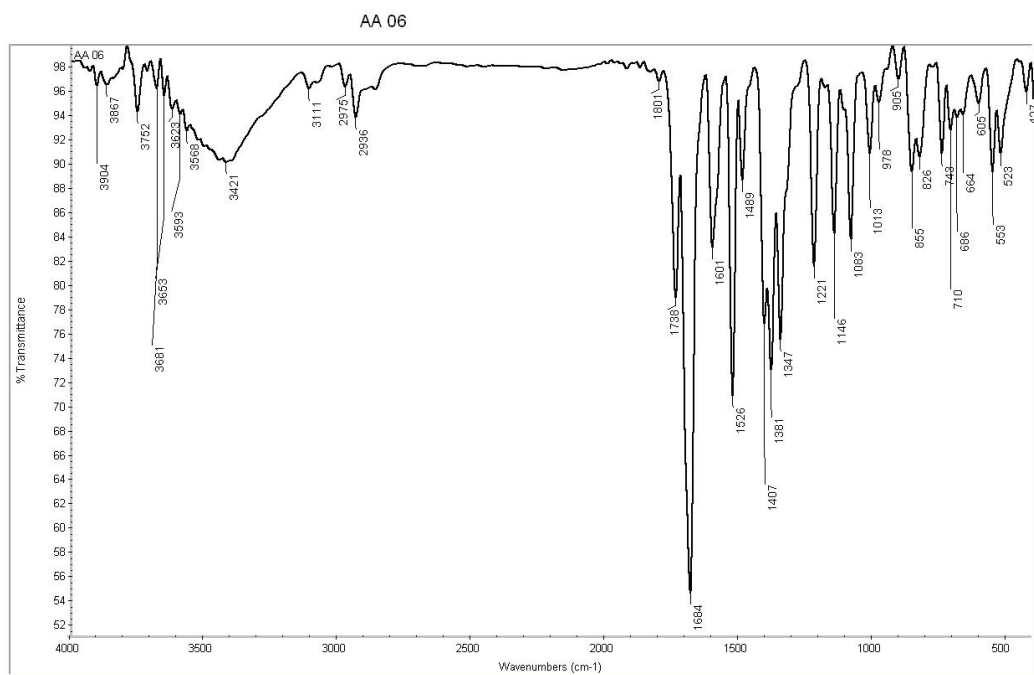

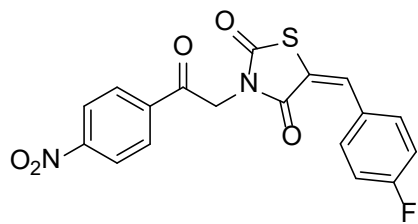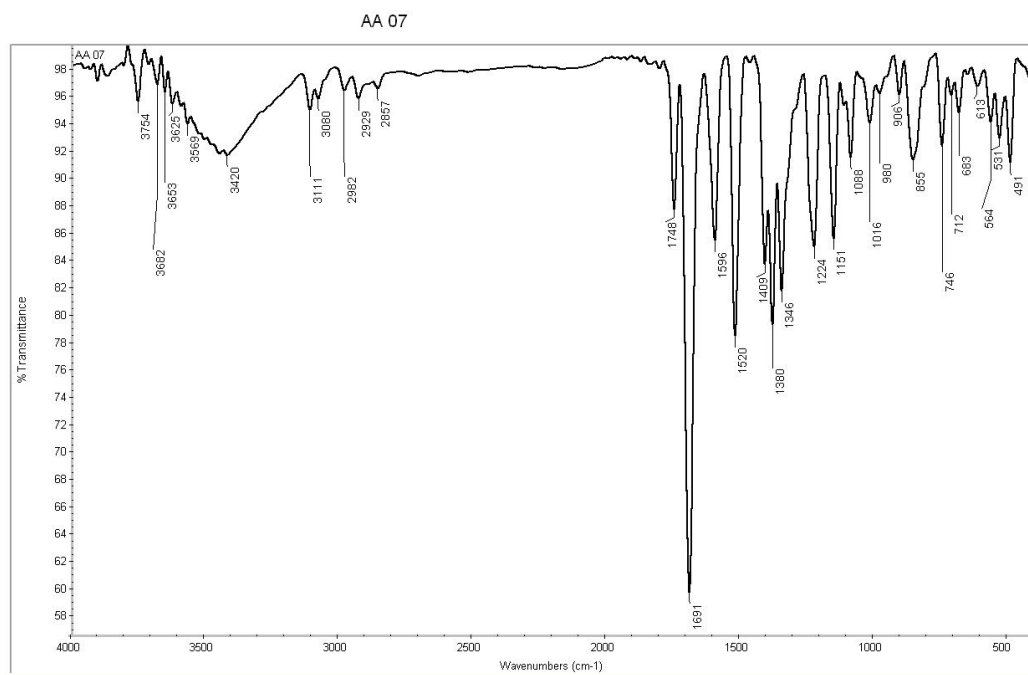

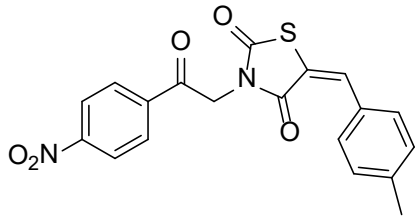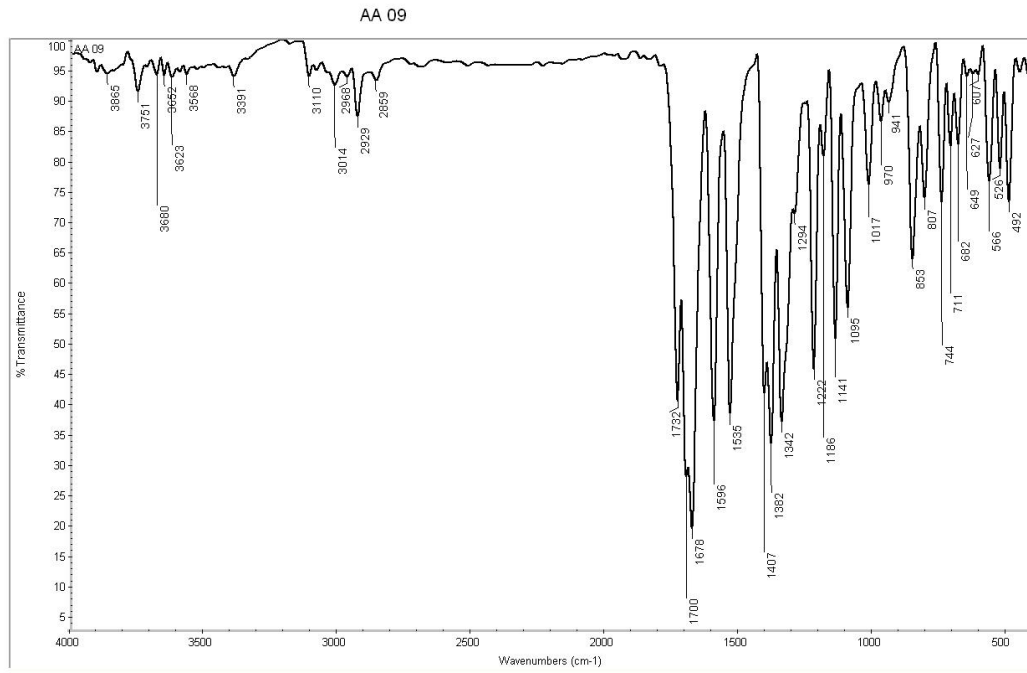

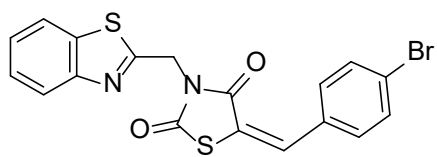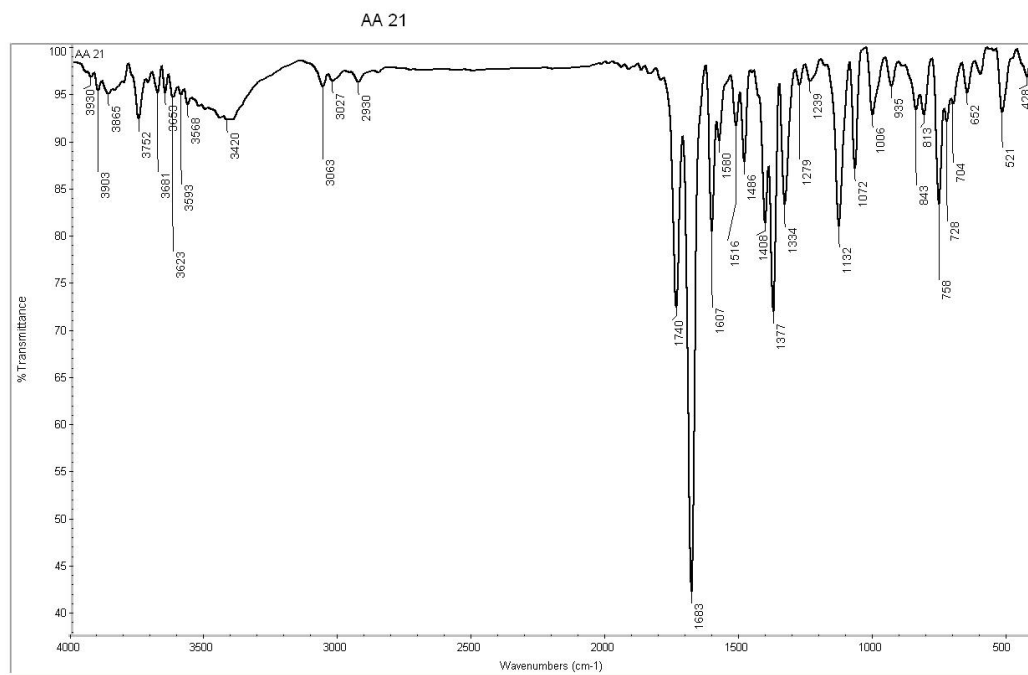



| Best-fit values |         |
|-----------------|---------|
| LogIC50         | 2.357   |
| HillSlope       | -0.4199 |
| IC50            | 227.4   |

AA03  $IC_{50} = 227.4$   
 $R^2 = 0.8926$

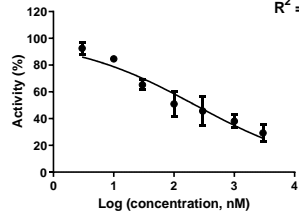

| Best-fit values |         |
|-----------------|---------|
| LogIC50         | 2.709   |
| HillSlope       | -0.4960 |
| IC50            | 511.7   |

AA04  $IC_{50} = 511.7$   
 $R^2 = 0.9715$

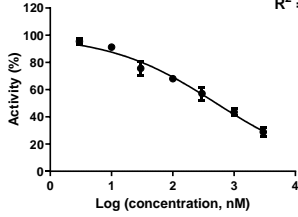

| Best-fit values |         |
|-----------------|---------|
| LogIC50         | 2.693   |
| HillSlope       | -0.4353 |
| IC50            | 493.7   |

AA05  $IC_{50} = 493.7$   
 $R^2 = 0.9403$

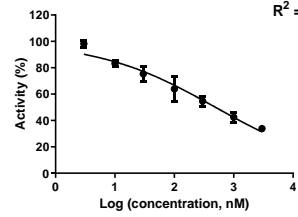

| Best-fit values |         |
|-----------------|---------|
| LogIC50         | 2.670   |
| HillSlope       | -0.6081 |
| IC50            | 468.0   |

AA06  $IC_{50} = 468.0$   
 $R^2 = 0.9794$

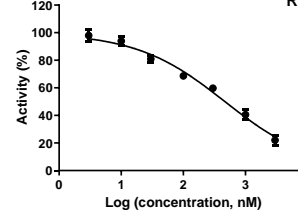

| Best-fit values |         |
|-----------------|---------|
| LogIC50         | 2.760   |
| HillSlope       | -0.5977 |
| IC50            | 575.1   |

AA07  $IC_{50} = 575.1$   
 $R^2 = 0.9605$

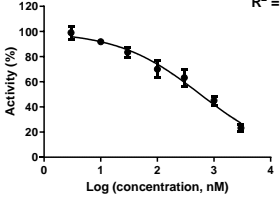

| Best-fit values |         |
|-----------------|---------|
| LogIC50         | 2.613   |
| HillSlope       | -0.5861 |
| IC50            | 410.2   |

AA08  $IC_{50} = 410.2$   
 $R^2 = 0.9710$

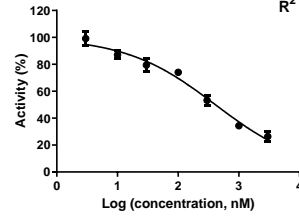

| Best-fit values |         |
|-----------------|---------|
| LogIC50         | 2.747   |
| HillSlope       | -0.6936 |
| IC50            | 558.0   |

AA09  $IC_{50} = 558.0$   
 $R^2 = 0.9713$

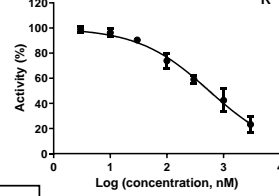

| Best-fit values |         |
|-----------------|---------|
| LogIC50         | 2.861   |
| HillSlope       | -0.4612 |
| IC50            | 726.7   |

AA10  $IC_{50} = 726.7$   
 $R^2 = 0.8431$

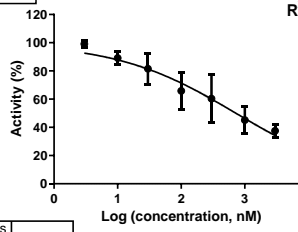

| Best-fit values |         |
|-----------------|---------|
| LogIC50         | 2.472   |
| HillSlope       | -0.5624 |
| IC50            | 296.4   |

AA18  $IC_{50} = 296.4$   
 $R^2 = 0.9677$

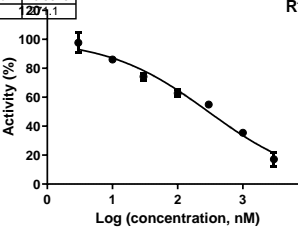

| Best-fit values |         |
|-----------------|---------|
| LogIC50         | 2.212   |
| HillSlope       | -0.4885 |
| IC50            | 163.0   |

AA19  $IC_{50} = 163.0$   
 $R^2 = 0.9170$

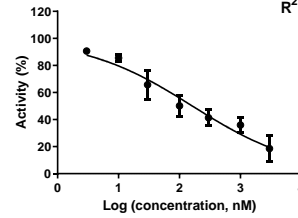

| Best-fit values |         |
|-----------------|---------|
| LogIC50         | 2.525   |
| HillSlope       | -0.4516 |
| IC50            | 335.1   |

AA20  $IC_{50} = 335.1$   
 $R^2 = 0.9057$

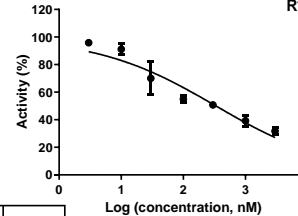

| Best-fit values |         |
|-----------------|---------|
| LogIC50         | 2.433   |
| HillSlope       | -0.5646 |
| IC50            | 271.1   |

AA17  $IC_{50} = 271.1$   
 $R^2 = 0.9343$

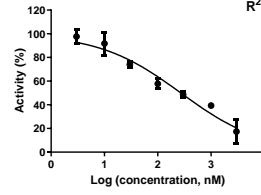

| Best-fit values |         |
|-----------------|---------|
| LogIC50         | 2.656   |
| HillSlope       | -0.8046 |
| IC50            | 452.6   |

AA22  $IC_{50} = 452.6$   
 $R^2 = 0.9762$

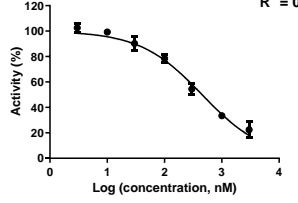

| Best-fit values |         |
|-----------------|---------|
| LogIC50         | 3.297   |
| HillSlope       | -0.5953 |
| IC50            | 1980    |

AA23  $IC_{50} = 1980$   
 $R^2 = 0.9297$

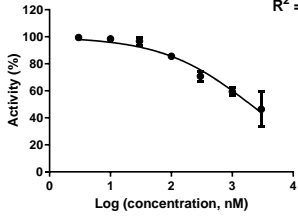

| Best-fit values |         |
|-----------------|---------|
| LogIC50         | 2.975   |
| HillSlope       | -0.5687 |
| IC50            | 944.9   |

AA24  $IC_{50} = 944.9$   
 $R^2 = 0.9656$

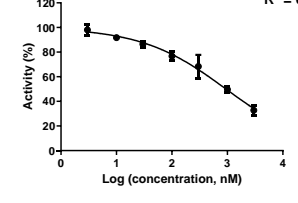

| Best-fit values |         |
|-----------------|---------|
| LogIC50         | 2.334   |
| HillSlope       | -0.4244 |
| IC50            | 215.6   |

AA21  $IC_{50} = 215.6$   
 $R^2 = 0.9490$

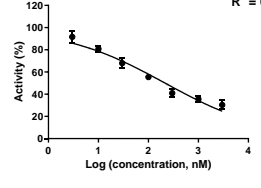

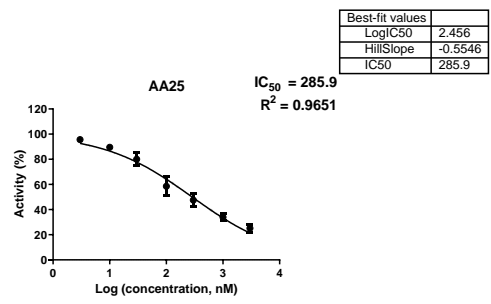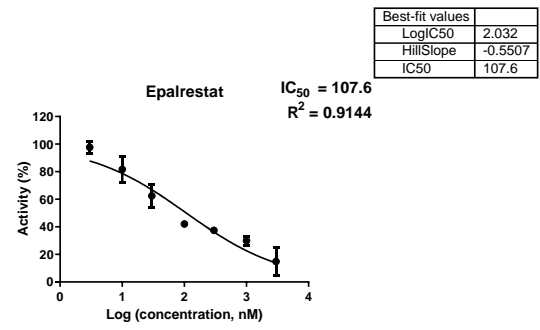

Supplement: IENZ_A_2231170_SM9114.pdf [file IENZ_A_2231170_SM9114.pdf]
